# Supplementary material for: Inflammatory immune profiles associated with disease severity in pulmonary tuberculosis patients with moderate to severe clinical TB or anemia
Source: Front Immunol. 2023 Dec 12;14:1296501. doi: 10.3389/fimmu.2023.1296501 (PMC10756900; doi:10.3389/fimmu.2023.1296501)
Supplement: Supplementary file 2 [file DataSheet_2.xlsx]

## Sheet: Magpix Plasma 37-plex
ID	Time point	Blood Hb status	Lung involvement	Clinical TB score	April/TNFSF13	BAFF/TNFSF13B	sCD30/TNFSF8	sCD163	Chitinase 3-like 1	gp130/sIL-6R β	IFN alpha2	IFNbeta	IFNgamma	IL-2	sIL-6Ra	IL-8	IL-10	IL-11	IL-12(p40)	IL-12(p70)	IL-19	IL-20	IL-22	IL-26	IL-28A/IFN-delta2	IL-29/IFN-delta1	IL-32	IL-35	LIGHT/TNFSF14	MMP-1	MMP-2	MMP-3	Osteocalcin	Osteopontin (OPN)	Pentraxin-3	sTNF-R1	sTNF-R2	TSLP	TWEAK/TNFSF12
B019 W0	Week 0	Non-anemic	Extensive	Mild	156694	15878.9	1380.46	4523.14	33892.8	121612	61.54	151.49	35.2	10.1	19653.1	54.91	13.98	3.04	81.49	1.64	18.64	107.65	43.19	46.2	46.86	41.68	33.53	312.74	98.21	4421.62	64971.4	19058.7	5780.78	190063	1583.2	3115.9	21172.3	61.56	523.31
B053 W0	Week 0	Non-anemic	Limited	Mild	74865.1	11529.1	608.12	2383.95	8832.68	89118.8	31.49	95.35	18.03	2.64	11537.9	16.12	9.63	0.12	34.42	0.07	15.17	66.76	27.35	16.44	30.14	14.86	48.59	169.96	17.1	2314.19	45054.7	4048.61	7573.1	98040.9	1537.77	2433.68	9480.03	32.88	316.03
B081 W0	Week 0	Anemic	Limited	Mild	102747	23340.6	929.92	6232.28	21485.4	111933	57.76	131.77	25.55	5.41	25084.3	37.51	10.19	1.51	18.53	0.6	27.68	78.9	38.09	44.04	41.36	38.21	66.74	319.58	141.57	4677.7	28449.3	8307.46	8207.39	113879	792.44	3313.36	9599.51	42.57	362.89
B086 W0	Week 0	Anemic	Extensive	Mild	249579	107946	4809.07	3418.25	89721.6	105465	77.7	198.6	59.56	12	17083.3	80.3	10.72	9.8	85.45	0.7	14.18	167.06	50.05	24.13	35.22	54.4	122.94	347.4	395.39	8321.38	66042	13266.5	4496.63	169447	3242.1	5649.22	32016.2	79.87	418.29
B122 W0	Week 0	Non-anemic	Limited	Mild	103854	10893.6	827.28	3641.09	29003.7	116012	46.72	133.26	26.34	7.28	16901.8	17.19	9.56	1.99	49.85	0.01	18.91	53.96	30.47	36.06	35.22	25.76	5.78	183.62	114.25	1278.15	58458.1	2892.27	29666.6	224664	979.5	4558.33	12873.8	38.97	504.84
B123 W0	Week 0	Non-anemic	Limited	Mild	59074.1	13561.8	1159.54	4178.91	20627.6	100525	50.7	145.85	26.34	3.31	11022.4	24.9	9.56	1.99	91.81	0.01	10.51	60.11	20.4	19.96	35.22	32.56	2.18	214.13	120.2	2498.31	52464.3	7360.16	8327.08	110710	1365.32	3054.86	11045.6	40.9	569.51
B138 W0	Week 0	Anemic	Extensive	Mild	130502	35618.4	1108.58	4822.99	48793.1	108766	70.04	138.8	53.62	8.76	18564.8	57.82	8.52	4.76	45.39	0.83	20.91	125.64	19.36	56.37	42.5	45.43	53.83	208.17	115.94	4852.11	32037.3	5131.82	8767.96	212267	2215.89	6345.99	22240.5	66.27	1011.6
B142 W0	Week 0	Anemic	Extensive	Mild	158148	11912.6	470.7	3401.46	140957	124277	41.84	120.58	34.6	3.51	16255.2	18.72	4.24	0.66	53.26	0.26	6.39	64.77	13.44	44.21	42.5	11.61	98.04	181.85	88.42	3125.89	44380.1	7896.25	2432.17	157844	347.86	3359.27	8654.52	58.62	707.35
B148 W0	Week 0	Non-anemic	Limited	Mild	145440	9258.16	453.61	3428.15	29789.2	144565	47.27	115.46	41.06	2.13	27879.3	32.66	0.1	1.31	34.71	0.07	4.84	64.77	8.45	25.23	0.52	32.92	0.52	234.3	43.8	1395.9	71871.6	16176.5	3447.03	105655	1600.02	5239.6	17990.9	47.86	576.15
B157 W0	Week 0	Anemic	Limited	Mild	138580	11232.7	649.24	3421.57	42540.2	91495.7	35.29	100.82	30.77	3.1	17501.4	41.18	4.82	2.44	56.67	0.43	18.06	53.34	16.57	14.19	43.64	23.99	48.54	107.13	36.08	3061.75	52950.1	12270.4	7843.02	84266.2	141.33	3892.76	12664.9	59.96	483.29
B185 W0	Week 0	Non-anemic	Extensive	Mild	49639.7	17415.3	266.09	5779.92	45018.3	91086.8	49.67	116.04	30.77	5.63	23272	28.36	11.04	2.44	56.67	0.32	10.77	69.39	35.45	16.34	52.96	23.99	109.12	144.51	153.73	2329.08	34878.8	9393.38	4994.94	120556	1481.57	3751.12	12871.6	41.07	642.96
K001 W0	Week 0	Non-anemic	NR	Mild	191104	71666.6	1156.18	3624.74	84213.6	111863	42.53	197.43	47.86	3.73	5507.69	66.26	8.13	3.86	61.49	0.01	10.77	87.93	44.64	24.93	55.59	29.22	0.52	206.18	110.45	5037.4	64028.9	12960.3	6339.17	199654	715.81	6580.25	27255.1	64.61	683.03
K038 W0	Week 0	Non-anemic	Extensive	Mild	116113	10754	623.89	2767.1	45746.7	103516	43.9	91.49	34.27	3.47	16185.4	53.98	8.54	1.77	63.75	1.1	19.13	97.57	18.29	53.18	43.35	24.46	82.37	203.02	203.46	14301.9	26525.5	5346.45	5864	129025	1431.48	5017.24	18565.2	41.76	594.15
T048 W0	Week 0	Non-anemic	NR	Mild	158957	14330.5	1176.19	2077.4	38347.2	97736.3	60.14	165.92	30.93	5.99	16316.9	66.59	8.03	2.97	115.58	2.15	12.77	83.01	32.63	16.72	55.39	35.59	19.63	241.14	153.5	2046.14	47766.9	2747.57	7236.25	99438.3	1184.97	4731.25	17615	37.98	731.02
T053 W0	Week 0	Anemic	Extensive	Mild	257835	55596.3	1871.48	3196.92	22445.3	91542.3	75.82	123.32	78.28	6.31	17625.3	147.67	12.94	3.7	69.73	1.69	82.44	151.86	42.49	108.6	52.73	49.03	32.96	266.39	102.41	4378.24	40370.2	15360.6	11180.1	291211	3306.87	5904.62	23951	70.13	983.09
T054 W0	Week 0	Non-anemic	Extensive	Mild	103800	14863.6	961.47	6456.24	28998.6	140501	59.51	164.89	45.23	5.5	11648.6	42.69	9.69	4.2	54.77	1.26	21.69	89.18	18.13	34.38	52.08	28.71	40.45	289.09	123.89	2633.47	39642.1	6825.53	6308.5	114933	1358.78	5200.14	16210.3	58.17	613.05
T064 W0	Week 0	Non-anemic	Extensive	Mild	64500.3	16783.5	792.69	4679.15	28762.1	47870.8	33.81	57.26	34.31	4.57	14426.9	24.76	4.05	3.03	88.42	0.35	25.15	71.66	14.46	26.53	46.05	18.74	44.93	241.34	76.9	2761.18	27660.6	3192.63	3357.29	79835.6	245.26	3553.41	13179.8	40.8	275.76
T008 W0	Week 0	Anemic	Limited	Mod-sev	232777	102708	2866.29	8298.69	142937	209937	100.09	274.13	95.28	13.91	13283.1	87.63	13.86	9.43	164.99	1.97	29.97	216.62	77.21	49.4	84.56	88.76	124.91	470.87	386.65	3891.33	37317.2	7867.42	866.93	214879	3800.32	13377.1	70111.3	121.8	651.52
B038 W0	Week 0	Non-anemic	Limited	Mild	63915.3	6559.63	457.59	2360.49	17809.9	109190	37.91	87.88	18.03	3.59	14879.7	16.12	2.78	0.12	34.42	0.01	13.29	54.05	27.35	11.31	32.98	31.01	0.52	154.7	31.19	1288.66	73343.2	3129.85	9715.82	43983	933.77	1757.14	4383.47	26.59	290.29
B046 W0	Week 0	Non-anemic	Limited	Mild	30511.4	5336.68	768.03	413.22	16172.5	65395.7	33.66	62.42	15.46	3.59	2621.04	24.64	6.71	0.12	55.41	0.01	16.95	129.57	24.51	12.62	31.56	23.34	0.52	169.96	19.88	3348.33	72139.5	10167.9	4057.32	68392.8	1644.47	2054.54	7574.63	30.2	463.8
B066 W0	Week 0	Non-anemic	Limited	Mod-sev	104800	17696.6	1167.16	3154.7	24234.5	27565.6	50.04	75.92	30.42	7.16	10756.4	37.51	9.91	0.61	39.68	0.6	18.64	72.89	24.51	37.46	44.11	38.21	54.63	169.96	108.02	4992.32	32318.9	10564.8	7201.53	123505	2371.71	5032.14	19469.8	44.32	285.17
B098 W0	Week 0	Non-anemic	Extensive	Mild	84804.9	17196.6	457.92	6809.43	21488	109059	42.7	73.77	26.34	4.33	18885.6	24.9	5.89	2.38	39.89	0.31	11.48	66.2	22.94	26.17	37.88	32.56	48.57	175.92	51.06	3780.02	32515.3	4895	12034	98888.8	1708.57	2931.06	6613.16	33.1	360.13
B101 W0	Week 0	Anemic	Extensive	Mod-sev	160915	25202.8	1735.56	3654.74	63616.3	123386	54.64	152.65	38.45	2.26	31362.4	34.25	8.38	4.56	85.45	0.01	12.41	72.24	22.94	23.1	43.17	32.56	0.52	281.47	202.2	1786.33	63774.5	17365.7	10594.6	156687	1652.39	6009.91	24519.2	53.25	408.36
B108 W0	Week 0	Anemic	Extensive	Mod-sev	97794.9	18905.8	848.64	2409.41	34270.4	113375	34.5	125.53	26.34	2.79	16210.4	21.27	11	1.17	88.64	0.7	15.83	78.22	27.98	22.06	27.13	14.57	122.94	72.23	246.47	1867.99	51497.9	6277.61	5647.7	119258	2929.04	2286.82	9064.2	42.82	344.46
B109 W0	Week 0	Anemic	NR	Mod-sev	100121	15125.9	563.56	5602.33	19287.9	90679.2	41.84	72.82	31.31	1.79	22038.1	18.72	3.73	1.31	40.08	0.01	9.2	61.95	9.73	9.26	30.54	20.26	45.82	195.04	82.64	2127.1	60285.8	11664.6	5787.64	149766	1977.75	3557.98	13194.5	60.54	843.9
B128 W0	Week 0	Non-anemic	Extensive	Mod-sev	180678	52541.2	1360.27	2264.46	182523	138131	59.66	161.94	53.62	9.41	26706.7	68.23	11.17	4.3	66.17	0.01	13.02	114.7	50.84	31.96	42.5	37.1	132.29	369.03	558.33	6999.93	39999.1	8604.65	7669.34	190327	3534.39	11001.4	38680.4	66.27	1178.02
B167 W0	Week 0	Non-anemic	Extensive	Mild	68633.1	13429.6	512.24	4120.5	91326	36877.8	41.84	66.57	34.6	2.13	11305.3	26.24	2.09	0.99	55.86	0.07	7.83	47.72	2.98	4.57	35.35	22.39	0.52	141.93	40.22	2094.83	66120.7	7930.8	3456.78	95592.8	611.45	3266.39	16689.8	48.85	543.15
B178 W0	Week 0	Non-anemic	Extensive	Mild	120950	17368.2	1230.79	2979.81	35089.6	118291	49.67	123.74	33.68	2.78	34066	41.18	9.27	3.7	80.69	0.01	16.38	74.7	7.88	16.34	58.2	34.31	0.52	242.9	20.6	8329.91	67391.7	15400.7	8651.2	225603	1604.86	5204.27	15143.6	61.82	533.07
B182 W0	Week 0	Anemic	Limited	Mild	131530	42834.2	1583.27	2543.67	56730.3	121961	44.32	139.31	42.25	3.1	21519.8	41.18	15.75	0.12	59.08	0.11	18.06	74.7	27.3	27.08	35.47	31.78	144.54	144.51	189.93	4579.44	65626.9	15266.7	5667.76	316860	1499.23	5442.46	21500.6	54.35	572.98
B193 W0	Week 0	Non-anemic	NR	Mod-sev	54830.1	12240.4	607.61	1912.94	33710.8	37844.3	31.63	85.86	43.66	1.83	12130.8	28.36	5.55	1.77	37.32	0.74	18.06	61.39	14.13	21.71	28.48	23.99	0.52	193.9	50.38	3191.96	62168.2	2010	7811.85	102019	334.21	3199.75	16959	31.37	632.95
B196 W0	Week 0	Non-anemic	Limited	Mild	121417	20880.3	1355.27	4106.27	95852.7	95404.1	41.81	86.17	47.29	4.72	27893.7	30.88	1.24	2.53	57.7	0.23	12.77	83.01	16.07	31.09	39.28	30.08	0.52	203.02	99.88	3599.35	44733.5	9605.06	3151.57	122409	1190.88	3279.79	16774.8	46.49	716.82
B201 W0	Week 0	Anemic	NR	Mod-sev	194640	63614.6	2499.94	3022.09	91911.9	105586	60.14	186.14	35.93	4.09	16110	72.41	10.53	3.84	69.73	0.23	14.45	94.67	29.34	28.27	47.39	43.7	144.3	247.47	135.14	3907.42	42798.2	15349.3	10048.6	397227	958.04	6385.79	29405.6	77.7	697.91
K047 W0	Week 0	Non-anemic	Extensive	Mild	181962	44988.5	750.35	4874.26	21288	125289	52.11	132.35	30.93	3.15	15093.2	437.56	4.57	1.77	57.7	0.49	10.09	85.94	22.72	28.27	44.7	38.32	46.21	285.24	176	3839.35	30631.5	12199.5	4207.54	166377	2434.23	4710.69	17097.3	56.88	745.23
T025 W0	Week 0	Anemic	Extensive	Mild	195413	30057.4	2151.78	5162.71	37714.6	136104	59.51	131.74	52.28	7.32	4045.59	38.54	10.49	3.81	108	1.26	19.86	83.34	28.51	29.18	56.57	33.69	134.21	304.74	183.38	6831.57	27475.3	9510.49	15471.5	92558.7	455.1	7556.26	34841.2	66.02	306.42
T075 W0	Week 0	Non-anemic	Extensive	Mild	66856.4	5110.2	611.28	3667.2	30909.7	144435	42.56	113.91	41.64	6.42	18556.9	19.47	10.76	3.42	68.42	0.96	13.82	71.66	31.82	29.18	55.08	23.72	84.52	241.34	101.41	2013.42	36281.7	2169.05	7673.3	110230	1434.21	4005.55	9429.92	38.42	589.99
T095 W0	Week 0	Non-anemic	Limited	Mild	125213	46343	1383.32	3896.54	39869.5	109235	67.79	169.22	88.9	8.67	18294.8	42.69	13.35	4.96	133.6	0.67	15.95	129.88	50.72	34.38	49.07	33.69	78.52	257.39	360.63	3135.59	24129.9	6172.99	2501.55	105882	2471.32	5686.99	30303.5	87.91	413.61
B057 W0	Week 0	Anemic	Extensive	Mod-sev	178373	93868.8	2956.24	6141.02	27455.9	104861	81.65	224.02	53.69	11.33	19165	88.8	12.38	6.33	102.25	3.07	29.05	161.32	45.7	63.05	60.38	41.68	91.03	366.85	222.39	11595.3	41474.2	5889.54	4593.8	149781	2257.13	5112.38	47588.1	89.49	204.61
B084 W0	Week 0	Anemic	Limited	Mod-sev	88333.5	52602.2	1304.63	2958.63	24859.4	108238	68.97	123.98	44.55	9.69	7088.38	61.35	10.19	4.45	84.09	1.33	21.84	134.94	62.58	44.04	49.58	51.72	78.87	285.2	224.74	4356.94	20644.1	8346.63	6396.38	125507	1667.66	6060.61	31815.1	58.14	259.71
B085 W0	Week 0	Anemic	Limited	Mod-sev	92460.6	19233.1	728.8	10931.2	51641.5	127422	57.76	115.29	20.57	7.16	7019.09	16.12	8.49	2.15	76.29	0.01	23.36	102.04	35.48	26.09	55	31.01	39.54	184.97	212.19	4095.35	26478.8	11663.4	6508.12	91914.5	1715.69	4035.68	15478.9	50.39	407.72
B087 W0	Week 0	Non-anemic	Extensive	Mod-sev	113469	45724.8	1261.21	6651.31	40740.2	119200	58.55	150.7	49.99	6.31	22295.1	37.02	12.95	2.76	82.26	0.31	10.51	78.22	27.98	24.13	37.88	32.56	119.67	244.26	292.43	2913.02	28798.5	7536.85	2627.05	170210	2957.54	10078.6	33122.6	56.99	357.53
B095 W0	Week 0	Anemic	Extensive	Mod-sev	79844.2	23979.7	1976.54	3296.59	38686.9	130233	46.72	154.59	49.99	6.31	12030	51.59	11	4.56	98.15	1.39	17.41	95.93	39.11	22.06	35.22	45.32	75.23	288.86	551.49	4301.53	77146.7	16561	1652.99	191739	2434.21	10136.3	7662.37	53.25	378.13
B106 W0	Week 0	Anemic	Extensive	Mod-sev	131746	38666.3	1277.72	12148.9	34697.1	118955	50.7	131.33	51.6	6.31	9489.21	47.04	10.72	6.42	46.55	0.31	15.02	84.16	54.86	34.12	37.88	39.05	53.59	296.23	217.63	6941.87	34254.8	17467.2	4563.43	146113	4874.58	10672.6	35326.6	81.68	315.07
B107 W0	Week 0	Anemic	Limited	Mod-sev	143393	120889	1629.16	3311.35	182523	74002.6	52.62	186.58	71.79	5.51	16083.1	81.48	13.7	4.14	50.65	0.07	14.81	136.53	36.05	20.71	46.05	41.27	132.29	195.04	150.85	1833.68	30279.4	6368.9	1811.06	199828	2339.11	10095	29090	71.94	641.9
B111 W0	Week 0	Anemic	Extensive	Mod-sev	96338.7	13760.2	1478.35	2926.13	17649.8	95680.9	52.62	70.46	34.6	2.13	8958.6	79.66	11.59	1.95	18.11	1.2	23	64.77	25.06	38.66	30.54	37.1	85.5	260.25	70.38	3988.87	76144.3	9257.59	6518.41	284172	1423.47	5821.66	22658.3	52.79	1203.53
B112 W0	Week 0	Anemic	Extensive	Mod-sev	68917.2	18123.1	1118.02	4965.18	82001.2	96884.4	63.14	82.35	53.62	6.17	17723	48.67	3.99	3.83	48.02	0.01	10.52	87.13	15.84	28.6	49.6	45.43	0.52	240.8	75.43	3216.74	55114.6	3725.88	12757.8	146601	1738.52	5701.11	24654.3	51.81	876.26
B143 W0	Week 0	Anemic	Limited	Mod-sev	100584	36213.8	840.86	2582.28	150920	124458	56.74	161.06	36.56	3.1	17385.3	56.99	7.9	2.44	63.89	0.01	12.76	85.29	28.47	12.05	46.32	39.3	21.88	206.18	91.24	960.3	83452.6	7997.74	3318.11	73746.1	882.41	6611.12	29187.9	54.35	513.14
B172 W0	Week 0	Anemic	Extensive	Mod-sev	356287	192152	5714.83	8947.06	108904	144221	110.2	263.18	77.59	10.06	18020	101.62	11.26	5.5	118.88	0.63	19.67	179.03	44.64	43.16	93.93	81.8	141.31	291.6	456.12	6260.17	83117.9	14075.2	4480.16	2300200	2641.34	17068.9	91912.4	111.13	592.95
B189 W0	Week 0	Anemic	Limited	Mod-sev	131530	26711.5	2041.74	6944.54	142420	143577	62.01	187.24	42.25	4.68	17203.9	35.11	4.08	2.76	51.84	0.01	21.22	85.29	31.98	22.79	50.31	34.31	9.53	206.18	153.73	4425.29	71517.3	7093.45	6538.48	171531	524.82	8993.35	57364.4	58.09	713.12
B190 W0	Week 0	Anemic	Extensive	Mod-sev	140624	17918.5	649.83	2971.77	20934.7	112117	31.11	136.9	34.27	4.09	14792.1	53.98	7.52	1.15	69.73	0.23	27.48	47.29	16.07	16.72	41.99	6.33	21.3	151.59	0.57	3975.28	61265.7	14354.3	4399.79	71645.2	1875.59	5441.66	26349.2	27.57	731.02
K049 W0	Week 0	Anemic	Extensive	Mod-sev	116740	20762.8	693.22	4896.97	23841.5	108544	39.71	92.57	27.55	2.53	15510.9	98.44	8.29	0.14	5.63	0.23	11.01	71.25	17.18	39.48	44.7	21.59	0.52	215.77	84.64	2273.38	61620.2	2954.36	2580.48	140532	2414.13	4062.32	14283.2	30.41	797.38
T066 W0	Week 0	Anemic	Limited	Mod-sev	152802	35948.1	680.7	2738.29	22920.2	99623.1	39.71	90.43	34.27	2.21	25901.9	47.02	5.94	1.31	51.55	0.49	14.45	65.32	13.84	13.76	35.17	30.08	31.3	190.24	85.49	2932.25	6077.8	3106.93	7519.14	155253	1427.33	3391.05	19264.4	37.98	660.12
T105 W0	Week 0	Anemic	Extensive	Mod-sev	157445	46901.7	3024.96	14319.5	42859	159667	84.07	217.62	75.92	14.34	15143.1	50.54	13.35	6.1	177.38	0.96	17.96	147.26	49.2	49.4	84.56	51.18	190.15	411.55	419.74	15209.8	31770.1	13674.4	7115.49	188329	397.1	13441.1	42684.5	100.75	505.56
T115 W0	Week 0	Anemic	Limited	Mod-sev	355915	80814.8	1880.83	4109.91	56342.7	82418.4	84.07	129.63	72.62	10	8198.24	90.67	6.39	4.96	139.93	2.52	33	141.47	80.07	41.98	64.01	38.69	0.52	320.29	114.79	10016.5	46753.5	4500.8	4570.78	133698	1043.72	5361.74	37098.7	71.57	582.31
T117 W0	Week 0	Non-anemic	Limited	Mod-sev	119082	25872.7	1635.1	2455.24	33322	96217.8	46.86	145.55	52.28	5.5	9828.05	34.2	5.24	4.58	75.14	0.67	13.82	65.8	25.14	23.85	55.08	23.72	26.39	183.77	104.53	3813.66	36557.8	14373.7	2195.66	106187	1515.63	3960.94	29554.2	54.76	291.09
B001 W0	Week 0	Non-anemic	Extensive	Mild	163510	21089.2	1053.42	1878.09	48101	137012	68.97	114.33	44.55	10.51	32631.4	47.96	9.63	3.04	76.29	1.33	21.84	96.37	31.48	26.09	60.38	38.21	167.43	333.17	57.26	3348.33	54577.8	12739.3	17072.1	66485.3	1530.24	3995.8	12576.5	65.83	415.69
B088 W0	Week 0	Non-anemic	Extensive	Mild	113505	22495.5	633.44	8536.35	20751.1	134198	70.8	190.89	32.82	8.85	29037.1	47.96	12.38	3.04	89.28	0.6	20.27	102.04	30.12	39.67	60.38	58.18	97.12	299.02	38.35	5178.43	113723	7833.91	8598.91	109538	975.39	2647.56	8925.57	64.97	458.43
B116 W0	Week 0	Anemic	Extensive	Mild	58674.7	9414.24	752.73	3917.99	41048.3	73844.1	46.08	108.59	30.42	8.01	13659.3	16.12	8.49	1.17	55.41	0.07	13.29	78.9	38.09	32.98	41.36	27.25	75.84	184.97	95.95	3625.22	33731.3	9792.61	4041.8	107388	1037.52	2866.39	12482.3	51.26	244.55
B164 W0	Week 0	Non-anemic	Limited	Mild	81832.7	15374.3	971.6	8141.88	33533.8	118201	54.64	166.28	56.4	5.33	18974.3	28.23	10.72	3.13	66.18	0.7	21.74	72.24	35.42	41.8	43.17	10.32	48.57	354.66	120.2	6152.26	82739.8	5647.34	6643.38	149402	1439.64	3133.62	17022.1	48.54	445.23
B175 W0	Week 0	Non-anemic	Extensive	Mild	53092.7	13944.7	768.76	4005.38	41426.4	109272	58.55	139.06	43.45	4.83	8811.55	31.33	11.84	4.21	75.86	0.01	17.41	87.12	35.42	29.19	43.17	32.56	12.82	296.23	321.08	4232.76	83299.1	4393.26	9015.14	191562	371.43	2610.4	19939.8	40.9	493.08
B181 W0	Week 0	Non-anemic	Limited	Mild	159526	54038	1799.22	4719.82	46078.3	103658	54.64	179.96	49.99	6.31	14448.5	71.51	13.76	3.13	66.18	0.7	21.74	110.45	32.95	31.17	45.79	39.05	63.61	332.85	169.24	2950.11	89081.1	14131.4	5947.25	138964	1348.51	5954.94	25332.6	54.19	580.87
B192 W0	Week 0	Anemic	NR	Mild	87887.8	24277.8	800.14	5969.75	32508.5	136442	59.66	161.04	50.52	6.49	21764.3	43.72	5.97	3.21	106.3	0.45	19.84	98.2	31.71	31.96	51.95	37.1	204.57	279.61	600.77	4047.26	36720.9	24693.8	4391.41	147630	1202.96	5845.6	13528.9	95.96	1075.74
B205 W0	Week 0	Non-anemic	Limited	Mild	110021	13497.3	1964.53	3045.39	76289.1	111970	56.15	117.16	50.52	7.8	16100.7	66.22	8.97	4.45	81.4	0.64	13.02	75.99	38.2	43.1	66.01	45.43	88.64	318.11	120.29	3871.7	46348.7	5194.34	8789.42	178770	1639.75	3774.57	13485.6	56.68	759.5
B206 W0	Week 0	Non-anemic	Limited	Mild	101466	12003.5	178.16	2837.3	17164.7	53598.3	34.43	60.43	34.6	3.51	24210	32.66	6.68	0.12	40.08	0.01	4.84	75.99	20.52	16.16	35.35	20.26	177	141.93	32.36	1079.85	86830.6	5921.66	8331.54	115407	1073.56	4124.87	16691.7	52.79	1043.69
K030 W0	Week 0	Non-anemic	Extensive	Mild	93244.2	25124.5	1351.68	6457.29	22574.4	111929	56.74	173.08	56.13	6.9	26233.3	82.97	13.85	3.86	95.04	0.32	28.37	101.07	33.14	35.66	58.2	44.21	146.15	334.02	183	4885.46	28275	5984.04	11882.2	215111	2839.89	5571.71	24763.9	59.96	602.95
K032 W0	Week 0	Non-anemic	Extensive	Mild	137224	32679.9	704.74	4640.66	37240.4	93012.3	70.72	133.44	50.63	5.63	14068.1	52.02	8.36	2.76	90.27	0.74	18.06	101.07	28.47	29.22	55.59	34.31	118.76	169.26	219.54	16549.9	27543.4	5694.14	7513.08	97115.7	1943.27	3929.71	26898.9	54.35	607.95
K034 W0	Week 0	Anemic	Limited	Mild	193809	41495	838.09	6402.06	19198.9	127340	63.75	198.46	47.86	5	20492.4	56.99	8.13	0.12	104.59	0.11	14.62	85.29	23.76	14.19	68.56	44.21	72.34	181.59	356.35	4517.87	22055.8	11690.8	4192.73	41730.8	2094.71	5528.5	22157.7	67.39	389.02
K036 W0	Week 0	Non-anemic	Limited	Mild	111384	17370	740.67	2776.31	28604.9	52128	58.15	49.5	47.29	4.72	20108.9	47.02	7.26	1.15	84.39	0.98	17.62	94.67	20.51	33.9	44.7	18.68	105.24	203.02	69.25	2046.14	40939.7	6288.62	4396.89	114026	1148.67	2580.08	10313.4	34.2	594.15
K058 W0	Week 0	Non-anemic	Extensive	Mild	118304	38445.9	1027.53	7362.87	75243.4	64501.6	87.33	116.61	93.22	9.48	16470.2	57.27	12.23	3.26	101.55	1.8	23.44	143.37	30.44	77.27	75.07	43.7	128.05	285.24	191.81	8380.44	49611	5636.18	5409.06	136008	1740.4	12845.8	36482.1	58.78	669.56
K063 W0	Week 0	Anemic	Extensive	Mild	275318	64538.9	1329.54	12241	86595.8	117039	102.44	230.16	75.26	12.04	19377.3	69.53	10.04	5.55	137.6	0.09	23.44	185.62	49.04	66.64	78.96	59.52	113.39	452.77	323.6	6619.97	38934.9	18571.3	1284.72	208683	4431.97	8258.59	35953.7	111.83	693.18
T050 W0	Week 0	Anemic	Limited	Mild	140152	21004.1	1601.69	8531.07	45107.8	103500	67.79	167.05	55.74	7.32	22834.9	34.2	5.82	4.2	54.77	0.35	15.95	118.27	35.08	36.94	58.06	38.69	0.52	404.06	57.71	6797.82	31839.2	6440.8	9971.68	120962	1718.02	6570.39	27364.7	68.25	428.93
T061 W0	Week 0	Non-anemic	Limited	Mild	81682.9	9625.24	597.67	3849.56	15554.2	77569.8	33.81	117.04	38	1.67	14460.4	24.76	10.49	1	81.81	0.67	29.2	65.8	44.57	129.08	33.8	33.69	90.45	208.73	145.73	2284.53	65887.3	13814.7	5757.83	116536	1754.2	1657.95	9218.53	51.32	836.82
T076 W0	Week 0	Non-anemic	Extensive	Mild	95545.5	12695.8	1022.34	5899.98	36926.1	99832.6	46.86	73.08	45.23	6.42	16645.3	34.2	5.82	4.58	114.45	0.67	15.95	77.5	28.51	49.4	52.08	28.71	0.52	296.93	167.11	1920.93	24549.5	5808.01	6272.75	101382	1907.92	6113.17	18460.8	54.76	582.31
B055 W0	Week 0	Anemic	Extensive	Mod-sev	82646.2	25158	789.99	5626.12	26158.8	122928	53.93	141.59	30.42	8.01	22264.6	34.6	7.31	2.45	65.86	0.8	18.64	96.37	32.82	30.71	38.58	31.01	0.52	271.28	31.19	774.9	50812.9	12466.3	8753.97	116541	602.47	3154.46	16481.3	63.27	373.39
B063 W0	Week 0	Non-anemic	Extensive	Mild	73825.2	15756.6	696.4	5610.89	29074.3	93340.4	65.27	143.56	35.2	8.01	23890.2	37.51	17.06	2.45	71.08	0.07	16.95	81.87	43.19	28.41	49.58	45.09	100.17	243.09	41.24	2546.33	30657	7245.51	6685.22	133846	695.81	6287.93	21282	46.06	280.06
B093 W0	Week 0	Anemic	Extensive	Mild	434275	66942.4	1400.53	7215.61	60476.6	127177	126.55	161.48	68.19	21.52	18895.6	105.96	11.84	8.92	133.28	4.11	37.98	189.6	75.29	48.35	74.98	125.4	6.7	549.26	268.19	4161.2	37527	15075.8	3255.4	240268	2407.46	18683.4	104267	97.05	239.52
B102 W0	Week 0	Anemic	Limited	Mild	161377	12785.7	1156.16	4045.53	30872.8	102491	34.5	133.26	33.34	5.33	24802.7	31.33	10.14	3.13	79.06	0.01	15.02	78.22	27.98	22.06	37.88	25.76	140.88	259.2	343.01	3955.37	60427.2	10214.1	14117	135755	1074.25	4031.29	22096	46.64	344.46
B104 W0	Week 0	Non-anemic	Limited	Mild	98281.1	11101.9	733.64	4183.95	14288.3	130650	34.5	129.39	29.87	3.31	25830	31.33	5.56	2.76	53.14	0.01	12.41	72.24	17.84	19.96	29.84	32.56	0.52	214.13	77.02	4094.54	91531	10916.6	10941.7	104484	1551.02	733.8	7756.63	47.59	430.6
B110 W0	Week 0	Anemic	Extensive	Mild	37304.1	11281.5	920.31	3895.35	20203.8	97200.1	26.01	115.9	29.87	3.31	11726.3	24.9	7.78	1.17	56.42	0.01	12.41	60.11	42.77	17.83	27.13	14.57	0.52	168.2	68.81	2421.45	88894.5	7305.6	10710.2	131160	1500.36	2675	2428.57	42.82	420.76
B129 W0	Week 0	Non-anemic	Extensive	Mild	74566.1	16397.9	1577.77	4193.52	63824.4	138447	52.62	134.43	44.24	6.17	16298.5	48.67	6.21	2.59	63.61	0.45	16.53	67.58	17.02	16.16	37.74	45.43	28	234.3	108.69	786.02	103731	3578.56	9152.93	110402	2594.39	4825.63	17436.8	64.37	1030.86
B135 W0	Week 0	Anemic	Limited	Mod-sev	103078	25009.9	1385.79	2694.12	72759.7	123299	70.04	96.19	44.24	5.51	15880.9	35.61	6.68	2.27	66.17	0.26	14.22	103.72	29.51	11.57	63.68	37.1	104.29	247.29	382.53	4018.08	62331.9	8217.59	11790.6	145752	925.45	5775.28	28377.7	52.79	779.01
B180 W0	Week 0	Anemic	Extensive	Mod-sev	216205	42475.8	2117.64	2920.8	42301	108962	64.87	152.08	65.81	5.51	11102	81.48	7.84	2.43	61.03	0.83	24.03	84.36	32.8	29.72	44.87	45.43	116.76	273.17	257.92	6676.74	53962.3	10844.2	11808.7	188921	3090.54	8002.98	27711.6	68.17	1120.54
B188 W0	Week 0	Non-anemic	Extensive	Mild	147252	9437.41	805.48	6171.04	45234.6	118460	46.11	67.56	45.06	6.26	18413.6	49.44	4.57	5.79	99.82	0.53	19.67	103.7	33.14	22.79	63.4	29.22	0.52	193.9	180.4	7820.11	53093.6	11807.1	9067.48	119859	2004.98	2574.27	16984.2	74.77	592.95
B204 W0	Week 0	Anemic	Limited	Mild	55103.2	7196.67	387.47	2066.81	50814.2	105406	46.11	116.04	30.77	5	24943.7	24.62	3.05	7.5	56.67	0.11	14.62	80	33.14	22.79	44.98	23.99	0.52	181.59	101.24	2665.87	42065.8	3568.48	6930.72	116729	1377.14	3869.89	7497.35	34.3	753.28
K039 W0	Week 0	Anemic	Extensive	Mild	97865.9	26994.4	1210.48	6099.31	33280.7	141001	49.67	149.15	103.5	4.68	15420.5	41.18	5.31	3.7	99.82	0.53	21.22	82.65	28.47	27.08	52.96	31.78	17.23	193.9	107.93	4270.35	20182.3	7346.67	21239.1	112793	670.03	7598.58	21040.5	54.35	637.96
K059 W0	Week 0	Anemic	Limited	Mild	162160	15072	1390.65	4083.46	37426.2	113103	66.07	164.74	37.57	6.62	23201.7	30.88	12.47	3.26	78.57	1.46	38.59	109.11	24.93	73.3	50.07	43.7	29.64	278.97	109.99	4970.73	36363.5	6358.47	18819.4	146175	1196.8	5698.83	10847.7	41.76	806.88
K061 W0	Week 0	Anemic	Extensive	Mod-sev	272681	153537	1612.89	5134.49	60462.7	125022	83.51	201.85	103.51	9.8	16870.8	110.11	9.55	4.99	118.36	0.74	24.13	207.97	42.49	44.99	73.77	59.52	110.13	291.52	266.75	4244.68	41608.5	22358.9	2163.39	182507	2540.98	8590.31	44011.1	127.99	669.56
K065 W0	Week 0	Anemic	Extensive	Mild	207987	41017.2	1922.3	7285.78	41182.8	74448.2	68.03	143.78	44.08	7.26	14562.2	77.99	11.51	2.97	69.73	0.49	19.13	123.45	28.24	65.3	78.96	32.85	29.64	253.78	125.1	20152.3	26921.7	12294.9	4157.75	181057	2048.27	5017.24	28811.8	52.16	697.91
T088 W0	Week 0	Anemic	Extensive	Mod-sev	110523	93959.6	1009.06	4805.73	52380.7	75780.1	80.03	195.45	104.72	8.22	15567.1	75.01	12.07	6.85	108	0.67	26.8	135.67	41.45	31.8	66.97	38.69	172.39	304.74	130.9	3378.84	26942.5	5507.46	5841.34	248100	2379.56	5265.93	23195.2	83.59	613.05
T100 W0	Week 0	Non-anemic	Extensive	Mod-sev	124743	13886	1011.71	5503.93	49579.2	120692	88.1	174.65	62.58	6.42	18522.7	68.39	10.76	6.85	98.26	2.93	60.97	95.01	47.66	75.51	64.01	63.69	134.21	381.47	148.67	3458.92	38168.7	5397.41	6492.3	115299	1636.19	4215.52	19822.5	77.06	448.08
T106 W0	Week 0	Anemic	Limited	Mod-sev	189536	44062.9	1665.74	3432.99	39899.2	116410	71.89	197.66	72.62	6.87	25543.3	42.69	8.61	6.47	88.42	1.54	34.47	97.92	68.56	90.38	55.08	48.68	40.45	343.41	191.93	4536.87	43515.8	11479.5	8629.16	213076	1473.54	10355.2	35933.2	68.25	459.57
B026 W0	Week 0	Non-anemic	Extensive	Mod-sev	154419	116960	2338.82	8343.28	27716.3	109675	95.76	227.16	58.2	11.74	13740.6	96.83	10.19	2.45	120.36	1.33	33.01	181.95	57.86	57.86	73.67	82.68	72.8	339.94	137.74	5726.15	53359.3	9337.76	2546.61	180631	1302.95	4059.41	28511.9	85.29	326.38
B056 W0	Week 0	Anemic	Extensive	Mod-sev	213987	11474.2	845.4	6047.07	42350.7	118485	68.97	143.56	32.82	8.01	22529.5	24.64	10.75	3.9	60.64	0.07	41.52	78.9	36.79	65.11	57.7	51.72	106.26	339.94	19.88	6201.29	39496	15656.4	4756.94	70537.5	894.72	4525.63	19748.7	52.98	234.5
B060 W0	Week 0	Anemic	Limited	Mod-sev	82646.2	43715	1553.61	2353.3	147163	85857	76.26	147.52	42.24	12.55	31151.6	61.35	11.84	4.59	89.28	1.33	30.4	124.16	71.86	96.11	55	45.09	69.77	312.74	332.85	3418.18	24788.1	14028.2	5199.07	172366	3599.81	9127.6	34762.3	52.98	485.36
B076 W0	Week 0	Anemic	Limited	Mod-sev	87518.8	14134.4	1570.27	3519.98	44063.9	91695.5	46.72	118.78	40.13	6.31	22788	34.25	7.16	3.31	66.18	0.7	12.41	90.06	27.98	16.75	37.88	25.76	33.39	259.2	175.08	2913.02	66836.3	3924.87	8245.54	100146	584.62	5358.81	22126	27.13	450.08
B078 W0	Week 0	Non-anemic	Extensive	Mod-sev	145581	32276.9	1472.25	8343.85	37155.7	121849	36.58	113.97	33.34	3.31	6256.89	37.02	12.4	2.19	56.42	0.7	10.51	78.22	22.94	23.1	35.22	25.76	122.94	191.29	240.71	2266.21	48664.5	3605.05	35136.5	221480	1687.95	6284.58	26161.3	41.86	360.13
B083 W0	Week 0	Non-anemic	Extensive	Mod-sev	57521.5	15031.3	1258.47	6152.38	34503.6	90174.2	34.5	142.94	29.87	2.26	18755.6	31.33	8.38	2.95	72.64	0.31	14.18	95.93	30.47	28.18	33.88	18.49	93.41	152.65	39.28	3460.14	47197.5	5148.66	5860.24	127673	1248.75	3742.82	13954.1	37.02	415.81
B092 W0	Week 0	Non-anemic	Extensive	Mod-sev	213054	79301.5	1878.49	3380.23	265778	115343	80.27	164.65	86.48	8.76	16944.9	62.1	9.42	2.59	81.4	0.45	14.22	163.62	52.91	25.23	56.65	49.59	82.35	266.71	244.66	2030.05	54028.8	15083	2121.42	298947	3039.31	9614.83	44713.6	101.41	1114.15
B125 W0	Week 0	Anemic	Limited	Mod-sev	101466	24389.2	1967.31	1850.55	31424.6	107507	49.06	83.96	47.39	2.13	26262.8	29.55	7.84	1.79	145.21	0.45	7.83	84.36	13.44	22.97	36.54	28.73	44.21	168.61	55.99	4076.4	37696	12877	14875.4	217005	961.33	5419.12	34112	62.46	752.99
T116 W0	Week 0	Anemic	NR	Mod-sev	170716	65426.2	2430.44	6457.38	32964.1	145838	80.27	174.64	80.65	10.05	64808.5	53.36	5.73	3.68	91.42	0.64	17.1	163.62	25.06	38.66	47.23	57.88	175.47	286.05	187.38	2912.27	54649.2	14340.1	10568.5	209604	4430.8	7792.61	24840.6	71.94	1209.9
B139 W0	Week 0	Non-anemic	Extensive	Mod-sev	52098.8	24639.2	985.56	255.81	42975.3	123594	49.67	155.09	33.68	13.84	14208	94.39	21.89	2.76	90.27	1.96	51.71	220.23	50.32	31.37	47.66	29.22	48.54	255.1	73.09	3126.96	40935	4308.55	4503.98	182572	1189.76	4947.96	20044.7	56.22	662.99
B145 W0	Week 0	Non-anemic	Extensive	Mod-sev	72286.3	21812.1	633.56	1979.94	72437.2	78507.8	46.11	111.26	30.77	5	15793.1	46.78	6.98	1.77	34.89	0.32	8.6	95.82	28.47	12.05	50.31	51.46	14.14	144.51	139.21	1702.6	26175.8	5159.55	2429.12	113654	612.13	4481.38	10260.8	42.98	543.04
K025 W0	Week 0	Anemic	Limited	Mod-sev	97322.2	34974.2	815.95	1799.56	29233.3	86547.3	51.44	127.61	33.68	2.46	23968.6	61.72	8.82	1.77	56.67	0.53	25.62	69.39	26.12	44.23	40.94	23.99	102.7	181.59	269.72	2464.62	51514.9	16301.4	10231.6	200779	2251.59	3896.58	18238.1	78.45	662.99
K044 W0	Week 0	Anemic	Extensive	Mod-sev	136411	18073.2	768.54	4077.09	38545.2	113434	52.11	105.57	30.93	4.72	16807.6	500.14	7	0.14	54.64	0.23	7.14	65.32	22.72	26.84	52.73	38.32	49.51	177.41	62.34	7931.56	42302.3	3022.43	11076.1	171084	2111.86	5402.41	13314.2	26.63	773.66
T051 W0	Week 0	Anemic	Limited	Mod-sev	167661	28036.5	1320.09	3222.76	42549.3	99027.9	68.03	134.62	58.35	6.31	20540.6	83.35	8.03	4.13	84.39	0.23	16.06	109.11	11.6	40.86	50.07	32.85	11.22	203.02	50.13	2273.38	35968.1	8101.53	6652.69	188879	1019.46	6210.3	32788.1	43.65	565.95
T099 W0	Week 0	Non-anemic	Limited	Mod-sev	259964	20662.8	906.02	5036.55	22399	125990	56.14	96.87	42.46	4.72	15119	39.42	8.03	1.77	69.73	0.01	14.45	94.67	22.72	26.84	56.72	27.29	31.3	234.81	165.17	14658.5	30804.5	17047	8666.18	156345	2874.16	4069.64	24685.5	53.1	716.82
T109 W0	Week 0	Anemic	Extensive	Mod-sev	120501	31943.1	1608.94	3248.27	75967.8	142260	59.51	142.35	55.74	8.22	13214.3	57.94	10.23	4.2	88.42	1.54	26.8	100.83	41.45	51.84	55.08	38.69	62.12	273.31	419.74	9985.63	42131.1	6400.76	7635.71	141553	1808.9	5670.44	21001.9	62.67	413.61
T042 W0	Week 0	Anemic	Extensive	Mild	94567.1	25526.7	1020.34	5510.09	29952	98915.9	51.11	137.03	48.77	5.5	15905	46.68	14.88	3.42	88.42	0.96	15.95	83.34	18.13	44.47	61.04	28.71	53.65	426.48	60.04	6797.82	65743.8	10251.8	6754.44	139445	2108.5	7072.4	27068.3	79.24	428.93
B019 W4	Week 4	Non-anemic	Extensive	Mild	159725	9091.97	1326.89	6250.7	15738.5	144793	46.08	132.75	32.82	8.01	14570	52.66	9.63	1.34	86.69	1.64	26.28	78.9	31.48	46.2	46.86	58.18	57.65	299.02	29.76	2155.27	85647.2	7218.5	10058.9	107002	645.83	4248.17	13006	44.32	415.69
B053 W4	Week 4	Non-anemic	Limited	Mild	54205.1	8556.16	719.05	1906.16	6761.36	89728.9	29.27	86.03	18.03	2.64	8428.11	24.64	6.71	0.12	23.85	0.01	16.95	40.48	21.59	8.61	25.83	14.86	9.65	106.91	0.57	1382.65	69667.2	3442.97	6209.5	79819.9	1019.67	2181.35	9279.7	24.78	194.75
B081 W4	Week 4	Anemic	Limited	Mild	84198.8	16574.3	881.26	4814.1	25739	138129	50.04	141.59	30.42	5.41	23408.2	37.51	9.91	1.83	18.53	0.6	21.84	102.04	27.35	35.23	46.86	34.66	63.71	257.25	18.49	3064.32	70124.8	9095.6	11602	118088	382.64	2193.24	9295.31	40.82	370.76
B086 W4	Week 4	Anemic	Extensive	Mild	280941	79589.6	5178.18	3447.85	112080	132248	75.81	226.24	56.4	9.19	18388.4	60.02	10.14	4.91	117	0.7	8.4	147.47	36.65	31.17	27.13	51.41	103.28	288.86	90.22	6879.37	108838	9577.66	9422.11	124242	1529.63	5508.5	31586.1	70.81	454.91
B122 W4	Week 4	Non-anemic	Limited	Mild	91203.9	6476.09	798.92	2439.26	26534	110162	30.3	117.82	15.22	0.97	13245.2	17.19	9.27	1.59	26.36	0.01	14.18	53.96	20.4	30.18	27.13	18.49	0.52	168.2	17.83	1008.52	95384.2	3605.05	34601.5	197621	703.01	3572.32	9142.08	29.13	459.73
B123 W4	Week 4	Non-anemic	Limited	Mild	52306.2	9208.95	988.78	3591.39	16292.4	108969	34.5	122.64	26.34	2.26	12491.6	17.19	8.98	1.59	46.55	0.01	7.24	60.11	19.13	11.17	33.88	6.33	28.29	183.62	37.1	1189.69	71364.6	5907.1	7817.57	90439.3	1307.36	1942.86	7522.81	31.12	532.79
B138 W4	Week 4	Anemic	Extensive	Mild	115320	54766.8	1137.54	3064.05	182523	102933	87.01	149.4	59.75	7.47	18390.3	66.22	10.95	4.45	63.61	1.01	21.96	158.22	33.89	45.32	68.35	45.43	2.81	279.61	68.22	4509.89	43052.9	4381.88	11857.7	213814	1722.44	7427.97	23415.1	71.94	1114.15
B142 W4	Week 4	Anemic	Extensive	Mild	174710	10724.6	1565.48	3918.71	176743	120629	52.62	97.84	37.85	4.18	16627	62.1	4.75	1.31	71.28	0.01	16.53	70.39	27.3	236.61	40.12	24.51	69.72	234.3	103.61	2414.27	33259.6	6916.62	4544.75	158828	367.66	4274.83	15444.9	66.27	779.01
B148 W4	Week 4	Non-anemic	Limited	Mild	140828	6909.12	457.62	5249.78	22299.9	144845	41.84	93.72	31.31	0.97	33115.6	26.24	0.1	1.47	45.39	0.01	11.79	70.39	1.72	13.87	42.5	20.26	0.52	221.26	38.08	1257	69428.8	12898.1	4295.74	68391.5	1167.89	4358.06	12637.4	30.44	589.33
B157 W4	Week 4	Anemic	Limited	Mild	121222	9621.65	1184.15	2740.51	24917.1	104184	35.29	143.23	24.85	4.36	16316.2	35.11	9.04	1.77	42.17	0.32	14.62	61.39	12.9	18.49	50.31	18.58	96.29	132.09	18.32	1630.99	64458.2	10753.6	6905.99	95565.6	108.79	4086.36	12625.1	54.35	408.83
B185 W4	Week 4	Non-anemic	Extensive	Mild	54557	14042.8	340.81	4492.93	53474.8	127833	53.21	119.88	24.85	2.78	20944.5	35.11	9.27	2.11	66.3	0.11	16.38	80	23.76	18.49	44.98	23.99	117.15	156.9	87.92	1486.29	63838.1	5892.09	7034.05	103813	1450.34	2642.35	11178.9	27.42	622.95
K001 W4	Week 4	Non-anemic	NR	Mild	135055	45048.8	1452.62	2745.68	34678.4	119895	35.29	177.11	39.42	3.1	6460.63	262.32	3.57	2.11	42.17	0.11	23.47	80	20.19	31.37	34.09	39.3	0.52	212.31	102.91	3641.73	73711.7	7068.03	7361.15	205596	758.04	5638.22	24071	52.46	843.82
K038 W4	Week 4	Non-anemic	Extensive	Mild	113281	9619.57	1777.43	2868.37	28224.5	114353	48.03	73.6	30.93	3.47	16289	53.98	14.36	0.83	75.63	0.74	17.62	100.46	20.51	31.09	41.99	15.71	75.81	222.12	55.39	6805.43	54914.9	6469.83	6231.54	100019	933.69	4603.28	18984.5	43.65	650.68
T048 W4	Week 4	Non-anemic	NR	Mild	192959	18839	1039.06	3555.48	35832.5	105086	48.03	96.87	42.46	4.09	15009.2	66.59	5.94	3.84	121.13	0.74	16.06	83.01	17.18	38.09	63.31	43.7	9.53	190.24	125.94	2310.84	35770.4	2356.91	8918.02	105582	1347.23	4159.06	17160.1	32.31	603.56
T053 W4	Week 4	Anemic	Extensive	Mild	175414	28112.8	1226.41	1646.52	25863.6	94585.6	71.94	126.69	29.25	2.84	20750.9	168.29	16.2	3.12	75.63	4.59	99.09	80.09	35.92	184.52	47.39	49.03	22.97	329.02	141.82	3145.64	32163.4	7678.66	10696.5	165479	857.73	3446.51	13987.1	49.32	1280.45
T054 W4	Week 4	Non-anemic	Extensive	Mild	88413.1	11745.3	765.87	3474.95	26207	127974	42.56	177.92	34.31	4.1	9011.42	42.69	8.07	1.83	108	1.26	21.69	71.66	10.61	36.94	46.05	28.71	82.52	257.39	76.9	1920.93	91598.8	3687.75	4039.2	87388.4	1328.65	3883.2	9324.11	43.17	697.74
T064 W4	Week 4	Non-anemic	Extensive	Mild	94567.1	18257.2	1390.35	5907.94	32717.7	64184.2	42.56	77.08	45.23	6.87	15228.8	29.64	8.61	2.24	91.71	0.51	19.86	71.66	25.14	22.49	46.05	23.72	143.43	320.29	96.19	3657.08	43492.7	3389.31	3976.64	72758.7	1679.51	3019.88	12028.5	63.79	436.59
T008 W4	Week 4	Anemic	Limited	Mod-sev	201733	66060.2	4277.86	5392.96	59367.2	217161	84.07	242.3	75.92	9.11	14590.7	64.98	10.23	6.85	192.77	1.26	19.86	147.26	44.57	51.84	69.92	53.68	113.6	404.06	151.6	3696.38	48191	5562.32	1277.23	124450	1338.27	8428.85	54392.5	104.99	474.89
B038 W4	Week 4	Non-anemic	Limited	Mild	87817.1	7448.45	1023.1	2610.89	15549.9	135143	39.99	114.33	25.55	3.59	14374	16.12	4.83	0.39	39.68	0.07	16.95	66.76	30.12	18.92	35.79	23.34	0.52	184.97	17.79	1382.65	125221	4752.21	13820.6	52097.2	1030.82	2224.66	5791.44	26.59	290.29
B046 W4	Week 4	Non-anemic	Limited	Mild	31050.7	4268.69	1005.11	276.25	18741.3	73032.6	33.66	58	15.46	4.51	3636.65	4.15	5.47	0.12	29.14	0.01	15.17	140.28	21.59	11.31	24.37	6.33	0.52	123.25	17.1	1288.66	64795.8	5775.59	6295.85	62855.2	1370.16	1567.33	6336.59	17.37	512.43
B066 W4	Week 4	Non-anemic	Limited	Mod-sev	90913.8	8563.34	1224.48	2912.2	25365.5	36986.9	42.04	71.39	20.57	7.16	9547.92	31.51	7.9	0.12	44.93	0.01	13.29	66.76	21.59	28.41	38.58	27.25	39.54	199.76	0.57	1909.51	65825.4	11433.5	14128.9	89703.9	908.78	3603.06	14837.9	33.77	249.59
B098 W4	Week 4	Non-anemic	Extensive	Mild	102887	12686.3	533.81	6787.94	24449.8	129418	42.7	93.82	33.34	1.73	18207.1	17.19	3.86	0.72	22.91	0.01	12.41	53.96	15.26	24.13	31.19	25.76	16.29	183.62	0.57	2574.7	109755	3988.07	12028.3	77485.7	844.07	2313.66	5989.17	27.13	367.88
B101 W4	Week 4	Anemic	Extensive	Mod-sev	105302	19314.1	1697.74	3216.07	43203.7	107966	32.41	100.53	33.34	5.33	20862.4	28.23	7.78	2.38	91.81	0.31	12.41	47.74	15.26	17.83	32.54	10.32	0.52	152.65	57.38	519.28	61012.8	7360.16	13164.1	109485	1163.27	5088.14	15318.4	27.13	320.49
B108 W4	Week 4	Anemic	Extensive	Mod-sev	131039	20302.7	1166.32	3278.01	40991.6	132548	46.72	136.16	26.34	4.33	18753.3	24.9	15.88	2.76	66.18	0.31	8.4	53.96	20.4	22.06	29.84	32.56	140.88	105.05	151.69	2987.1	77612.9	5993.08	7882.4	116661	2350.92	1568.96	14714	44.74	395.85
B109 W4	Week 4	Anemic	NR	Mod-sev	115584	15596.8	499.02	5273.74	25894.6	95063	38.16	101.16	31.31	2.82	17193.8	41.12	4.24	2.27	32	0.07	13.02	64.77	5.81	29.72	35.35	15.97	0.52	181.85	31.65	2414.27	74815.4	11621.7	6015.95	166358	1752.5	4016.02	15303	64.37	915.02
B128 W4	Week 4	Non-anemic	Extensive	Mod-sev	132835	30829.6	1606.33	1536.81	57417.7	136408	41.84	112.91	44.24	5.51	21278	38.42	5.73	1.79	37.4	0.26	10.52	75.99	14.65	20.71	37.74	28.73	26.37	195.04	69.66	2850.79	61575.4	12453.9	9493.02	219461	563.36	5220.7	14805.2	56.68	1088.55
B167 W4	Week 4	Non-anemic	Extensive	Mild	66639.4	13784.5	588.44	5426.39	99618.6	35320.3	45.47	77.56	31.31	2.82	13700.2	26.24	0.86	1.15	58.45	0.01	13.02	81.57	10.98	13.87	36.54	20.26	0.52	108.13	45.23	1633.95	58375.5	4394.79	6208.19	97022.1	906.72	3462.32	15613.5	39.82	694.28
B178 W4	Week 4	Non-anemic	Extensive	Mild	144001	20048.9	1261.78	2861.85	40465.4	150188	49.67	120.85	45.06	4.36	23408.8	46.78	7.44	3.39	102.21	0.53	18.06	69.39	16.57	33.51	47.66	31.78	0.52	218.44	22.12	8132.19	65316.8	15757.4	12317.2	232373	1688.47	241.77	16159.4	65.54	652.97
B182 W4	Week 4	Anemic	Limited	Mild	73921	12482.8	1321.92	1733.51	182523	134431	35.29	110.31	26.34	3.73	16679.1	24.62	7.9	0.12	66.3	0.01	10.77	58.71	28.47	24.93	39.58	29.22	96.29	181.59	21.36	2192.33	118336	9957.99	12341.9	250636	663.64	3343.34	15692.2	35.28	683.03
B193 W4	Week 4	Non-anemic	NR	Mod-sev	57287.3	10704.9	633.56	1316.25	50858.7	45493.5	29.78	88.65	33.68	0.55	13207.9	24.62	3.57	1.24	56.67	0.32	12.76	47.95	14.13	22.79	34.09	18.58	0.52	119.63	23.65	1558.9	83285.2	1928.21	11146	119654	912.85	3107.81	13605.5	31.37	453.47
B196 W4	Week 4	Non-anemic	Limited	Mild	91264.9	14817.7	1313.35	3334.7	58636.9	91092.2	43.9	38.06	37.57	2.84	29366.2	30.88	1.9	0.5	38.93	0.23	15.26	100.46	13.84	21.1	50.07	21.59	0.52	291.52	64.07	3110.26	66372.8	6162.39	2081.91	98553	653.69	2320.19	9824.08	37.98	773.66
B201 W4	Week 4	Anemic	NR	Mod-sev	187900	75177.3	3106.5	2384.52	84324.3	113209	64.1	198.21	37.57	3.47	12524.9	53.98	11.02	3.12	63.75	0.01	14.45	151.86	24.93	25.42	50.07	38.32	88.91	209.4	63.21	4378.24	64437.2	8531.99	10301.1	197963	643.15	5151.94	30701	53.1	716.82
K047 W4	Week 4	Non-anemic	Extensive	Mild	149853	48133.2	939.27	2903.66	28172.7	125408	69.99	193.37	37.57	4.72	12870.2	255.66	6.47	1.15	81.48	0.01	12.77	83.01	11.6	47.73	47.39	32.85	0.52	253.78	96.5	4840.2	55919.4	9806.14	6860.5	177420	2133.23	4848.79	22022.6	64.45	731.02
T025 W4	Week 4	Anemic	Extensive	Mild	248044	54546.6	2537.44	4043.21	56353.2	130077	63.66	197.66	75.92	10.87	4089.85	42.69	12.32	4.96	152.5	1.26	23.45	103.74	41.45	41.98	61.04	58.69	113.6	225.12	84.5	8889.26	64573.3	9161.14	21082.7	119063	421.34	7220.76	40854.7	86.83	398.3
T075 W4	Week 4	Non-anemic	Extensive	Mild	84186.6	4370.5	903.16	3255.98	36274.2	132192	40.4	109.75	45.23	7.32	15996.2	19.47	8.07	2.63	88.42	0.01	12.7	77.5	38.28	23.85	46.05	18.74	13.41	192.14	66.89	1732.26	58714.3	2555.94	10787.5	102240	1344.3	3087.2	9525.84	33.57	620.74
T095 W4	Week 4	Non-anemic	Limited	Mild	71519.7	24249.2	1417.13	3000.99	33438.3	111632	42.56	126.47	45.23	6.42	11201.4	24.76	6.96	2.24	81.81	0.01	11.53	74.58	18.13	21.11	39.96	26.21	66.28	208.73	11.26	3053.43	41992.7	4127.1	5674.13	76464	933.74	2489.79	16967.9	43.17	375.33
B057 W4	Week 4	Anemic	Extensive	Mod-sev	140747	53287.7	3152.31	10427.9	42539.2	148748	76.26	224.02	39.91	11.33	20539.1	73.1	13.19	5.54	107.43	3.33	23.36	129.57	32.82	46.2	68.37	41.68	130.68	360.15	63.15	4291.98	91519.2	4975.85	6416.45	126636	640.76	2817.3	41053.1	73.47	199.67
B084 W4	Week 4	Anemic	Limited	Mod-sev	70702	25072.8	1606.93	3274.97	35643.7	117209	53.93	95.35	39.91	6.73	6621.64	42.94	14.76	2.75	65.86	0.99	16.95	84.81	67.25	28.41	38.58	23.34	106.26	214.37	55.8	3207.28	38135.5	4961.02	9913.49	99020.1	669.21	4916.51	24594.9	47.79	277.5
B085 W4	Week 4	Anemic	Limited	Mod-sev	98637.6	24963.8	959.04	12305.4	52598.9	171875	65.27	151.49	37.56	11.74	2636.54	47.96	6.71	2.75	107.43	0.07	15.17	102.04	34.15	21.35	69.7	38.21	30.53	250.18	194.2	5362.7	30242.4	15565.6	18686.2	87904	1749.73	4592.89	16714.2	71.77	373.39
B087 W4	Week 4	Non-anemic	Extensive	Mod-sev	84804.9	15465.2	1194.19	4688.79	36761.8	125432	44.72	162.38	29.87	2.26	21994.8	17.19	10.14	2.76	56.42	0.01	10.51	60.11	17.84	15.66	33.88	10.32	86.81	214.13	36	3134.17	81551.2	6782.3	4876.7	74027.3	668.91	2750.57	12246.6	40.9	442.8
B095 W4	Week 4	Anemic	Extensive	Mod-sev	69301.7	11933.8	1385.89	2151.51	41542.7	98087.5	44.72	122.64	29.87	5.33	12557.7	75.09	9.86	2.38	72.64	4.12	28.14	53.96	40.33	26.17	27.13	18.49	60.27	332.85	157.55	2266.21	50318.2	2909.3	5726.44	188180	929.19	4075.62	12949.9	25.1	385.76
B106 W4	Week 4	Anemic	Extensive	Mod-sev	136686	35788.7	1169.72	10336.7	37367.9	135942	50.7	146.82	53.21	7.28	9489.21	37.02	7.78	3.86	72.64	0.01	12.41	101.76	27.98	17.83	40.53	32.56	58.61	244.26	74.97	6311.7	84814.1	15460.2	10127.2	97640.8	2900.66	7675.81	37221.4	56.99	435.49
B107 W4	Week 4	Anemic	Limited	Mod-sev	93896.4	19826.8	1565.48	3103.06	182523	110547	49.06	113.76	41.06	5.51	17520	26.24	9.42	0.66	29.27	0.45	12.41	59.12	13.44	16.16	30.54	32.92	72.89	208.17	20.96	1566.53	92613.2	3672.44	6569.36	106859	1104.16	3767.33	17858.4	40.84	830.94
B111 W4	Week 4	Anemic	Extensive	Mod-sev	112145	16022.1	1257.65	2931.46	34957.7	121342	41.84	80.75	27.97	1.43	12372.9	32.66	8.75	1.31	23.75	0.17	11.79	59.12	10.98	29.72	20.82	32.92	31.27	73.66	97.1	4452.48	111703	6392.9	12665.4	226556	964.04	6516.05	20338.2	39.82	1139.72
B112 W4	Week 4	Anemic	Extensive	Mod-sev	50944.3	8152.91	834.32	3965.12	112645	85952.5	38.16	77.56	31.31	3.51	12172.5	43.72	3.47	3.83	34.71	0.01	14.22	81.57	13.44	30.84	47.23	32.92	23.08	305.31	24.52	1498.65	70884.8	3712.53	13850.9	108728	1284.61	3495.3	11854.8	39.82	960.14
B143 W4	Week 4	Anemic	Limited	Mod-sev	90796.6	28903.5	707.41	2406.3	153330	138790	56.74	139.31	27.83	3.1	16338.8	38.22	4.08	1.42	49.43	0.11	8.6	64.06	17.78	4.51	50.31	21.31	42.23	150.71	43.99	1114.28	109669	7156.91	4470.63	42068.9	532.54	5359.77	22732.5	41.07	523.11
B172 W4	Week 4	Anemic	Extensive	Mod-sev	336876	129320	12581.4	7202.3	182523	131961	94.84	256.81	74.94	12.58	2681.46	106.86	14.91	4.31	102.21	0.84	16.38	189.35	34.3	33.51	78.78	81.8	128.41	370.24	186.46	6142.52	131946	9453.72	7932.03	796647	2260.99	16977.7	120618	92.14	723.15
B189 W4	Week 4	Anemic	Limited	Mod-sev	142103	27042.4	1874.32	3662.36	182523	136958	53.21	134.42	36.56	4.68	17473.8	41.18	6.03	3.39	49.43	0.11	18.06	64.06	27.3	19.57	52.96	18.58	0.52	267.28	205.58	3191.96	79343.6	7321.42	12898.8	208800	449.81	6775.75	47305.5	52.46	622.95
B190 W4	Week 4	Anemic	Extensive	Mod-sev	176556	33110.1	685.46	2634.78	38358.2	118590	39.71	134.62	27.55	3.78	13381.3	53.98	4.85	0.83	60.73	0.49	11.01	56.36	10.47	19.65	29.62	32.85	0.52	85.84	0.57	2046.14	79289.3	8323.96	9467.25	64591	1188.91	5413.23	23294.1	28.52	519.03
K049 W4	Week 4	Anemic	Extensive	Mod-sev	122037	18808.6	703.39	2836.09	28335.8	132088	35.45	101.21	27.55	1.59	14916.4	430.64	5.4	0.5	22.21	0.01	9.15	62.35	16.07	31.09	31.02	15.71	0.52	164.53	64.07	1414.15	63039.9	2920.18	5358.75	121757	2385.37	4863.07	12984	26.63	787.89
T066 W4	Week 4	Anemic	Limited	Mod-sev	133080	16160.9	781.92	3242.82	35708	118381	52.11	141.48	29.25	1.59	22923.7	50.57	4.29	0.83	51.55	0.01	4.9	56.36	10.47	28.27	36.54	27.29	95.45	164.53	32.21	1656.33	16598.6	2954.36	10452	143349	799.29	2644.48	10493.1	26.63	702.63
T105 W4	Week 4	Anemic	Extensive	Mod-sev	141543	37707	2250.48	8410.92	47330.2	139250	71.89	160.57	67.63	11.75	15663	29.64	8.61	5.15	139.93	1.26	13.82	109.55	47.66	53.05	66.97	38.69	154.37	441.34	188.14	12431.4	35407.3	8175.04	10417.9	137512	446.66	9548.44	31557.7	100.75	390.64
T115 W4	Week 4	Anemic	Limited	Mod-sev	253656	86601.1	2371.13	6168.57	102139	90324.6	84.07	171.39	69.3	11.31	10716.8	110.98	6.39	4.58	133.6	5.33	37.32	187.75	331.52	82.42	74.33	48.68	21.4	657.75	153.55	4685.34	55397.9	3568.95	5816.31	120289	705.27	3594.38	43515.2	83.59	609.2
T117 W4	Week 4	Non-anemic	Limited	Mod-sev	142933	39434.9	2355.95	2591.27	43383.4	74067.9	59.51	130.68	55.74	7.32	11503.2	34.2	4.65	5.34	108	0.35	16.97	89.18	31.82	31.8	49.07	28.71	0.52	281.21	119.86	4083.83	54484	10496.8	3657.61	138752	1535.54	4859.37	38305.1	59.3	375.33
B001 W4	Week 4	Non-anemic	Extensive	Mild	154166	16788.2	1064.55	1712.82	29854.7	149124	57.76	106.69	35.2	8.85	30795.5	42.94	16.05	2.15	60.64	1.16	21.84	78.9	27.35	37.46	52.3	23.34	179.7	299.02	50.68	3348.33	58405	7886.86	14943.5	85368.2	1312.49	2101.66	11609.6	52.98	455.75
B088 W4	Week 4	Non-anemic	Extensive	Mild	108387	18580.5	820.37	4932.84	20118.7	129017	61.54	179.66	32.82	8.01	25095.5	52.66	13.98	2.45	86.69	1.33	24.84	107.65	43.19	39.67	52.3	61.34	136.8	353.43	66.84	3207.28	123617	6946.95	8543.48	116751	1109.71	2436.99	8574.83	57.28	378.65
B116 W4	Week 4	Anemic	Extensive	Mild	63130.4	11492.6	1530.37	4262.48	34924	93164.3	53.93	127.87	31.62	7.16	13103	16.12	7.31	1.17	60.64	0.07	6.59	72.89	24.51	23.74	41.36	31.01	81.91	228.8	40.52	2845.93	96716.8	7433.95	5080.25	68857.1	751.63	2348.97	12676	42.57	300.56
B164 W4	Week 4	Non-anemic	Limited	Mild	74846.4	9238.75	951.83	4673.33	33166.8	134615	50.7	123.6	29.87	6.31	15693.9	24.9	7.16	1.99	39.89	0.51	20.35	66.2	27.98	28.18	43.17	6.33	23.17	318.25	31.59	3243.55	123643	4939.99	10961.4	119037	1392.58	2976.54	11445.4	42.82	474.1
B175 W4	Week 4	Non-anemic	Extensive	Mild	49937.8	9445.69	720.92	2968.38	41925.7	118517	46.72	131.33	36.76	5.33	8731.82	24.9	9.86	2.38	91.81	0.31	15.83	72.24	34.19	23.1	35.22	18.49	50.24	214.13	31.59	4025.08	106111	3972.3	12962.3	130179	632.78	3451.88	13519.3	31.12	469.32
B181 W4	Week 4	Non-anemic	Limited	Mild	120623	29874.8	2345.16	3774.55	56448.9	131000	66.28	166.28	46.74	12.92	6055.33	75.09	12.4	5.25	91.81	2.8	25.68	101.76	78.63	41.8	43.17	123.11	53.59	347.4	87.18	3674.02	90480.8	15240.4	8147.09	164485	894.73	5023.61	22600.6	61.63	576.33
B192 W4	Week 4	Anemic	NR	Mild	96609.5	14261.5	905.78	3889.23	43565	126246	49.06	126.61	56.7	17.61	19919.7	32.66	6.68	1.95	71.28	0.45	8.53	106.47	18.2	20.71	91.55	45.43	153.92	247.29	86.25	4965.35	81049.7	18001.8	11547.8	117627	753.66	4298.73	9515.47	71	966.58
B205 W4	Week 4	Non-anemic	Limited	Mild	102541	10983.5	1961.76	2683.54	110327	136149	52.62	76.77	41.06	4.18	14026.2	38.42	7.61	4.45	53.26	0.64	9.2	87.13	19.36	20.71	47.23	57.88	14.79	208.17	51.69	3486.96	55314.1	5343.81	10998.3	84550.7	1187.76	3899.58	10615.2	57.65	766.01
B206 W4	Week 4	Non-anemic	Limited	Mild	103078	11206	212.58	4385.44	15571.2	75854.2	52.62	106.17	34.6	6.17	22042.1	22.67	8.97	0.99	66.17	0.07	7.83	87.13	20.52	15.02	44.87	24.51	297.29	208.17	30.93	1115.63	101247	8717.86	13631	86073.9	1393.56	3455.27	15343.5	73.82	1152.49
K030 W4	Week 4	Non-anemic	Extensive	Mild	72831.2	15195.7	1539.3	5199.67	22444	128329	63.75	166.05	42.25	6.9	21613.1	61.72	9.49	2.76	80.69	0.22	24.19	82.65	28.47	29.22	63.4	39.3	62.8	297.67	87.92	4332.43	66914.7	5388	19898.6	179229	3532.12	3314.23	13400.8	56.22	698.07
K032 W4	Week 4	Non-anemic	Extensive	Mild	133157	16609.5	838.64	4802.8	33478.2	122151	56.74	133.44	39.42	5	16827.5	41.18	6.27	1.42	87.87	0.53	18.06	90.56	33.14	24.93	52.96	34.31	80.31	163.08	63.29	6727.66	66080	11876.8	12364.4	115611	1267.93	2827.26	17985.7	60.89	773.38
K034 W4	Week 4	Anemic	Limited	Mild	216516	55222.2	1303.03	6974.78	29683.8	147794	74.19	201.53	58.86	8.16	19238.1	98.04	6.27	0.47	99.82	1.35	25.62	119.39	21.38	18.49	65.99	49.05	42.23	303.74	141.76	12516.6	32796.1	12662.1	6515.86	35045.3	1245.7	7315.43	27905.2	83.94	448.5
K036 W4	Week 4	Non-anemic	Limited	Mild	162741	15640.3	725.6	1853.23	38600.4	49254.2	62.12	60.36	34.27	4.09	18484.5	30.88	8.54	1.15	93.02	0.01	19.13	77.15	14.95	25.42	35.17	15.71	90.55	151.59	21.92	2084.33	67215.1	7890.8	6687.83	114188	1016.61	2733.13	12938.9	39.87	688.45
K058 W4	Week 4	Non-anemic	Extensive	Mild	89260.8	18325.7	821.09	5556.08	44646.3	73262.9	87.33	123.32	47.29	5.04	17013.9	30.88	7.52	1.77	69.73	0.23	23.44	94.67	27.14	29.68	55.39	21.59	54.45	278.97	67.52	4970.73	87379.6	4496.65	7837.94	83860.6	1512.98	4121.01	11396.5	34.2	830.63
K063 W4	Week 4	Anemic	Extensive	Mild	192398	39037.4	931.72	14128.2	183950	147865	102.44	181.35	75.26	9.17	17317.8	66.59	11.02	4.56	132.14	0.01	26.16	163.15	39.21	53.18	68.55	49.03	176.74	347.7	123.42	8795.88	35968.1	10428.4	4081.36	217286	1523.53	3863.89	21785.6	87.17	622.4
T050 W4	Week 4	Anemic	Limited	Mild	141543	18199.1	1577.09	6586.13	44191.8	125758	67.79	156.26	60.88	6.42	20246	38.54	4.94	4	54.77	0.96	15.95	86.26	25.14	44.47	64.01	28.71	0.52	366.31	55.37	9456.62	63500.9	6930.96	13888	123457	1664.19	6242.39	27921.9	64.91	436.59
T061 W4	Week 4	Non-anemic	Limited	Mild	99200.4	8394.9	643.61	4306.18	20275.2	108495	42.56	147.68	38	7.32	15013.1	19.47	16.38	2.24	88.42	0.96	28.41	77.5	38.28	56.67	39.96	38.69	82.52	175.33	65.76	2284.53	124704	13580.7	9122.72	116100	1468.61	1883.74	9913.13	69.36	910.49
T076 W4	Week 4	Non-anemic	Extensive	Mild	90143.3	10742.4	1451.1	5748.41	30712.8	121259	46.86	93.28	45.23	5.5	15953.7	24.76	8.61	3.81	104.76	0.67	19.86	71.66	18.13	48.18	49.07	38.69	92.41	273.31	133.88	2460.62	33221	5064.71	10381	91566.7	787.14	4796.52	15328.1	52.47	582.31
B055 W4	Week 4	Anemic	Extensive	Mod-sev	100179	18992.9	910.62	5666.93	37464.3	140350	61.54	123.98	34.01	8.85	22753	31.51	8.49	1.83	91.88	0.99	21.84	107.65	40.66	28.41	41.36	31.01	0.52	271.28	64.63	885.27	128801	18225.2	9410.63	118607	599.47	3475.4	18627.7	61.56	482.66
B063 W4	Week 4	Non-anemic	Extensive	Mild	80315.1	11492.6	1135.49	5784.67	24707	115960	65.27	155.48	30.42	9.69	26421.6	50.35	13.19	2.15	76.29	0.07	24.84	78.9	55.47	26.09	49.58	51.72	54.63	366.85	32.61	2845.93	114434	8385.75	9594.91	124296	1310.1	3523.43	12732.8	44.32	326.38
B093 W4	Week 4	Anemic	Extensive	Mild	257645	91503.8	1569.82	2849.79	50435.5	153492	107.86	179.66	60.43	16.51	14693.6	108.9	12.92	6.07	117.78	3.07	24.84	176.82	48.18	52.61	68.37	100.14	0.52	413.31	152.33	7713.64	64319.6	16693	5634.83	139940	1192.44	7288.26	52508.8	105.41	292.85
B102 W4	Week 4	Anemic	Limited	Mild	156282	12208.5	1545.3	5067.85	38471.7	142939	38.63	152.65	36.76	7.28	24727.8	31.33	10.14	3.5	104.45	0.51	17.41	90.06	30.47	21.01	37.88	25.76	158.76	236.76	82.11	2498.31	88148.1	6587.12	17128.7	108193	1520.3	3221.63	18767	40.9	425.69
B104 W4	Week 4	Non-anemic	Limited	Mild	114425	8708.35	684.18	2938.54	19291.7	137482	42.7	125.53	29.87	2.26	23158	28.23	5.89	1.99	33.17	0.01	10.51	66.2	13.95	24.13	35.22	25.76	0.52	152.65	23.68	2650.62	156203	15414	17024.4	111985	1057.11	650.56	6158.41	52.31	435.49
B110 W4	Week 4	Anemic	Extensive	Mild	45155.7	9908.74	1236.52	2663.24	17681.9	118492	17.05	113.97	26.34	3.31	10081.8	17.19	8.98	0.72	26.36	0.01	11.48	47.74	17.84	13.45	21.63	6.33	0.52	183.62	27.1	1189.69	139619	7401.02	13650.7	109842	1610.27	2471.66	1792.93	40.9	478.86
B129 W4	Week 4	Non-anemic	Extensive	Mild	62626.2	14861.7	1440.37	2405.07	32170.3	136823	49.06	115.46	31.31	2.13	13481.3	53.36	4.24	0.99	61.03	0.07	11.16	64.77	10.98	29.72	35.35	28.73	0.52	221.26	15.99	473.04	99030.3	2765.44	9142.27	88110.3	1686.21	3458.79	12103.5	48.85	908.57
B135 W4	Week 4	Anemic	Limited	Mod-sev	102809	13324.9	860.42	1936.1	43222.2	130417	41.84	90.45	42.65	4.85	12521	29.55	7.15	2.27	86.43	0.55	19.84	75.99	36.05	25.23	43.68	28.73	138.48	201.61	66.06	2973.55	103238	6344.88	15074.8	114526	1217.26	2897.82	13271.7	52.79	985.88
B180 W4	Week 4	Anemic	Extensive	Mod-sev	160672	26113.5	2203.59	2329.26	57501.4	128799	52.62	98.67	44.24	4.85	10228	68.23	5.97	2.9	34.71	0.64	18.76	75.99	25.06	18.44	40.12	35.02	40.99	221.26	137.01	8428.99	50840	5455.37	16031.5	265656	1484.92	5015.75	20093.3	36.73	1088.55
B188 W4	Week 4	Non-anemic	Extensive	Mild	95147.4	9834.22	930.38	5748.99	34795.1	128081	49.67	71.18	27.83	4.36	17282.2	35.11	5.31	2.11	61.49	0.32	10.77	80	24.94	14.19	65.99	34.31	0.52	187.75	60.86	3673.52	54982	5574.73	10497.5	82747.3	1312.76	1904.37	9307.31	49.63	723.15
B204 W4	Week 4	Anemic	Limited	Mild	58924.9	7304.59	737.98	1609.26	55948.8	131640	42.53	108.4	37.99	5.63	20017.1	35.11	4.57	4.61	61.49	0.01	14.62	64.06	26.12	14.19	52.96	39.3	0.52	181.59	58.43	2798.75	71302.7	4140.15	8742.02	102834	1411.65	3098.3	7696.95	38.18	733.19
K039 W4	Week 4	Anemic	Extensive	Mild	113079	15753.4	1247.49	4344.04	34024.8	155325	51.44	145.2	30.77	4.36	16489.3	46.78	6.74	2.11	80.69	0.11	18.06	85.29	21.38	24.93	47.66	34.31	0.52	144.51	23.65	2531.97	83763.3	5159.55	24732.9	138326	185.42	3401.77	10760	49.63	823.68
K059 W4	Week 4	Anemic	Limited	Mild	155153	13897.6	2940.31	2670.45	39164.6	127422	56.14	135.76	40.84	6.31	18775.2	47.02	18.92	2.08	57.7	0.86	20.6	106.24	24.93	39.48	58.04	54.3	72.53	291.52	46.6	3074.81	73918.1	4572.79	28654	192129	984.4	4191.07	9867.53	24.73	740.49
K061 W4	Week 4	Anemic	Extensive	Mod-sev	209644	109722	1804.28	7770.12	47680.2	172029	91.13	220.24	69.17	7.26	17484.5	100.83	13.42	3.26	81.48	0.01	26.82	219.11	33.73	44.99	86.71	59.52	121.54	297.78	250.91	10053.2	27664.3	12816.2	5241.03	158300	1264.42	6436.52	30930.6	88.12	631.82
K065 W4	Week 4	Anemic	Extensive	Mild	138220	15125.2	1198.6	7307.47	60641.6	102433	56.14	124.44	37.57	5.99	16367.8	53.98	7.26	3.12	98.72	0.49	15.26	88.85	33.73	44.99	60.68	41.02	62.68	266.39	64.07	3145.64	18710.3	10354.2	10602.9	201508	1416.99	3392.2	15470.8	30.41	802.13
T088 W4	Week 4	Anemic	Extensive	Mod-sev	85931.3	19358.5	1293.98	5543.51	39424.4	104001	55.33	140.22	45.23	5.5	14658.2	38.54	11.81	4.2	94.99	0.67	23.45	89.18	35.08	41.98	55.08	28.71	84.52	257.39	38.14	2373.01	65313.5	3024.4	13421.8	195343	1343.09	3488.59	16824	61.55	559.27
T100 W4	Week 4	Non-anemic	Extensive	Mod-sev	126153	7821.38	1305.09	4773.51	62585.7	144403	71.89	164.89	55.74	5.5	23135.8	42.69	12.58	5.34	101.51	2.11	33	89.18	35.08	49.4	58.06	38.69	132.36	381.47	75.81	3053.43	67036.9	5957.21	11490.2	100312	1573.08	2880.49	15710.5	70.46	540.08
T106 W4	Week 4	Anemic	Limited	Mod-sev	151242	18873.8	1997.56	6245.49	36278.4	143803	59.51	212.05	59.18	9.11	26948.4	34.2	10.23	5.34	101.51	0.96	33	100.83	47.66	63.82	52.08	41.18	16.16	381.47	127.9	6999.73	61481.4	6440.8	14437.1	172192	672.78	6653.34	29631.5	68.25	705.45
B026 W4	Week 4	Non-anemic	Extensive	Mod-sev	138463	187730	2589.02	6350.93	46674	101882	116.4	278.12	71.48	13.75	15189.4	117.45	11.3	2.45	138.43	0.99	24.84	222.34	57.86	41.86	86.78	100.14	145.98	353.43	84.69	10261.1	50257.3	4812.1	12868.5	130854	1246.16	3921.31	25298.3	95.37	175.17
B056 W4	Week 4	Anemic	Extensive	Mod-sev	185412	7719.34	865.53	2451.6	25168.4	166039	37.91	125.92	23.08	3.59	20134.3	24.64	9.35	1.83	73.68	0.6	23.36	66.76	15.37	23.74	32.98	51.72	51.61	169.96	0.57	3996.01	47180.1	12335.3	5335.14	48770.9	964.4	2766.13	12881.2	49.53	209.57
B060 W4	Week 4	Anemic	Limited	Mod-sev	60773.2	24066.3	1467.6	1570.02	33601.8	111249	57.76	106.69	35.2	6.29	24379.2	42.94	12.92	2.15	60.64	0.01	24.84	60.49	27.35	56.82	35.79	23.34	60.68	243.09	58.73	2992.07	59046.7	5589.2	3728.8	122840	1121.1	3766.17	22358.8	37.31	310.86
B076 W4	Week 4	Anemic	Limited	Mod-sev	82824.9	8490.45	1284.61	2854.81	34777.2	95289.8	46.72	137.13	36.76	4.33	23232.8	37.02	9.27	2.76	53.14	0.88	15.83	90.06	17.84	27.18	37.88	39.05	16.29	236.76	46.81	1494.14	98283.3	2598.83	16414.5	115043	356.42	3581.36	10818.6	36.05	511.86
B078 W4	Week 4	Non-anemic	Extensive	Mod-sev	83568	10580.4	2737.54	4180.93	32017.3	119004	34.5	129.39	29.87	3.31	7988.02	24.9	8.38	1.38	59.68	0.31	15.83	60.11	25.47	30.18	37.88	32.56	50.24	214.13	7.82	1662.4	101842	3311.25	28484.6	247527	425.35	4856.02	22800.5	38	425.69
B083 W4	Week 4	Non-anemic	Extensive	Mod-sev	67272.1	21781.8	1180.58	3316.08	28949.9	92623.2	44.72	113.97	33.34	3.31	15988.5	31.33	8.38	1.59	53.14	0.7	12.41	69.22	22.94	28.18	32.54	18.49	36.78	136.96	64.67	6722.64	49468.1	3507.78	3227.68	115714	1416.06	4677.97	15967.9	38	415.81
B092 W4	Week 4	Non-anemic	Extensive	Mod-sev	127903	31487.8	1365.86	3724.31	182523	155503	73.46	139.68	50.52	7.8	15332.1	38.42	8.75	2.27	96.4	0.26	14.22	139.25	29.51	29.72	44.87	37.1	98.04	273.17	113.04	2287.34	56644.6	5909.48	4323.57	148845	1405.5	5149.36	28644.7	70.06	1139.72
B125 W4	Week 4	Anemic	Limited	Mod-sev	136195	17947.7	1913.44	2355.09	47536.7	132559	50.85	107.01	37.85	4.85	21166.7	29.55	5	3.21	96.4	0.26	6.39	87.13	5.81	22.97	32.95	24.51	55.42	181.85	25.23	2287.34	48737.8	9503.02	23633.8	199968	1059.72	5551.13	35298.7	52.79	674.66
T116 W4	Week 4	Anemic	NR	Mod-sev	145696	15804.3	1374.57	5198.71	42826.7	171025	61.4	151.18	47.39	8.12	29979.5	26.24	8.75	2.27	66.17	0.07	15.39	103.72	7.14	25.23	51.95	30.83	98.04	247.29	38.08	1997.53	100079	8137.48	18482.1	163190	1446.54	3947.25	10668.9	58.62	1507.81
B139 W4	Week 4	Non-anemic	Extensive	Mod-sev	51825.6	27394.3	1173.18	318.71	60594.9	126117	53.21	143.23	45.06	7.53	15760.5	78.98	15.33	2.11	75.9	1.65	37.23	142.8	46.92	33.51	52.96	39.3	81.9	230.68	47.18	2599.05	45884.9	3334.76	16403.9	188311	1179.75	5959.07	16715	52.46	632.95
B145 W4	Week 4	Non-anemic	Extensive	Mod-sev	84811.6	11886.2	576.75	1807.8	89191	97560.5	53.21	98.94	36.56	3.73	13100.1	49.44	5.31	1.77	47.01	0.53	8.6	80	27.3	18.49	42.29	34.31	0.52	82	47.98	1413.15	67129.3	3713	7197.76	87088.1	307.52	2676.55	5841.87	35.28	622.95
K025 W4	Week 4	Anemic	Limited	Mod-sev	93788	16621.5	1236.97	1531.3	28695.9	110061	35.29	139.31	20.3	3.1	21491.5	35.11	9.49	1.06	47.01	0.01	19.67	72.05	14.13	24.93	34.09	34.31	109.12	156.9	48.78	1702.6	75333.9	20094	13461.6	131832	1099.73	2926.21	10052.3	66.47	843.82
K044 W4	Week 4	Anemic	Extensive	Mod-sev	146296	18570.8	974.65	4845.23	39374.1	142467	64.1	112.17	30.93	5.99	14136.9	57.27	8.03	4.42	84.39	0.49	16.85	100.46	20.51	39.48	39.28	43.7	22.97	260.09	84.64	11909.3	43443	3290.72	10615.9	192009	2456.93	5545.06	12937.1	25.68	669.56
T051 W4	Week 4	Anemic	Limited	Mod-sev	115171	12513.2	1091.3	3070.93	34973.2	106905	52.11	125.56	27.55	2.84	20506.9	53.98	7	2.08	63.75	0.01	20.6	71.25	19.4	25.42	41.99	32.85	4.42	215.77	26.65	1814.11	31817.5	6580.7	6422.23	172886	817.47	3801.65	18914.3	34.2	551.86
T099 W4	Week 4	Non-anemic	Limited	Mod-sev	202446	13253.4	963.88	2623.38	24650.1	134538	56.14	47.56	37.57	2.21	10715.6	5.31	7.26	1.77	45.31	0.01	11.01	94.67	17.18	33.9	36.54	9.53	0.52	228.47	84.64	7508.81	57478.9	14377.3	11710.6	153294	1615.17	3301.5	16924.3	51.21	745.23
T109 W4	Week 4	Anemic	Extensive	Mod-sev	44026.7	7839.72	342.93	648.84	10975.9	22807.3	15.26	23.16	14.59	0.97	3318.89	19.47	0.1	0.12	5.63	0.01	6.08	18.5	1.72	0.47	11.41	6.33	0.52	46.84	11.26	2547.43	32737.5	1937.24	5551	26179.8	408.69	933.65	3775.87	6.23	136.99
T042 W4	Week 4	Anemic	Extensive	Mild	107169	21838.8	1455.36	2762.81	25816	119970	78	176.83	48.77	4.57	13009.2	38.54	14.88	3.03	68.42	0.67	17.96	59.94	28.51	34.38	39.96	23.72	55.78	320.29	24.42	3135.59	82380.1	7995.85	11189	131240	2229.76	5024.21	20150.9	61.55	428.93
B019 W8	Week 8	Non-anemic	Extensive	Mild	134655	15015.5	2057.88	3769.15	23977	148715	42.04	126.89	25.55	6.29	20078.9	31.51	9.06	1.51	71.08	0.8	15.17	96.37	35.48	52.61	46.86	38.21	48.59	271.28	38.35	2809.04	108722	6672.78	10020.5	88371.5	961.1	2370.91	17005.2	44.32	490.76
B053 W8	Week 8	Non-anemic	Limited	Mild	69016.1	10230	601.41	1449.35	6691.54	88369.8	24.18	87.72	18.76	0.55	8053.4	31.84	5.55	0.12	17.78	0.32	10.77	37.08	21.38	3.44	19.76	6.59	20.33	119.63	25.19	762.25	109330	4027.14	8140.99	125550	1030.9	2397.15	10287.4	37.21	543.04
B081 W8	Week 8	Anemic	Limited	Mild	84974.6	14623.1	958.47	5235.41	20265.2	124992	50.04	151.49	25.55	5.41	22717.1	24.64	8.78	1.51	7.83	0.01	21.06	90.63	35.48	28.41	38.58	34.66	20.05	271.28	36.91	1909.51	103921	13539.2	13680.4	115260	272.97	2146.82	9912.66	47.79	429
B086 W8	Week 8	Anemic	Extensive	Mild	176583	31004.1	2414.05	2677.22	72003.6	120814	42.7	135.19	33.34	6.8	17296.7	42.21	8.98	3.5	72.64	0.31	5.97	81.2	25.47	22.06	24.39	25.76	66.93	183.62	40.36	4844.17	97862.2	6021.67	14568.9	113353	1338.19	3827.64	18072.6	38.97	440.37
B122 W8	Week 8	Non-anemic	Limited	Mild	98524.1	4618.06	744.48	1774.92	19792.9	109981	30.3	100.53	20.9	2.26	11155.1	31.33	5.56	0.12	12.34	0.01	12.41	35.02	20.4	22.06	18.85	6.33	0.52	121.1	0.57	915.44	102873	2737.87	36810.9	162912	748.83	2907.29	8141.37	21	502.49
B123 W8	Week 8	Non-anemic	Limited	Mild	52306.2	8900.03	1033.92	3030.25	12989.4	113491	30.3	131.33	22.73	3.31	12604.2	5.71	9.56	0.72	49.85	0.01	8.4	47.74	17.84	13.45	24.39	6.33	63.61	183.62	38.19	1189.69	82972.8	7793.37	7351.44	88113.6	1741.72	2047.72	7903.13	25.1	537.41
B138 W8	Week 8	Anemic	Extensive	Mild	78484.1	22954.2	972.17	3577.31	182523	97954.5	70.04	120.58	56.7	6.17	13980.7	48.67	6.21	1.63	55.86	0.26	12.41	87.13	22.8	20.71	40.12	49.59	1.14	227.78	28.08	2350.94	64381	3197.86	13648.9	192829	868.62	4312.59	15220.3	44.87	1126.93
B142 W8	Week 8	Anemic	Extensive	Mild	156631	10336.9	1109.76	2437.27	18753.8	90339.9	52.62	91.26	31.31	5.51	12390.3	32.66	2.09	1.31	55.86	0.01	7.83	64.77	10.98	19.57	37.74	20.26	64.97	141.93	34.5	1833.68	31036.3	4561.98	1307.94	93896	243.63	2726.88	11702.6	43.87	1139.72
B148 W8	Week 8	Non-anemic	Limited	Mild	143905	6687.28	472.21	4829.5	23855.9	148737	38.16	109.53	37.85	2.13	30109.4	32.66	0.1	0.32	50.65	0.01	11.79	70.39	2.98	22.97	32.95	15.97	0.52	221.26	51.69	1430.28	76933.6	9835.83	4062.32	84828.7	1406.49	4269.8	11958.4	40.84	674.66
B157 W8	Week 8	Anemic	Limited	Mild	153213	10941.9	821.47	3228.37	120507	109687	60.25	133.44	30.77	3.1	17170.9	41.18	6.51	3.08	71.1	0.32	14.62	58.71	27.3	29.22	42.29	44.21	157.46	156.9	32.95	2798.75	73711.7	13599.1	6712.34	121035	232.37	4799.72	12014.4	61.82	553.02
B185 W8	Week 8	Non-anemic	Extensive	Mild	50186.3	14454.3	352.64	5395.09	43570.3	122151	49.67	133.44	33.68	3.41	18238.1	20.5	8.59	1.77	66.3	0.11	12.76	85.29	24.94	18.49	47.66	15.77	73.93	107.13	65.73	960.3	87997.6	7522.96	8850.54	96031.9	1016.06	2960.17	7659.04	25.43	713.12
K001 W8	Week 8	Non-anemic	NR	Mild	100040	42628.6	993.67	2615.72	42096.6	139700	31.63	155.09	27.83	1.83	4440.66	66.26	3.57	1.06	47.01	0.01	16.38	74.7	23.76	31.37	39.58	21.31	0.52	181.59	106.26	3578.01	101955	9005.58	8624.61	201777	820.57	4267.26	17666.7	56.22	673.01
K038 W8	Week 8	Non-anemic	Extensive	Mild	134293	9105.3	1326.84	2330.6	30564	129460	39.71	73.6	37.57	3.47	16070	77.99	7	0.12	48.44	0.23	23.44	97.57	13.84	39.48	39.28	32.85	19.63	183.83	55.39	5868.83	82767.9	6691.1	8076.14	103769	591.68	4398.63	18938.4	37.03	726.29
T048 W8	Week 8	Non-anemic	NR	Mild	171116	10690.6	907.89	3668.01	40129.2	119628	62.12	112.17	40.84	4.09	15355.3	53.98	5.94	2.23	109.99	0.74	12.77	77.15	23.83	22.55	63.31	59.52	26.31	215.77	67.52	1735.55	83976.2	2247.37	12142.7	90816.7	1296.57	2873.02	11686.4	29.47	906.76
T053 W8	Week 8	Anemic	Extensive	Mild	199108	21818.5	1372.93	1769.7	38689	96640.4	87.33	153.04	45.69	4.72	20513.7	129.61	16.2	4.28	98.72	4.37	102.48	83.01	22.72	103.43	55.39	43.7	47.86	291.52	88.03	2932.25	85688.4	10527.2	19661.5	156431	1583.01	3943.35	16358.4	62.56	1376.85
T054 W8	Week 8	Non-anemic	Extensive	Mild	95056.5	12357.9	748.06	3898.32	37422	159925	38.22	151.96	34.31	8.22	12141.2	42.69	11.54	3.62	88.42	1.26	23.45	86.26	10.61	39.47	47.56	33.69	62.12	312.53	83.43	1635.87	97100.8	4300.34	5874.69	100607	1925.26	4117.67	10144.6	50.17	663.06
T064 W8	Week 8	Non-anemic	Extensive	Mild	67117.1	14724	937.82	5032.66	34972.9	56196.1	38.22	63.15	38	5.5	14735.9	24.76	6.39	1.83	88.42	0.67	21.69	65.8	8.59	12.56	36.89	18.74	102.13	257.39	50.6	1920.93	32323	2266.94	4395.98	35484.4	1339.48	2580.22	9818.14	45.52	405.96
T008 W8	Week 8	Anemic	Limited	Mod-sev	113862	57384.2	2703.67	3509.14	50434	173179	59.51	193.25	55.74	7.32	4042.73	64.98	6.67	4.39	133.6	1.26	17.96	95.01	16.31	23.85	49.07	28.71	78.52	273.31	58.88	2104.8	51423.6	2650.86	3474.41	83319.2	1436.66	5764.45	34671.4	66.02	344.71
B038 W8	Week 8	Non-anemic	Limited	Mild	75384.8	6439.61	853.78	2787.07	13425.1	137279	42.04	101	23.08	3.59	16398.5	31.51	3.14	0.12	55.41	0.07	18.64	69.84	24.51	29.56	38.58	23.34	0.52	184.97	29.05	1288.66	95900.2	3572.61	10576.6	59523.9	747.47	2088.79	4912.64	24.78	365.51
B046 W8	Week 8	Non-anemic	Limited	Mild	34815.4	4575.71	1406.82	417.06	16712.9	81131.5	42.04	50.15	20.57	4.51	4978.29	16.12	7.31	0.12	44.93	0.01	9.08	113.2	27.35	21.35	30.14	4.16	0.52	169.96	24.09	1474.57	119764	10958.2	5352.85	91230	1400.5	2474.6	9773.14	26.59	496.17
B066 W8	Week 8	Non-anemic	Limited	Mod-sev	80833.3	6602.13	1268.98	1960.4	17456.7	37070.9	33.66	50.15	23.08	3.59	7892.7	24.64	4.83	0.12	34.42	0.01	16.95	47.4	11.98	18.92	32.98	4.16	33.53	154.7	0.57	1696.61	49461.7	7701.15	14879.8	82596.3	1148.57	2671.18	10212.6	21.11	272.41
B098 W8	Week 8	Non-anemic	Extensive	Mild	127025	12729.9	577.72	4933.75	27498.4	135298	42.7	71.87	24.55	1.73	17544.8	17.19	6.53	0.72	12.34	0.31	10.51	63.16	15.26	17.83	32.54	18.49	36.78	214.13	40.36	1867.99	135924	6531.1	15323.8	78234.1	860.51	2860.95	7526.05	33.1	385.76
B101 W8	Week 8	Anemic	Extensive	Mod-sev	120148	16770.6	2382.67	3700.48	35605.8	100774	46.72	131.33	22.73	3.31	24790.2	24.9	7.16	1.59	66.18	0.01	14.18	78.22	15.26	22.06	27.13	18.49	1.14	214.13	40.36	723	71084.7	6078.77	12182.3	94478.7	981.9	4900.22	18633.6	25.1	454.91
B108 W8	Week 8	Anemic	Extensive	Mod-sev	107229	14016	1060.61	2002.61	33124	113771	30.3	131.33	29.87	1.18	15882.5	24.9	8.38	1.17	75.86	0.01	8.4	63.16	22.94	16.75	21.63	10.32	132.73	105.05	123.17	1662.4	77729.4	4424.04	10465	85550.4	1588.65	1067.14	8242.78	40.9	390.81
B109 W8	Week 8	Anemic	NR	Mod-sev	136711	14279.5	487.36	5055.75	30824.9	100028	49.06	92.9	37.85	3.51	24417.1	18.72	8.07	2.27	37.4	0.07	16.53	64.77	15.84	26.35	40.12	24.51	1.01	141.93	49.53	2127.1	94228.6	16328.9	9989.31	174548	1609.4	3767.33	16366	72.88	973.02
B128 W8	Week 8	Non-anemic	Extensive	Mod-sev	104686	25115.5	985.34	1243.06	145299	120304	41.84	92.08	27.97	2.82	20906.8	46.23	6.68	0.49	23.75	0.01	9.2	64.77	9.73	20.71	23.27	20.26	28	168.61	38.08	2030.05	45486.1	8468.42	11374.4	153540	475.07	3873.99	9597.79	35.7	889.19
B167 W8	Week 8	Non-anemic	Extensive	Mild	47667.2	12744.8	704.64	4998.93	128298	39206.2	45.47	63.49	37.85	2.13	13321.3	26.24	2.66	0.99	40.08	0.45	11.79	59.12	1.72	16.16	28.13	15.97	1.14	114.93	60.31	1291.94	79735.7	4842.22	7263.72	89183.3	549.35	3674.76	17232.1	34.66	766.01
B178 W8	Week 8	Non-anemic	Extensive	Mild	115793	13703.6	1474.79	3064.13	61473	161726	56.74	147.17	42.25	5.63	25483.7	46.78	6.27	2.76	83.09	0.11	18.06	74.7	9.15	27.08	46.32	36.82	1.14	181.59	10.15	5309.23	103595	11012.6	21686.2	212310	1338.2	319.84	15604.1	54.35	612.95
B182 W8	Week 8	Anemic	Limited	Mild	95419.3	11275	1167.71	1421.97	64748.7	121118	46.11	103.66	24.85	1.19	15223.5	20.5	7.21	0.12	56.67	0.11	10.77	37.08	16.57	20.64	31.3	23.99	53.29	82	32.95	1773.76	131029	9102.8	14716.7	266001	654.88	3891.49	12567.4	31.37	642.96
B193 W8	Week 8	Non-anemic	NR	Mod-sev	60289.4	9629.29	766.12	1348.84	39955	46854.6	35.29	86.79	30.77	3.1	17906	35.11	4.57	1.06	56.67	0.32	21.22	53.34	16.57	12.05	34.09	12.87	1.14	144.51	29.83	1630.99	97739.4	2107.28	13225.1	132467	725.52	3411.54	16617.5	29.4	533.07
B196 W8	Week 8	Non-anemic	Limited	Mild	106926	14978.5	1170.93	2972.47	56156	89038.7	43.9	102.29	37.57	2.84	22864.8	30.88	3.13	0.12	45.31	0.23	7.14	71.25	11.6	21.1	40.64	38.32	0.52	203.02	30.37	3286.44	125905	6386.36	3244.47	95325.1	784.79	2507.58	10872.7	43.65	802.13
B201 W8	Week 8	Anemic	NR	Mod-sev	219535	89160.9	3670.18	2377.44	86574.4	116929	69.99	183.74	40.84	3.47	13689.2	88.53	10.53	2.38	84.39	0.36	20.6	123.45	20.51	33.9	52.73	32.85	79.09	222.12	113.35	5294.5	67215.1	11672.3	9936.64	209027	1289.52	5734.77	37160.1	81.48	802.13
K047 W8	Week 8	Non-anemic	Extensive	Mild	177127	32344.9	1186.72	3187.37	30434.2	130970	56.14	155.37	34.27	2.84	12625.9	133.73	7	1.77	32.41	0.01	14.45	77.15	20.51	36.7	39.28	21.59	32.96	222.12	36.76	3145.64	107687	9326.93	13239.4	148609	1493	3102.02	16603.1	45.54	679.01
T025 W8	Week 8	Anemic	Extensive	Mild	189762	31378.5	2255.21	3308.71	30397	120468	55.33	156.26	50.53	5.5	2943.31	38.54	9.69	3.81	88.42	0.96	25.15	83.34	31.82	36.94	50.58	28.71	96.31	175.33	48.18	6594.49	55749.8	5259.26	15810.9	106733	301.27	5426.83	31630.3	63.79	306.42
T075 W8	Week 8	Non-anemic	Extensive	Mild	71004.6	4856.04	1098.6	2716.53	37316.7	142500	42.56	89.2	38	7.32	13734.8	24.76	8.07	2.83	61.63	0.67	12.7	77.5	35.08	22.49	52.08	18.74	51.49	225.12	45.73	1732.26	77025.3	3298.81	9247.2	106973	1977.59	3314.82	9872.4	40.8	613.05
T095 W8	Week 8	Non-anemic	Limited	Mild	71004.6	20114.1	1167.61	2872.43	44546.2	100434	46.86	97.37	45.23	4.1	10625	19.47	8.07	3.42	81.81	0.01	13.82	71.66	28.51	23.85	43.01	23.72	31.21	192.14	39.43	2970.7	49073.4	4386.46	7737.69	86139.9	1129.02	2190.71	13254.7	43.17	390.64
B057 W8	Week 8	Anemic	Extensive	Mod-sev	136687	28634.9	2261.28	7348.27	53999.5	142940	61.54	198.08	35.2	8.85	20012.6	57.11	12.38	4.18	91.88	3.07	21.84	113.2	38.09	46.2	60.38	48.43	115.41	319.58	39.79	2622.22	81012.9	5718.4	10217.9	126562	777.74	1910.12	29462.8	64.97	262.24
B084 W8	Week 8	Anemic	Limited	Mod-sev	76423.8	16579.5	1396.76	3312.78	34710.5	146305	50.04	96.29	35.2	7.16	6956.31	4.15	10.19	1.17	60.64	0.8	17.8	87.73	82.08	32.98	38.58	31.01	121.52	228.8	41.24	2353.38	42466.9	4048.61	11593.8	106402	671.25	3378.66	19174.5	37.31	326.38
B085 W8	Week 8	Anemic	Limited	Mod-sev	80833.3	16621.3	774.6	11445.1	182523	169557	61.54	132.75	27.99	11.33	6121.09	31.51	5.79	2.45	107.43	0.6	16.95	107.65	40.66	11.31	52.3	23.34	42.56	235.97	89.94	3278.04	31810.5	10478.2	17876.9	69264.4	1314.88	3831.22	12688.1	59.85	313.44
B087 W8	Week 8	Non-anemic	Extensive	Mod-sev	79346.1	14045.6	1323.3	7300.6	28656.5	140400	46.72	152.65	33.34	5.33	23785.7	24.9	9.56	1.59	59.68	0.01	8.4	72.24	20.4	13.45	35.22	14.57	132.73	229.24	48.94	2029.17	66509.3	6837.82	6634.81	72953.6	1376.99	3843.74	14127.6	49.48	497.79
B095 W8	Week 8	Anemic	Extensive	Mod-sev	50201.6	7663.82	1068.63	1694.74	30931.2	47178	30.3	82.35	29.87	3.31	10085.1	67.81	10.72	0.72	62.94	4.83	33.86	60.11	22.94	13.45	28.49	18.49	9.32	347.4	82.11	2726.11	82460.1	3010.98	9163.89	147484	679.11	3683.49	14127.6	25.1	385.76
B106 W8	Week 8	Anemic	Extensive	Mod-sev	165305	23886.2	1715.17	15491.5	53174.1	169751	56.6	154.59	46.74	8.72	10167.8	44.67	9.56	4.21	91.81	0.08	14.18	90.06	35.42	22.06	66.44	45.32	103.28	274.06	83.13	4642.18	131813	17939.2	15721.1	117595	3465.94	6295.23	38710.6	63.48	483.61
B107 W8	Week 8	Anemic	Limited	Mod-sev	86514.2	13905.9	1360.27	2853.58	175348	104940	45.47	90.45	31.31	3.51	14829.5	32.66	3.73	1.79	34.71	0.45	10.52	70.39	10.98	21.84	26.92	24.51	2.81	141.93	30.22	934.77	75581	2892.3	7705.02	91862.9	1267.19	3118.18	12769	28.29	1030.86
B111 W8	Week 8	Anemic	Extensive	Mod-sev	119535	11386.3	1573.24	1928.18	34551.3	127999	56.15	38.39	31.31	2.48	16390.8	26.24	2.09	0.12	20.95	0.45	14.22	70.39	2.98	15.02	37.74	20.26	14.79	128.47	52.4	3457.1	97936.7	7873.21	14589.3	80494	1438.5	5974.46	23881.3	42.86	1286.25
B112 W8	Week 8	Anemic	Extensive	Mod-sev	52128.5	6497.39	1068.68	2776.12	41668.9	95253.5	36.3	65.03	34.6	0.71	12911.7	48.67	5.24	3.68	40.08	0.01	13.02	87.13	5.81	16.16	42.5	41.27	0.52	181.85	13.87	1151.22	25343.8	3416.45	23140.1	150785	1188.71	3445.87	13259.7	36.73	998.74
B143 W8	Week 8	Anemic	Limited	Mod-sev	81545.7	20127.8	676.61	2224.65	68596.9	111010	35.29	129.55	18.76	1.83	16754.5	28.36	7.21	1.42	42.17	0.32	14.62	53.34	11.66	15.27	39.58	18.58	46.96	132.09	29.83	1037.72	121395	7182.26	3698.52	80629.7	756.41	3603.67	13909.7	35.28	597.95
B172 W8	Week 8	Anemic	Extensive	Mod-sev	430142	82908.6	11057	7245.5	182523	157114	67.24	183.18	53.39	11.32	6525.38	82.97	11.92	4.61	75.9	0.94	17.23	127.21	37.76	31.37	69.85	74.91	186.63	309.8	116.34	4702.2	112656	8541.19	11132.7	750273	2359.75	14076.1	115207	65.54	642.96
B189 W8	Week 8	Anemic	Limited	Mod-sev	127190	26529.8	1783.52	4417.87	182523	149849	53.21	133.44	35.12	5	13596.5	41.18	6.74	1.77	61.49	0.11	12.76	72.05	26.12	20.64	47.66	44.21	1.14	193.9	102.91	2798.75	110882	12845.7	16759.6	258490	497.12	7289.63	48161.8	58.09	622.95
B190 W8	Week 8	Anemic	Extensive	Mod-sev	167950	24589.8	710.58	1948.31	52460.4	115565	39.71	77.76	22.39	0.97	13287.6	39.42	3.72	1.77	51.55	0.98	11.01	71.25	9.35	10.75	31.02	21.59	22.97	99.17	0.57	2533.31	75806.5	6937.83	12231.3	61465.5	945.85	5608.01	23164.1	11.43	811.62
K049 W8	Week 8	Anemic	Extensive	Mod-sev	113281	17707.4	669.99	3348.44	26052.3	117811	48.03	90.43	17.08	0.97	14514.8	179	2.53	0.12	18.66	0.01	14.45	59.36	13.84	22.55	33.79	15.71	0.52	151.59	57.13	1248.34	112900	3406.25	5229.79	110336	1864.28	4750.55	10110	34.2	622.4
T066 W8	Week 8	Anemic	Limited	Mod-sev	156326	20751	935.5	4616.96	37399.7	142432	56.14	105.57	34.27	2.53	21826.3	26.07	11.51	1.15	69.73	0.23	12.77	77.15	11.6	40.86	28.22	38.32	52.81	164.53	53.64	2160.32	15309.8	3858.5	10118.9	171332	833.9	3827.94	15294.9	35.14	697.91
T105 W8	Week 8	Anemic	Extensive	Mod-sev	102109	28292	2278.9	4632.11	28821	122430	48.99	141.28	45.23	4.57	11994.6	38.54	6.39	3.23	101.51	1.54	15.95	89.18	28.51	36.94	50.58	33.69	40.45	273.31	30.12	7957.43	36741.9	6051.79	9167.75	112867	455.1	6239.54	26656	66.02	337.05
T115 W8	Week 8	Anemic	Limited	Mod-sev	274540	84540.6	2346.38	6661.22	79947.5	92073.3	78	192.15	80.83	16.05	10773.8	121.96	6.96	7.59	152.5	5.85	37.32	190.64	394.73	91.51	81.65	48.68	42.7	797.11	184.34	5123.99	63072.6	4386.46	5885.81	108766	775.07	3397.87	44007.4	83.59	647.67
T117 W8	Week 8	Non-anemic	Limited	Mod-sev	139224	26863.8	1704.59	2871.03	50948.3	92181.8	57.42	157.34	52.28	7.77	13564.3	38.54	5.24	4.77	81.81	0.96	21.69	95.01	35.08	34.38	55.08	23.72	0.52	273.31	76.9	2845.47	70527.1	7323.78	8472.24	144543	1600.76	4605.58	31372.4	52.47	436.59
B001 W8	Week 8	Non-anemic	Extensive	Mild	146322	14326.2	1159.97	1704.49	30043.2	139560	61.54	104.78	32.82	10.51	28381	47.96	13.45	2.15	60.64	0.99	20.27	96.37	18.55	27.25	94.59	23.34	115.41	285.2	21.28	2845.93	56535.7	9792.61	15359.5	88944.2	1076.84	3094.92	13159	58.99	426.33
B088 W8	Week 8	Non-anemic	Extensive	Mild	122440	19053	979.14	5216.55	24402	129948	53.93	189.86	27.99	8.85	23616.5	40.29	14.24	3.04	81.49	1.33	21.84	96.37	30.12	46.2	52.3	51.72	106.26	257.25	63.15	3962.73	148450	5196.97	8543.48	127854	1761.57	3019.45	10281.5	63.27	373.39
B116 W8	Week 8	Anemic	Extensive	Mild	80055.9	13214.3	1300.93	3136.12	22062.3	78961.9	48.07	114.33	25.55	6.29	13228.2	16.12	6.71	1.51	60.64	0.07	13.29	72.89	21.59	23.74	35.79	23.34	63.71	184.97	14.33	1992.5	83323.1	4048.61	9965.62	57159.6	920.71	3237.79	11521.4	34.65	244.55
B164 W8	Week 8	Non-anemic	Limited	Mild	83568	8638.69	1055.26	4870.68	25431.9	136830	50.7	146.82	29.87	6.8	18009.5	17.19	12.95	1.17	79.06	1.06	20.35	72.24	30.47	32.16	37.88	6.33	5.78	318.25	69.84	1948.92	145253	4592.47	12225.2	128437	1938.95	2378.92	9092.36	43.78	516.53
B175 W8	Week 8	Non-anemic	Extensive	Mild	47554.6	8623.16	662.11	2959.72	26440	124430	42.7	144.88	36.76	3.31	8857.86	24.9	11.84	0.72	59.68	0.01	10.51	66.2	32.95	27.18	35.22	14.57	53.59	191.29	101.28	2574.7	112936	3027.85	12342.4	116616	576.82	3550.86	10431.5	18.91	495.43
B181 W8	Week 8	Non-anemic	Limited	Mild	139969	21570.1	1819.07	3962.64	43762.8	132685	66.28	167.25	43.45	20.15	8672.93	91.75	15.1	6.92	110.74	4.83	32.2	84.16	122.85	79.46	43.17	193.96	16.29	433.69	42.52	3531.72	114163	11756.2	14610.1	170303	942.32	3921.03	21003	57.92	656.9
B192 W8	Week 8	Anemic	NR	Mild	96067.7	10847.6	1241.26	3468.18	33517.1	133967	50.85	113.76	41.06	4.18	19496.7	38.42	5.49	2.27	50.65	0.26	11.79	92.68	23.94	11.57	35.35	35.02	172.39	221.26	71.82	3635.68	73758.2	13903.8	13817.7	138783	1171.67	4243.44	8757	62.46	1062.93
B205 W8	Week 8	Non-anemic	Limited	Mild	102541	11525.6	1886.01	2560.86	138668	136149	59.66	67.35	50.52	6.82	14633.4	48.67	4.75	6.29	66.17	1.01	14.22	81.57	18.2	29.72	53.13	41.27	60.2	260.25	62.46	3694.9	61086.1	4613.18	12716.8	100189	1392.56	4764.15	13494.2	48.85	752.99
B206 W8	Week 8	Non-anemic	Limited	Mild	114792	11452.7	184.64	4350.4	9160.52	75188.3	49.06	113.76	31.31	4.18	25209	18.72	8.52	0.32	76.35	0.07	6.39	78.79	13.44	9.26	32.95	15.97	279.12	247.29	36.65	1151.22	108779	8229.02	13265.2	86348.1	1364.83	4787.66	15555.9	48.85	1222.64
K030 W8	Week 8	Non-anemic	Extensive	Mild	61380.7	12796.1	1043.93	5303.5	22825	124818	53.21	155.09	42.25	3.73	19224.2	46.78	5.07	1.94	61.49	0.32	21.22	74.7	26.12	16.34	54.27	39.3	43.81	249	56.81	3417.96	91639.5	5931.53	17388.5	153840	3495.46	4143.34	12693.8	56.22	688.04
K032 W8	Week 8	Non-anemic	Extensive	Mild	162962	18029.1	883.37	5554.78	36820.5	139614	63.75	153.1	36.56	5.63	16924.3	41.18	10.38	2.6	99.82	1.14	22.73	90.56	28.47	22.79	54.27	39.3	136.47	218.44	47.18	5787.55	111028	14278.5	16017.4	109565	1113.1	3492.44	21011.8	72.93	954.77
K034 W8	Week 8	Anemic	Limited	Mild	237047	34180.7	1139.26	7421.36	28687.1	159705	53.21	191.31	52.01	6.9	19821.1	70.64	5.07	1.6	90.27	0.63	16.38	98.45	14.13	14.19	62.1	51.46	80.31	230.68	102.91	4020.68	42979.4	10517.1	9748.97	33028.3	1379.05	4990.81	20925.9	71.09	523.11
K036 W8	Week 8	Non-anemic	Limited	Mild	173124	16699.9	745.51	1751.59	28892.3	52377.6	52.11	109.97	29.25	2.53	17834.8	30.88	8.03	1.31	72.69	0.01	14.45	80.09	10.47	31.09	32.41	21.59	36.28	158.07	47.48	2273.38	76532.4	7317.33	8529.53	122499	1508.77	2752.69	13191.3	30.41	697.91
K058 W8	Week 8	Non-anemic	Extensive	Mild	83176.8	16405.7	1068.67	5272.77	52610.4	75262.9	73.88	116.61	50.48	5.36	18033	53.98	9.55	1.92	75.63	0.23	23.44	117.73	33.73	31.09	58.04	30.08	32.96	291.52	49.25	4970.73	121397	5679.31	7713.25	79222.5	1809.22	3553.56	14431.1	37.03	902
K063 W8	Week 8	Anemic	Extensive	Mild	183663	24449.6	1008.99	11834.7	209441	167869	79.67	207.95	66.1	6.62	19380.4	60.47	7	4.13	126.65	0.01	27.48	134.85	38.11	50.46	84.13	64.71	192.93	366.33	87.19	3633.81	49261.9	10601.1	6389.6	170910	995.74	3171.88	15167.4	66.34	627.11
T050 W8	Week 8	Anemic	Limited	Mild	145939	14340.2	1287.75	5049.58	40098.2	122003	61.59	143.41	52.28	5.5	18326.2	42.69	3.74	2.63	33.6	0.67	15.95	71.66	21.68	31.8	59.55	28.71	0.52	328.02	43.24	4978.85	78130.2	5671.76	16168.3	114682	2041.31	4855.43	20179.1	50.17	543.91
T061 W8	Week 8	Non-anemic	Limited	Mild	106929	8637.81	660.46	4416.38	16088.4	112261	46.86	151.96	41.64	6.42	15542.1	29.64	12.58	3.42	114.45	1.26	52.21	71.66	44.57	98.26	43.01	38.69	124.91	241.34	117.83	2633.47	130151	11899.7	8421.66	118510	1737.37	2047.01	10397.8	68.25	999.93
T076 W8	Week 8	Non-anemic	Extensive	Mild	89155.3	7839.72	888.18	3696.09	29436.8	112261	46.86	88.19	34.31	4.57	14634.4	29.64	9.16	2.24	94.99	0.67	25.15	65.8	16.31	60.26	43.01	23.72	98.26	225.12	60.04	1635.87	48098.2	6400.76	11440	78539.3	808.04	3777.73	10348.1	45.52	551.59
B055 W8	Week 8	Anemic	Extensive	Mod-sev	119125	17630	1193.62	5301.94	30061.2	135919	61.54	161.48	30.42	9.69	21796.5	42.94	7.9	1.51	89.28	0.6	16.95	96.37	32.82	36.35	49.58	31.01	0.52	285.2	36.91	991.14	117434	13105.3	12613.8	121243	649.88	3651.55	17695.7	59.85	458.43
B063 W8	Week 8	Non-anemic	Extensive	Mild	78759.5	12637.1	965.35	5266.19	32420	126241	53.93	160.48	32.82	6.29	23876.2	16.12	10.19	1.34	55.41	0.6	15.17	78.9	39.38	26.09	41.36	31.01	57.65	271.28	15.71	2314.19	85912.2	6534.65	9575.67	110840	982	2840.11	9646.78	35.54	321.2
B093 W8	Week 8	Anemic	Extensive	Mild	317488	102081	1453.61	2503.69	63697.7	147966	107.86	189.86	67.09	15.73	17717.7	93.67	13.98	4.73	128.11	1.64	26.28	166.51	103.09	97.09	76.3	76.71	0.52	353.43	220.03	8753.18	78040.8	19385.9	5502.95	183211	1830.56	14976.4	64515.9	105.41	378.65
B102 W8	Week 8	Anemic	Limited	Mild	150242	12717.4	1720.99	2649.3	30599.3	127186	48.72	120.71	26.34	3.31	20053.9	31.33	15.62	2.38	59.68	0.7	12.41	66.2	25.47	24.13	35.22	39.05	76.89	183.62	33.8	2266.21	89967.5	7604.55	17190.2	101728	1232.3	3575.71	17493	38.97	393.34
B104 W8	Week 8	Non-anemic	Limited	Mild	110833	7069.38	719.65	2741.1	12633.7	141817	36.58	117.82	26.34	2.26	23459.1	5.71	4.56	1.59	39.89	0.01	8.4	41.43	17.84	23.1	27.13	35.84	1.14	152.65	0.57	1867.99	154868	14295.9	16993.7	113244	767.28	540.14	5295.45	54.19	454.91
B110 W8	Week 8	Anemic	Extensive	Mild	50201.6	9253.62	1279.79	3049.46	13797.6	122804	26.01	112.05	29.87	5.82	9382.19	31.33	6.53	1.99	62.94	0.31	10.51	60.11	20.4	19.96	24.39	10.32	1.14	168.2	51.06	1703.92	138917	8087.96	15475.8	106127	1468.59	2366.46	1851.08	46.64	518.86
B129 W8	Week 8	Non-anemic	Extensive	Mild	74566.1	13589.2	1437.84	2343.84	25494.4	144491	45.47	114.61	29.65	2.82	17052.5	53.36	10.08	1.95	61.03	0.64	22.48	70.39	21.66	21.84	37.74	45.43	1.14	214.72	24.52	786.02	156359	4252.33	14895.9	117720	1714.96	4592.99	15762.5	56.68	1165.26
B135 W8	Week 8	Anemic	Limited	Mod-sev	98772.2	10048.3	968.74	2305.3	68764.6	148255	57.91	110.38	47.39	4.18	14866.2	32.66	4.24	0.82	55.86	0.64	17.66	84.36	31.71	20.71	40.12	32.92	118.32	240.8	58.15	1997.53	133133	5933.83	20091.1	115077	1397.53	2940.42	13909.1	44.87	1165.26
B180 W8	Week 8	Anemic	Extensive	Mod-sev	171466	19688.4	2147.59	2126.46	86366.6	123680	45.47	117.16	41.06	4.18	9915.31	53.36	8.52	1.95	55.86	0.45	14.22	75.99	18.2	25.23	35.35	26.62	28	195.04	69.66	5414.53	54339	5393.45	17264.8	173047	975.77	5166.82	16904.3	38.79	934.37
B188 W8	Week 8	Non-anemic	Extensive	Mild	104659	9243.38	1082.96	6016.34	27283	138773	49.67	74.82	39.42	4.68	18400.5	52.02	6.74	2.11	95.04	0.32	16.38	74.7	24.94	20.64	65.99	44.21	0.52	206.18	64.11	3061.75	72996.1	5654.39	11482.4	89653.5	1159.82	2108.12	13646.6	42.98	693.06
B204 W8	Week 8	Anemic	Limited	Mild	69561.2	7933.02	1045.11	1699.62	101413	133841	49.67	157.07	33.68	3.73	20670.8	28.36	6.74	3.08	51.84	0.01	12.76	69.39	34.3	22.79	44.98	51.46	14.14	150.71	47.18	2019.55	99954	5267.29	9846.34	112634	1684.36	4034.78	8926.18	38.18	843.82
K039 W8	Week 8	Anemic	Extensive	Mild	128275	9834.22	1047.46	2847.2	23098.7	175974	35.29	142.25	35.12	0.55	17434.1	35.11	6.51	1.77	61.49	0.01	18.06	53.34	18.99	23.86	42.29	44.21	0.52	144.51	26.73	1879.69	112000	5388	25718.5	215724	148.69	3713.46	8458.02	44.89	838.78
K059 W8	Week 8	Anemic	Limited	Mild	171403	11885	1719.75	2626.55	29186.9	132565	48.03	178.96	39.21	6.62	17112.7	66.59	10.04	1.77	72.69	0.74	23.44	120.59	20.51	29.68	52.73	21.59	39.59	228.47	81.23	2007.82	63369.9	4633.46	29655.9	167955	1389.17	4529.63	7706.62	26.63	954.44
K061 W8	Week 8	Anemic	Extensive	Mod-sev	169966	64586.4	1182.77	5098.24	47326.9	142623	68.03	188.54	53.64	8.85	15901.1	60.47	15.28	3.41	63.75	0.36	17.62	129.16	16.07	39.48	63.31	49.03	121.54	247.47	123.42	6308.86	44683.8	11236.9	6986.93	109469	1041.39	3787.33	15999.2	75.8	594.15
K065 W8	Week 8	Anemic	Extensive	Mild	121417	11423.1	1023.69	6693.89	48539.1	96152.7	64.1	148.4	37.57	5.67	16276.3	30.88	7.52	2.08	98.72	0.23	15.26	77.15	20.51	29.68	50.07	21.59	106.87	266.39	74.4	3839.35	23102	8035.82	12132.3	213839	1659.46	3372.62	11438	32.31	916.29
T088 W8	Week 8	Anemic	Extensive	Mod-sev	86180	15008.8	1083.81	5355.67	31167.3	110075	63.66	124.37	48.77	6.42	13757.6	38.54	11.28	4.2	65.03	0.35	25.15	71.66	31.82	44.47	58.06	23.72	66.28	257.39	45.73	2803.4	93892.5	3207.84	12755	135522	1480.94	2401.1	13544.7	59.3	613.05
T100 W8	Week 8	Non-anemic	Extensive	Mod-sev	139456	7400.63	1266.3	4464.4	43766	143334	84.07	156.26	45.23	5.5	22340.2	42.69	10.76	6.47	114.45	2.38	31.5	95.01	31.82	59.07	55.08	58.69	90.45	335.72	63.49	2887.37	62739.7	5644.44	10671.4	97085.6	1669.29	2867.89	15010.2	72.67	551.59
T106 W8	Week 8	Anemic	Limited	Mod-sev	137133	14146.5	1846.3	6522.3	32770.7	155375	75.97	208.72	65.96	10	24532.1	38.54	18.84	4.96	120.86	1.26	21.69	86.26	50.72	44.47	58.06	33.69	124.91	381.47	108.65	7133.57	57347.8	8251.62	13429.8	155350	878.93	6774.81	25268.8	70.46	767.2
B026 W8	Week 8	Non-anemic	Extensive	Mod-sev	136687	76933.4	2062.11	6047.07	40486.1	119827	86.98	210.48	42.24	10.51	15887.1	76.75	10.19	0.81	97.07	0.07	23.36	145.58	43.19	45.12	68.37	76.71	84.95	285.2	26.92	2622.22	52872.9	2635.39	15623.6	137778	1658.63	2967.45	20988.8	60.71	209.57
B056 W8	Week 8	Anemic	Extensive	Mod-sev	226733	10281.5	1943.31	7159.34	30433.3	205101	76.26	233.46	39.91	10.51	29369.6	42.94	13.71	3.33	91.88	0.6	34.28	84.81	38.09	31.85	71.02	58.18	94.08	312.74	67.58	8155.22	85382.4	20577.5	5074.3	61126.3	1360.5	4128.34	24114.9	71.77	344.59
B060 W8	Week 8	Anemic	Limited	Mod-sev	56573.2	9968.62	1101.66	1195.72	21655	104596	42.04	87.88	20.57	4.51	22315.3	24.64	11.03	0.12	50.18	0.6	23.36	57.29	27.35	40.77	27.27	23.34	51.61	169.96	9.55	1382.65	65172.2	5832.64	7539.41	92704.2	664.12	2693.72	13360.1	24.78	326.38
B076 W8	Week 8	Anemic	Limited	Mod-sev	83320.4	9179.1	1031.92	2195.86	32377	91848	42.7	113.97	29.87	5.33	21957	21.27	7.16	1.99	46.55	0.01	12.41	66.2	20.4	19.96	27.13	10.32	9.32	183.62	0.57	1365.38	113550	3211.92	15583.4	109800	444.87	2842.67	9288.13	27.13	502.49
B078 W8	Week 8	Non-anemic	Extensive	Mod-sev	96578.3	8800.69	2118.56	4006.36	25237.4	141832	88.96	160.43	61.13	16.57	12638.2	81.99	19.96	6.26	107.6	4.12	28.14	136.17	62.04	45.55	63.88	91.2	51.92	376.35	0.57	2875.84	94029.2	4698.89	42364.5	213929	534.69	4776.52	17083.6	54.19	430.6
B083 W8	Week 8	Non-anemic	Extensive	Mod-sev	48085.5	18515.6	882.42	2966.8	35720.9	105845	34.5	106.28	33.34	2.79	13162.9	31.33	7.16	0.72	33.17	0.01	2.8	60.11	21.68	19.96	31.19	6.33	41.84	136.96	53.18	3531.72	23049.6	4238.52	7331.62	90103	1452.78	3697.16	16874.4	33.1	309.63
B092 W8	Week 8	Non-anemic	Extensive	Mod-sev	96880.2	18797.4	1425.88	2514.43	126079	164243	52.62	103.66	34.6	4.85	11595.9	38.42	6.68	0.32	50.65	0.26	7.83	81.57	10.98	20.71	37.74	41.27	40.99	155.3	38.08	1361.39	106627	5664.9	7724.22	102573	494.55	3867.91	22494.2	44.87	1146.1
B125 W8	Week 8	Anemic	Limited	Mod-sev	180678	12119.9	1918.94	2956.91	155785	150725	56.15	121.44	41.06	5.51	25613.2	32.66	10.08	4.76	125.87	0.64	9.2	87.13	25.06	22.97	41.31	43.35	203.04	208.17	42.37	2540.17	123941	14236.4	31149.8	252277	1502.2	5553.89	35774.7	66.27	985.88
T116 W8	Week 8	Anemic	NR	Mod-sev	124774	11505.7	1265.56	3485.24	20617.6	176653	50.85	137.93	41.06	4.18	32329.4	26.24	6.68	1.63	73.82	0.01	11.79	103.72	5.81	20.71	44.87	43.35	101.17	234.3	46.67	1899.49	107359	9391.61	21195.9	121752	1357.93	3413.03	7426.96	54.74	1381.4
B139 W8	Week 8	Non-anemic	Extensive	Mod-sev	43897.9	18705.5	1397.04	303.13	42289.2	139890	49.67	133.44	33.68	12.58	14271.1	82.97	11.7	3.39	63.89	2.36	44.16	184.19	42.35	31.37	55.59	34.31	34.38	267.28	55.2	2531.97	53356.6	3452.01	17122.8	180323	748.25	4514.74	13293.5	49.63	662.99
B145 W8	Week 8	Non-anemic	Extensive	Mod-sev	69288.7	10133.7	471.2	1514.55	40964	82491.6	31.63	82.16	24.85	2.46	11942.4	38.22	3.57	1.42	17.78	0.32	11.79	58.71	22.57	18.49	38.22	34.31	11.07	156.9	47.98	1037.72	99640.9	3597.48	5874.29	66294.8	465.02	1777.62	3349.98	23.42	572.98
K025 W8	Week 8	Anemic	Limited	Mod-sev	95147.4	14017.4	1162.25	1148.64	38280.6	101575	31.63	106.5	23.35	2.46	20193.5	41.18	9.72	0.25	63.89	0.11	12.76	47.95	9.15	27.08	36.85	29.22	112.33	144.51	29.83	1558.9	90680.5	10446	12209.4	117233	1249.4	3071.01	10032.6	52.46	773.38
K044 W8	Week 8	Anemic	Extensive	Mod-sev	159832	13486.2	1351.88	3912.98	61115.6	136911	52.11	128.95	44.08	2.84	15503.7	63.57	9.05	1.46	63.75	0.01	16.06	83.01	27.14	58.59	47.39	41.02	39.59	228.47	49.25	6990.05	74589.9	3746.82	13160.8	227457	1226.52	4179.98	11989.4	24.73	716.82
T051 W8	Week 8	Anemic	Limited	Mod-sev	124202	8627.1	1203.89	3482.13	49955.1	101432	35.45	61.37	34.27	3.47	18742.3	30.88	8.03	2.08	69.73	0.01	11.01	71.25	10.47	33.9	44.7	43.7	7.83	183.83	23.83	2046.14	61620.2	10773.1	9302.69	152753	545.07	4328.65	18174.1	34.2	749.96
T099 W8	Week 8	Non-anemic	Limited	Mod-sev	191837	9330.22	1233.72	3090.93	22257.5	142224	43.9	134.62	32.61	2.21	12210.5	60.47	12.47	0.14	57.7	1.69	46.5	59.36	18.29	58.59	39.28	27.29	21.3	215.77	55.39	2788.4	86718.3	11960.5	19485.9	137092	1332.99	2008.06	12081.1	41.76	1011.76
T109 W8	Week 8	Anemic	Extensive	Mod-sev	90143.3	11047.9	1133.69	1719.19	43553.2	130970	42.56	113.91	38	4.57	11072.2	46.68	6.96	1.83	47.82	1.54	25.15	59.94	28.51	31.8	46.05	23.72	4.13	241.34	82.35	3774.67	84022.6	3981.68	16646.6	112917	1317.84	2775.47	7785.2	36	467.23
T042 W8	Week 8	Anemic	Extensive	Mild	79922.1	13477.6	935.19	2299.31	19397.9	101889	29.34	122.27	26.72	1.67	11099.4	29.64	6.96	1.83	33.6	0.35	16.97	48.18	14.46	29.18	33.8	28.71	13.41	175.33	0.57	2195.15	71543	6825.53	9770.89	98020	1281.96	3374.09	10495.7	40.8	494.06
B019 W16	Week 16	Non-anemic	Extensive	Mild	128553	12857.8	1838.99	4054.47	19210	147545	46.08	157.48	25.55	5.41	18459.8	31.51	8.49	1.51	60.64	0.07	16.95	60.49	38.09	54.72	37.19	23.34	45.57	214.37	20.58	2469.72	110016	4327.37	9063.42	104561	1064.44	2474.6	14142.2	33.77	539.66
B053 W16	Week 16	Non-anemic	Limited	Mild	71222.9	10480.9	478.88	2344.94	6657.01	98783.6	42.04	99.11	31.62	4.51	10332.9	24.64	7.31	0.12	29.14	0.07	20.27	60.49	30.12	13.91	30.14	1.04	18.56	177.5	31.9	1093.29	55286.4	6617.61	5885.5	101070	2385.09	3010.19	11187.1	32.88	274.95
B081 W16	Week 16	Anemic	Limited	Mild	72264.3	9750.32	788.89	3243.6	9617.2	119230	33.66	125.92	20.57	3.59	18978	31.51	6.71	0.81	5.63	0.07	15.17	60.49	24.51	23.74	27.27	31.01	65.22	154.7	12.27	1909.51	85408.9	7083.04	12767.1	103988	285.18	1809.29	7103.2	31.99	378.65
B086 W16	Week 16	Anemic	Extensive	Mild	108913	12940.3	1533.2	2594.71	45608.6	121824	38.63	132.29	28.12	3.82	16247.6	37.02	10.72	1.99	59.68	0.01	8.4	72.24	20.4	17.83	21.63	32.56	56.94	183.62	21.36	2108.78	117402	8905.3	14011.9	108193	1479.16	2896.5	9743.34	38.97	481.24
B122 W16	Week 16	Non-anemic	Limited	Mild	104819	4420.98	857.72	1806.19	19745.8	122665	30.3	117.82	15.22	1.18	12892	37.02	11.28	0.12	5.63	0.31	13.31	38.24	22.94	43.68	21.63	18.49	0.52	160.44	0.57	519.28	119036	3556.5	35392.8	201659	1251.28	3118.27	8758.53	25.1	516.53
B123 W16	Week 16	Non-anemic	Limited	Mild	50201.6	8630.93	942.62	3602.19	9006.07	113026	21.61	131.33	19.03	1.18	11813.3	5.71	6.53	0.12	39.89	0.01	5.97	60.11	12.64	8.83	27.13	5.43	36.78	113.1	23.68	622.86	47860.3	3178.65	8638.96	85423.6	1513.64	2334.34	8501.83	15.73	548.93
B138 W16	Week 16	Anemic	Extensive	Mild	77926.1	9552.2	648.22	2659.39	49502.1	96941.6	47.27	67.35	34.6	4.18	15382.2	22.67	3.2	0.32	34.71	0.45	13.02	75.99	18.2	25.23	31.75	24.51	0.52	155.3	21.67	1667.49	120385	1915.4	26806.2	173103	1649.22	2757.76	10211.2	50.83	1279.9
B142 W16	Week 16	Anemic	Extensive	Mild	190074	7263.89	951.06	2104.46	282334	113966	45.47	125.74	27.97	3.51	17020.1	26.24	4.75	1.31	45.39	0.01	12.41	64.77	10.98	40.88	32.95	15.97	88.64	208.17	42.37	1566.53	76076.7	4766.12	7482.22	112315	257.63	3871.56	8033.02	46.87	979.45
B148 W16	Week 16	Non-anemic	Limited	Mild	170215	7416.39	415.72	6756.78	24290.7	154402	49.06	136.17	34.6	0.71	38525.9	26.24	0.1	1.31	78.88	0.07	14.22	59.12	8.45	20.71	40.12	24.51	1.14	266.71	43.08	1767.5	120822	11761.1	3794.11	82906.1	1577.17	4172.16	12911.3	46.87	733.44
B157 W16	Week 16	Anemic	Limited	Mild	105474	7881.81	2194.85	2503.68	25193.8	180131	46.11	102.71	33.68	4.68	21346.9	35.11	7.44	1.77	61.49	0.11	19.67	61.39	33.14	19.57	31.3	12.87	14.14	181.59	43.99	1376.36	55340.4	3007.89	8500.48	143053	1194.31	4125.18	18009.5	37.21	929.53
B185 W16	Week 16	Non-anemic	Extensive	Mild	48273.1	8920.19	252.26	3262.38	25489.4	93970	35.29	97.06	21.83	1.83	8969.56	10.08	5.07	0.25	56.67	0.01	12.76	58.71	14.13	8.82	39.58	12.87	31.24	119.63	32.95	1037.72	69275.6	7283.51	11054.8	80451.5	1089.95	2023.3	3702.56	31.37	763.33
K001 W16	Week 16	Non-anemic	NR	Mild	116879	25092.2	961.31	2121.61	50636.5	107573	31.63	135.4	27.83	1.83	5336.39	86.87	5.55	1.06	66.3	0.01	16.38	64.06	17.78	24.93	28.48	18.58	0.52	230.68	51.18	2329.08	113532	6258.29	10100.9	154317	817.25	4609.96	19255.5	39.14	823.68
K038 W16	Week 16	Non-anemic	Extensive	Mild	106926	7529.56	683.08	2407.63	23721.6	110109	41.81	63.38	24.12	4.09	15149.5	60.47	9.8	0.83	22.21	0.23	19.87	80.09	13.84	22.55	39.28	21.59	0.52	164.53	65.8	6805.43	68340	6162.39	6435.82	90965.2	666.9	4293.8	9697.46	39.87	754.7
T048 W16	Week 16	Non-anemic	NR	Mild	143914	6737.55	799.02	2464.57	21368.2	107802	43.9	80.89	24.12	2.21	13706.3	57.27	5.4	0.5	78.57	0.98	14.45	71.25	9.35	19.65	44.7	27.29	0.52	177.41	44.82	1373.06	117270	2210.54	13953.4	73612.6	949.6	1899.54	9210.21	34.2	911.53
T053 W16	Week 16	Anemic	Extensive	Mild	171403	9509.55	1277.08	1155.91	15628.2	87142.8	48.03	77.76	27.55	1.59	18838.2	77.99	7	0.5	63.75	2.15	60.12	47.29	12.72	46.36	31.02	24.46	36.28	203.02	39.46	1495.68	73530.8	12080.2	16257.6	118842	504.03	2167	8289.06	39.87	1002.2
T054 W16	Week 16	Non-anemic	Extensive	Mild	82435.4	9745.18	936.5	5324.61	22667.5	149960	42.56	161.65	38	4.57	12395.8	34.2	9.16	2.03	111.23	0.96	19.86	71.66	25.14	31.8	46.05	23.72	86.5	249.38	56.54	2284.53	139297	3598.72	6923.03	88514.4	2003.27	4207.97	9730.1	40.8	860.06
T064 W16	Week 16	Non-anemic	Extensive	Mild	61596.6	17153.7	772.24	5025.9	24863.6	51177.6	38.22	47.56	38	4.57	14936.4	24.76	5.82	0.56	61.63	0.96	21.69	62.87	6.48	23.85	52.08	13.77	130.5	249.38	63.49	2059.25	42407.9	2587.65	3672.79	47285.2	1332.26	2523.21	10146.3	43.17	490.22
T008 W16	Week 16	Anemic	Limited	Mod-sev	55699.5	14204.7	1064.37	1614.61	16958.3	100187	29.34	107.68	18.77	0.97	7666.37	19.47	4.65	0.56	47.82	0.19	18.92	36.37	1.72	21.11	24.41	18.74	38.18	123.23	0.57	1127.26	29925.4	1544.01	2652.77	65097.5	1322.64	3122.16	10897.9	31.1	298.76
B038 W16	Week 16	Non-anemic	Limited	Mild	89882	6585.16	666.4	3056.14	12852.8	130887	33.66	121.07	23.08	5.41	18785.5	16.12	5.47	0.39	50.18	0.01	21.84	72.89	21.59	23.74	30.14	14.86	0.52	214.37	47.04	1192.32	82323.8	3764.85	12991.7	66220.4	866.76	2094.15	5847.24	30.2	394.48
B046 W16	Week 16	Non-anemic	Limited	Mild	39630.8	4663.65	1744.51	442.71	16077.5	101327	46.08	65.99	20.57	6.29	7364.01	16.12	9.35	0.81	60.64	0.07	20.27	102.04	27.35	23.74	32.98	10.03	42.56	214.37	60.2	2074.4	104310	15633.7	8404.75	88184.1	4394.57	2710.66	12407.2	37.31	600.04
B066 W16	Week 16	Non-anemic	Limited	Mod-sev	79537.4	4674.55	865.53	1858.49	14004.6	59286.4	33.66	87.88	20.57	3.59	9250.04	31.51	7.9	0.12	29.14	0.07	13.29	54.05	11.98	21.35	27.27	23.34	57.65	106.91	0.57	1474.57	72933	13609.3	13397.6	90938.5	1192.44	2867.53	7812.48	37.31	280.06
B098 W16	Week 16	Non-anemic	Extensive	Mild	92183.7	9372.1	461.57	4788.01	19211.4	123513	34.5	64.25	22.73	2.26	16467.8	4.15	5.23	0.21	26.36	0.01	10.51	53.96	12.64	5.11	29.84	32.56	78.55	229.24	7.82	1451.48	131957	3781.76	15673.2	66247	977.09	2127.95	4592.05	21	354.93
B101 W16	Week 16	Anemic	Extensive	Mod-sev	121098	12692.5	1418.78	3375.06	31241.6	104924	38.63	116.86	33.34	2.26	24771.5	5.71	5.23	1.59	62.94	0.01	14.18	60.11	12.64	19.96	28.49	18.49	0.52	244.26	16.63	772	94449.6	5705.3	12709.2	90187	989.13	4775.3	11507.4	27.13	450.08
B108 W16	Week 16	Anemic	Extensive	Mod-sev	119434	11061.8	1696.29	2442.04	32714.2	131054	34.5	135.19	31.62	10.13	19471.2	24.9	16.14	1.99	75.86	0.01	8.4	66.2	20.4	8.83	24.39	18.49	114.76	105.05	57.38	2574.7	102592	8669.86	13259.5	73000.8	1564.43	1490.3	11940	34.09	488.35
B109 W16	Week 16	Anemic	NR	Mod-sev	133612	10635.2	648.22	5606.2	16739.2	103869	38.16	75.97	27.97	4.51	23638.9	18.72	3.73	1.63	45.39	0.07	13.62	64.77	15.84	27.48	35.35	20.26	18.12	168.61	11.04	1633.95	97471.9	16115.5	7041.19	158611	1865.93	3103.35	11533.4	71.94	1037.28
B128 W16	Week 16	Non-anemic	Extensive	Mod-sev	131021	14684.5	897.35	1241.48	73570.4	123604	38.16	83.16	27.97	2.82	20924.9	32.66	3.2	0.66	37.4	0.01	12.41	59.12	15.84	18.44	26.92	13.8	36.14	175.24	17.41	1186.65	78333.5	11406.7	14387.5	130887	609.79	4360.59	12836.6	40.84	1088.55
B167 W16	Week 16	Non-anemic	Extensive	Mild	40706.3	9094.23	696.61	4931.7	148367	39361.3	52.62	65.03	31.31	2.13	13798.1	48.67	3.47	0.99	61.03	0.45	10.52	61.95	1.72	16.16	32.95	24.51	18.12	101.3	39.51	1079.85	86008.5	5269.18	9192.88	97069.4	679.47	3606.7	13081.6	40.84	674.66
B178 W16	Week 16	Non-anemic	Extensive	Mild	75555.3	6903.87	1138.05	2155.05	23496.8	122561	31.63	106.5	36.56	4.36	24554.2	15.82	4.82	0.68	44.59	0.01	18.06	50.65	3.95	24.93	42.29	18.58	0.52	181.59	16.07	2765.62	111368	8639.32	19423.6	184025	1247.55	283.23	9499	48.69	863.97
B182 W16	Week 16	Anemic	Limited	Mild	83723.1	8606.54	1135.64	1352.16	25267.3	132347	24.18	97.06	18.76	1.19	15749.7	28.36	9.04	0.12	37.32	0.01	8.6	37.08	18.99	27.08	22.72	18.58	51.7	107.13	27.5	1339.42	129593	12408.9	16595.8	287693	658.06	3945.03	11182.3	44.89	843.82
B193 W16	Week 16	Non-anemic	NR	Mod-sev	28554.1	7709.65	638.26	1333.94	66758.1	50950.1	31.63	75.74	24.85	1.19	18302.8	24.62	4.08	0.25	22.69	0.01	16.38	53.34	6.59	12.05	25.62	18.58	0.52	132.09	34.51	881.91	102172	2042.53	12007.6	111555	839.69	2851.62	11511.9	27.42	543.04
B196 W16	Week 16	Non-anemic	Limited	Mild	120795	13849.1	1140.77	3512.27	55638.2	108305	39.71	116.61	30.93	3.78	27733.1	39.42	4.01	0.5	75.63	0.09	12.77	97.57	17.18	33.9	44.7	35.59	0.52	190.24	25.72	2122.38	161093	7195.9	4805.26	82287.4	929.96	2733.13	11830.3	37.98	1165.07
B201 W16	Week 16	Anemic	NR	Mod-sev	139723	29156.7	2310.83	2499.19	70443.5	94141.3	39.71	109.97	20.64	0.97	13865	47.02	8.03	1.77	45.31	0.23	24.13	71.25	20.51	36.7	39.28	2.62	54.45	222.12	4.15	1969.37	97807.6	8713.01	15549.2	191293	583.01	4116.11	22160.8	43.65	811.62
K047 W16	Week 16	Non-anemic	Extensive	Mild	141223	21231.4	837.09	3022.79	16949.5	127559	39.71	154.2	20.64	0.97	11520.7	66.59	7	0.12	57.7	0.23	11.01	59.36	16.07	28.27	41.99	9.53	0.95	215.77	0.57	902.96	113346	6162.39	19327.7	152091	763.13	2387.17	9030.86	36.09	749.96
T025 W16	Week 16	Anemic	Extensive	Mild	146632	17254.6	1862.79	3811.79	37911.8	125002	63.66	143.41	43.44	7.32	2559.07	34.2	12.84	3.81	101.51	1.97	29.2	83.34	23.42	29.18	52.08	33.69	154.37	192.14	30.12	1180.57	81933.3	4199.44	32055	97561.5	205.88	4877.74	30588.6	61.55	444.25
T075 W16	Week 16	Non-anemic	Extensive	Mild	60799.7	4051.83	930.61	1865.16	26002.9	119631	33.81	85.14	30.55	4.57	10305.1	19.47	4.05	1.42	47.82	0.35	6.08	48.18	14.46	18.33	36.89	18.74	16.16	140.92	0.57	731.05	45503.4	4329.08	10724.1	79684.2	1430.54	2554.48	7375.97	26.07	436.59
T095 W16	Week 16	Non-anemic	Limited	Mild	71519.7	12036.1	949.63	2113.87	31966	110301	29.34	103.54	26.72	2.67	12924.7	19.47	9.96	0.1	61.63	0.01	7.6	54.07	1.72	12.56	33.8	18.74	70.4	158.27	24.42	1233.25	70889.6	4329.08	10251.6	66105.4	729.19	1664.19	8859.85	26.07	425.1
B057 W16	Week 16	Anemic	Extensive	Mod-sev	196456	14906.9	1708.47	5863.7	30986.3	170075	61.54	169.53	37.56	10.51	21609.9	45.5	15.02	3.76	86.69	2.24	26.98	118.71	40.66	52.61	55	58.18	178.16	312.74	49.95	3828.79	88412	8307.46	17346.2	124465	1474.18	2019.33	26755.7	56.42	336.77
B084 W16	Week 16	Anemic	Limited	Mod-sev	74865.1	10027.7	1318.22	2219.58	30893.8	109213	42.04	65.1	23.08	5.41	7198.44	4.15	14.76	0.12	39.68	0.07	13.29	66.76	24.51	34.11	35.79	14.86	115.41	199.76	1.66	1335.93	92380.7	3377.68	17007.2	109396	640.76	2668.93	14031.1	33.77	274.95
B085 W16	Week 16	Anemic	Limited	Mod-sev	86267.1	10001.5	1151.6	14857.7	182523	214726	63.41	229.26	39.91	12.95	10874	31.51	8.49	3.33	164.19	0.07	18.64	96.37	38.09	28.41	71.02	64.47	100.17	299.02	20.58	4677.7	107601	36463.3	20004.9	74359.5	1274.46	4325.64	11838.7	99.56	471.87
B087 W16	Week 16	Non-anemic	Extensive	Mod-sev	86533.1	8466.89	996.06	5439.89	19477.2	142850	38.63	148.76	19.03	5.82	26042.2	17.19	12.4	1.59	66.18	0.7	8.4	84.16	22.94	18.9	27.13	25.76	99.99	244.26	33.8	1365.38	88334.7	7793.37	7837.3	66419.8	1134.67	3143.49	10791.4	31.12	589.92
B095 W16	Week 16	Anemic	Extensive	Mod-sev	55443	5749.62	1099.48	1401.4	22588.3	44057.4	26.01	85.22	26.34	3.31	10667.8	37.02	6.53	1.59	56.42	1.72	15.83	47.74	30.47	19.96	29.84	5.43	9.32	206.54	17.83	1536.55	96319	2242.87	15053.4	150060	837.04	2945.12	11666.2	21	516.53
B106 W16	Week 16	Anemic	Extensive	Mod-sev	124895	10008.3	1476.49	12945.6	39854.3	160969	54.64	142.94	41.8	7.28	8545.86	12.36	6.53	2.38	66.18	0.01	12.41	78.22	20.4	18.9	40.53	25.76	43.53	244.26	71.89	5830.88	138095	37815.3	16160.4	111233	2063.45	4058.11	25782.3	85.27	469.32
B107 W16	Week 16	Anemic	Limited	Mod-sev	80710.5	8152.91	1191.22	2392.51	23471.1	113236	26.78	71.25	24.59	1.43	16265.4	18.72	3.73	0.49	6.29	0.45	7.12	47.72	2.98	22.97	29.34	26.62	4.57	114.93	2.61	748.16	78152.7	2850.14	9963	118200	1203.92	2942.66	8138	28.29	966.58
B111 W16	Week 16	Anemic	Extensive	Mod-sev	112145	7066.2	953.34	1755.05	13858.3	110787	38.16	44.1	24.59	2.13	9812.33	77.82	5.49	0.66	32	0.26	11.79	59.12	10.98	22.97	28.13	20.26	0.52	195.04	23.81	1964.94	92843.7	7022.8	14188.2	217205	999.33	4464.79	14124	36.73	1476.26
B112 W16	Week 16	Anemic	Extensive	Mod-sev	55072.5	6078.37	1120.97	3351.63	22568.4	106380	38.16	77.56	37.85	3.51	12889.6	43.72	6.68	2.59	55.86	0.01	13.02	87.13	15.84	25.23	36.54	41.27	14.79	181.85	23.81	1257	138207	4226.32	18753.1	161517	1390.58	3168.51	12123.4	40.84	1368.73
B143 W16	Week 16	Anemic	Limited	Mod-sev	94603.7	16859.7	720.25	2010.87	110242	107346	33.47	109.35	21.83	2.46	15354.5	41.18	6.51	0.68	71.1	0.11	10.77	47.95	16.57	12.05	36.85	29.22	53.29	144.51	26.73	881.91	131549	9199.84	5027.71	115192	701.3	3596.22	14427.7	41.07	733.19
B172 W16	Week 16	Anemic	Extensive	Mod-sev	236507	45098.1	3049.66	5077.64	182523	139030	63.75	159.06	45.06	6.9	13028.7	54.54	8.82	2.76	37.32	0.01	12.76	80	28.47	18.49	60.81	34.31	83.5	193.9	107.93	3831.9	114238	12616.1	11037	527953	2263.35	7294.46	45451.1	73.85	708.1
B190 W16	Week 16	Anemic	Extensive	Mod-sev	125743	10634.9	628.6	2182.09	531068	151069	35.45	114.39	27.55	3.47	10021.8	20.68	4.57	0.14	57.7	0.23	16.06	100.46	3.64	13.76	22.54	1.04	7.83	151.59	0.57	2310.84	152274	9174.38	16950.6	43802.3	1721.69	5769.41	18868.3	24.73	603.56
K049 W16	Week 16	Anemic	Extensive	Mod-sev	94580.4	9753.98	739.47	3517.05	14196	128828	26.66	84.05	15.27	0.97	14492.4	20.68	5.4	0.12	32.41	0.01	13.62	44.24	4.8	25.42	28.22	15.71	32.96	151.59	41.26	720.92	146741	3730.8	6639.16	118373	930.89	2631.57	6140.21	33.25	707.36
T066 W16	Week 16	Anemic	Limited	Mod-sev	148077	16521.1	773.4	4189.37	32609.9	128920	54.13	53.41	24.12	2.21	22133.5	30.88	8.29	0.5	45.31	0.01	14.45	71.25	2.48	44.99	44.7	27.29	29.64	112.39	24.77	1892.03	14269.3	3389.81	14528.5	156884	777.56	3643.92	12991.5	32.31	679.01
T105 W16	Week 16	Anemic	Extensive	Mod-sev	73060.8	12558.4	1751.04	3761.35	40876.9	119814	38.22	126.47	38	4.57	10362.8	24.76	6.11	2.63	75.14	0.67	6.08	71.66	28.51	29.18	46.05	23.72	60.02	241.34	18.25	5196.18	49538.2	6024.79	17052.8	118169	282.28	4680.64	19097.8	61.55	382.99
T115 W16	Week 16	Anemic	Limited	Mod-sev	207367	48997.2	1296.76	5725.26	30135.8	99064.6	71.89	130.68	52.28	10.87	10942	78.24	5.82	3.81	94.99	3.2	33	106.65	47.66	45.71	55.08	46.18	145.26	265.37	129.9	4236.18	84272	3085.78	12483.9	129975	1225.01	3625.78	26584.3	72.67	767.2
T117 W16	Week 16	Non-anemic	Limited	Mod-sev	146170	16795.5	1803.73	3046.22	41972.7	124306	57.42	165.97	59.18	6.42	13262.7	19.47	9.16	4.58	114.45	0.35	19.86	65.8	38.28	36.94	75.8	16.26	105.97	257.39	86.65	3257.8	110663	5644.44	18062.4	103655	1373.3	5711.85	29109.7	45.52	520.89
B001 W16	Week 16	Non-anemic	Extensive	Mild	133893	10171.3	895.35	1640.1	26947.5	141454	61.54	98.17	35.2	12.14	25559.6	52.66	12.38	2.45	65.86	1.95	21.84	96.37	24.51	28.41	49.58	34.66	142.92	271.28	6.2	2155.27	59491.5	6045.34	20025.3	66485.3	988.63	2838.97	8614.66	51.26	469.18
B088 W16	Week 16	Non-anemic	Extensive	Mild	109412	15457.5	1590.62	9298.64	21353.2	153815	57.76	168.52	35.2	9.69	26654.3	34.6	12.38	3.04	91.88	0.01	20.27	99.22	24.51	40.77	63.05	51.72	78.87	305.89	92.94	4421.62	170971	6284.19	11164.7	125825	2039.37	3366.76	15170.8	75.16	391.84
B116 W16	Week 16	Anemic	Extensive	Mild	104800	11111	1421.32	3380.02	19556	76554	50.04	115.29	27.99	6.29	13709.2	90.44	5.47	0.81	65.86	0.07	15.17	66.76	24.51	23.74	44.11	45.09	45.57	199.76	18.49	2469.72	113240	5167.63	9504.17	53691.3	731.9	3903.99	12914.1	37.31	368.13
B164 W16	Week 16	Non-anemic	Limited	Mild	89240.7	8762.29	1118.32	6403.14	22746.6	145272	46.72	144.88	36.76	3.82	18297.6	24.9	8.68	2.95	85.45	1.06	17.41	60.11	36.65	30.18	37.88	10.32	11.07	318.25	42.52	1867.99	168037	4849.91	11315.1	124746	1463.32	2798.69	9791.89	46.64	564.95
B175 W16	Week 16	Non-anemic	Extensive	Mild	55963.5	9006.26	963.02	5108.08	22153.2	174192	60.49	179.96	46.74	11.07	11610.2	21.27	11.28	2.57	101.3	1.06	21.05	81.2	62.04	36.06	48.4	51.41	171.73	303.58	222.45	4267.17	207245	5560.12	22029.5	187342	1210.87	4321.67	16976	43.78	870.04
B181 W16	Week 16	Non-anemic	Limited	Mild	109634	12036.4	1175.15	3503.17	29911.9	93375.3	34.5	116.86	24.55	4.33	11970.4	31.33	12.4	1.59	39.89	0.01	12.41	60.11	20.4	15.66	29.84	39.05	60.27	198.93	33.8	1867.99	128078	8957.42	14571.8	111909	892.37	3179.76	16561.5	33.1	639.18
B192 W16	Week 16	Anemic	NR	Mild	106558	8669.34	686.45	4725.43	17435.1	116627	49.06	153.86	37.85	6.82	18677.3	18.72	4.75	1.63	81.4	0.01	10.52	78.79	22.8	18.44	47.23	32.92	150.84	234.3	56.71	1997.53	81684.8	17921.7	10456.1	88403.2	1139.66	4197.13	6606.8	68.17	1126.93
B205 W16	Week 16	Non-anemic	Limited	Mild	107091	8073.03	1865.52	2607.34	31796.8	123026	52.62	68.13	37.85	6.17	16419.2	32.66	7.61	4.45	66.17	1.01	14.22	98.2	5.81	27.48	42.5	39.19	64.97	234.3	36.65	1964.94	91599.9	3964.5	13853.5	68530.4	1861.52	4523.6	13362.9	36.73	1050.11
B206 W16	Week 16	Non-anemic	Limited	Mild	127643	10517.8	270.07	3134.72	8330.05	58682.3	43.66	88.82	27.97	4.51	29375.2	26.24	6.68	0.12	55.86	0.07	10.52	81.57	18.2	20.71	32.95	32.92	279.12	208.17	13.87	1221.9	80959	6798.29	8263.85	86460.1	1451.57	4025.88	19076.8	50.83	1190.78
K030 W16	Week 16	Non-anemic	Extensive	Mild	67380.6	10834.5	1082.96	4265.72	17837.9	108739	47.89	135.4	39.42	4.36	21531.9	35.11	8.36	2.44	85.48	0.32	18.06	69.39	31.98	26.01	48.99	36.82	75.52	273.37	53.59	2930.7	79081	5534.82	21626.2	138578	2919.25	3126.85	9193.55	50.58	612.95
K032 W16	Week 16	Non-anemic	Extensive	Mild	140748	11380.3	822.02	4256.26	34366.4	136070	47.89	140.29	30.77	4.36	17556.8	41.18	6.98	1.6	71.1	0.11	18.87	66.73	18.99	20.64	52.96	18.58	109.12	193.9	50.38	3514.12	107198	11876.8	13306.9	123502	1024.78	2987.19	17270.6	60.89	914.39
K034 W16	Week 16	Anemic	Limited	Mild	185154	15631.5	667.11	6197.49	23270.2	149135	56.74	165.05	36.56	5	20590.8	61.72	10.16	0.68	66.3	0.53	22.73	64.06	14.13	9.89	63.4	49.05	77.12	218.44	40.81	2329.08	78842.2	10493.5	11989.7	35041.1	1276.3	4322.43	9937.18	69.24	582.96
K036 W16	Week 16	Non-anemic	Limited	Mild	171403	12767.2	732.23	2584.42	20133.5	57945.6	45.97	67.44	42.46	4.09	14176.5	125.42	10.04	1.46	84.39	0.01	22.03	88.85	22.72	22.55	47.39	27.29	154.04	196.63	63.21	2348.18	84055.1	7344.25	8555.82	79851.3	1801.4	2505.46	10131	28.52	811.62
K058 W16	Week 16	Non-anemic	Extensive	Mild	77322.3	11315.6	952.51	4971.22	26242.5	77226.9	60.14	123.32	39.21	4.72	18396.6	30.88	10.29	0.14	57.7	0.09	26.16	80.09	27.14	39.48	50.07	38.32	85.64	215.77	61.48	2496.49	138349	4126.25	7268.34	64445.4	1987.75	3315.23	9056.43	34.2	840.13
K063 W16	Week 16	Anemic	Extensive	Mild	86232.7	16623.4	906.64	8711.45	62790.4	163300	60.14	184.94	45.69	5.36	18620.2	47.02	10.53	1.92	75.63	0.23	19.13	134.85	22.72	29.68	63.31	64.71	183.22	272.68	62.34	2496.49	32904.5	10304.7	5709.33	121831	1007.11	3444.19	8804.76	70.13	764.18
T050 W16	Week 16	Anemic	Limited	Mild	149630	10316.6	970.03	5836.76	34108.8	135065	63.66	115.99	48.77	4.57	22255.2	34.2	5.82	3.42	40.77	0.96	19.86	83.34	41.45	49.4	55.08	18.74	0.52	320.29	35.53	2970.7	76265.9	5342.23	16102.2	115845	2461.05	4706.6	16431	46.69	751.75
T061 W16	Week 16	Non-anemic	Limited	Mild	85931.3	7692.16	1048.99	3487.94	11401.3	103544	33.81	141.28	30.55	1.67	12983.5	24.76	13.35	1.83	68.42	0.51	32.26	54.07	33.46	77.82	36.89	13.77	128.64	175.33	45.73	1920.93	99816.4	9111.04	8317.76	91098.9	1563.04	1958.17	10456.2	52.47	898.85
T076 W16	Week 16	Non-anemic	Extensive	Mild	88165.5	5603.46	833.79	2605.73	13803.1	92043.7	33.81	65.13	26.72	1.67	13101.4	19.47	10.23	0.56	47.82	0.96	35.91	54.07	31.82	100.49	36.89	13.77	90.45	175.33	50.6	1127.26	66893.1	4586.2	16566.2	85152.9	942.74	3082.55	7785.2	47.85	674.62
B055 W16	Week 16	Anemic	Extensive	Mod-sev	105312	10811	1118.84	4857.75	21824.2	142878	53.93	126.89	27.99	7.16	21252	31.51	6.41	1.83	76.29	0.07	21.84	102.04	32.82	30.71	46.86	23.34	0.52	228.8	22.69	535.16	116603	11880.3	13886.6	114448	811.42	3358.44	15953.8	52.98	490.76
B063 W16	Week 16	Non-anemic	Extensive	Mild	94006.3	11111	1446.63	6146.59	22876.9	134648	55.85	165.5	30.42	6.29	28540.5	42.94	13.71	0.81	76.29	0.6	15.17	84.81	48.18	35.23	49.58	23.34	48.59	228.8	15.71	1564.62	126919	8567.76	12219.9	127181	1560.42	3303.89	16242.2	41.7	447.71
B093 W16	Week 16	Anemic	Extensive	Mild	322444	87196.1	1354.22	2709.47	55200.5	153086	106.14	159.48	69.29	12.95	21455.6	82.05	10.75	3.33	138.43	0.99	24.84	150.86	48.18	104.85	74.98	64.47	0.52	400.11	88.44	8373.83	77573.6	20253.7	12832.9	174588	1073.46	14040	57658.5	106.25	331.57
B102 W16	Week 16	Anemic	Limited	Mild	171067	12404.5	1651.42	3623.87	19680.5	140662	38.63	123.6	22.73	2.26	22182.7	21.27	8.38	1.17	49.85	0.01	15.83	66.2	27.98	19.96	35.22	14.57	80.2	214.13	47.88	1054.39	108508	4607.71	15625.3	80590.6	1572.49	2874.94	16586.2	33.1	447.66
B104 W16	Week 16	Non-anemic	Limited	Mild	111792	6863.54	753.41	2777.17	8060.22	145363	34.5	123.6	26.34	4.33	24802.7	17.19	5.23	2.19	53.14	0.01	12.41	53.96	17.84	15.66	27.13	18.49	0.52	168.2	0.57	1745.22	168037	15759.9	17134.8	114421	871.11	764.71	5641.86	54.19	440.37
B110 W16	Week 16	Anemic	Extensive	Mild	50728.8	9081.65	1312.22	2546.54	11969.9	112910	17.05	104.36	15.22	4.33	10461.9	34.25	5.23	0.72	39.89	0.01	5.97	60.11	20.4	16.75	24.39	10.32	0.52	152.65	12.97	1620.68	143014	6305.9	14407.1	132137	1497.7	2812.62	1912.38	33.1	493.08
B129 W16	Week 16	Non-anemic	Extensive	Mild	69485	12364	1194.22	1707.22	16981.9	112078	41.84	103.66	27.97	6.17	14209.6	48.67	6.21	0.66	26.52	0.83	9.87	41.97	15.84	16.16	29.34	41.27	1.01	135.21	18.12	632.64	130693	2708.68	4348.26	92716	1763.28	4339.1	16371.8	40.84	1318
B135 W16	Week 16	Anemic	Limited	Mod-sev	86789.1	8700.07	866.55	1867.96	35407.4	139758	52.62	89.63	34.6	4.51	13315.1	26.24	5.24	0.66	81.4	0.36	11.79	64.77	18.2	11.57	35.35	32.92	126.09	148.62	45.23	1600.29	99519.6	5811.89	17228.7	110121	972.16	3037.44	12302.6	46.87	1139.72
B180 W16	Week 16	Anemic	Extensive	Mod-sev	165202	12958.2	1605.03	2877.16	37042.8	120733	43.66	87.19	34.6	3.17	11285.4	48.67	5.24	0.66	42.74	0.64	16.53	75.99	8.45	26.35	34.15	15.97	16.46	175.24	50.97	3930.35	121016	4161.18	17522.8	151860	1115.34	3333.66	13601.7	28.29	1545.64
B188 W16	Week 16	Non-anemic	Extensive	Mild	114708	5163.86	1042.75	4646.83	19544	156475	31.63	60.37	27.83	3.41	19613.5	20.5	4.08	1.94	68.7	0.32	14.62	85.29	21.38	29.22	43.64	34.31	0.52	181.59	53.59	2192.33	112073	5321	12479.1	96313.1	1247.55	1765.14	9112.12	42.98	884.13
B204 W16	Week 16	Anemic	Limited	Mild	59197.8	6660.14	972.26	1535.72	37000.5	110385	42.53	131.5	36.56	2.78	18691	24.62	5.31	1.77	44.59	0.11	14.62	61.39	17.78	13.12	39.58	29.22	1.98	125.86	26.73	1339.42	111271	3246.28	11676.5	111813	1477.65	3440.89	8032.71	31.37	808.58
K039 W16	Week 16	Anemic	Extensive	Mild	106561	8269.61	935.52	2458.8	18333	151061	38.92	156.08	30.77	3.1	17421.9	35.11	8.13	0.25	66.3	0.11	16.38	42.53	23.76	20.64	31.3	23.99	4.98	132.09	16.07	1558.9	130979	5534.82	26969.4	218833	175.88	3497.36	7809.45	41.07	1020.48
K059 W16	Week 16	Anemic	Limited	Mild	163322	10989.9	1674.66	2392.8	39700.2	137907	64.1	121.07	34.27	4.09	17120.8	47.02	9.3	0.83	45.31	0.01	24.81	94.67	18.29	40.86	47.39	38.32	6.13	228.47	73.54	1735.55	56497.6	3406.25	39091.1	195718	1101.98	4239.24	6066.76	32.31	745.23
K061 W16	Week 16	Anemic	Extensive	Mod-sev	156326	22406.7	1217.13	4607.77	41170.6	139961	68.03	163.56	39.21	5.04	17605.9	60.47	13.42	2.08	115.58	0.49	28.79	83.01	24.93	50.46	55.39	43.7	101.98	278.97	70.96	1814.11	99160.4	9326.93	11424.5	123036	867.84	3443.04	14933.6	62.56	1021.32
K065 W16	Week 16	Anemic	Extensive	Mild	124510	10658.8	743.09	4073.46	38633.6	85503.1	56.14	108.86	47.29	5.36	13772.6	53.98	14.12	1.46	66.75	0.01	16.06	94.67	11.6	26.84	47.39	15.71	82.37	241.14	1.36	10887.2	31150.4	7665.36	7500.5	98498.1	1651.87	2255.73	8686.24	42.71	754.7
T088 W16	Week 16	Anemic	Extensive	Mod-sev	65025.4	11428.6	954.89	4822.99	22434.3	96807.3	42.56	105.61	38	4.57	13824.4	38.54	8.61	3.03	75.14	0.67	31.5	48.18	14.46	36.94	46.05	13.77	55.78	208.73	38.14	1732.26	102264	2003.99	19963.7	126455	1543.03	2201.58	8924.72	50.17	651.52
T100 W16	Week 16	Non-anemic	Extensive	Mod-sev	117425	6535.95	751.87	3553.49	27999	138955	59.51	154.11	52.28	5.5	19150.8	54.29	12.07	4.58	108	2.93	37.32	100.83	36.69	51.84	49.07	63.69	26.39	343.41	78	2104.8	91268.6	4515.06	10072	79168.6	2137.54	2339.37	12042.8	61.55	705.45
T106 W16	Week 16	Anemic	Limited	Mod-sev	113862	7839.72	1352.48	3706.33	37229.2	142820	59.51	171.39	38	7.32	24266.4	29.64	9.96	2.24	101.51	0.67	24.31	71.66	26.84	31.8	55.08	23.72	53.65	366.31	60.04	3498.78	84721.3	9981.08	14294.2	123207	851.14	4597.84	14462.6	61.55	771.06
B026 W16	Week 16	Non-anemic	Extensive	Mod-sev	106850	14149	1401.79	5551.67	23852.8	137636	65.27	155.48	35.2	7.16	8104	37.51	6.1	0.12	76.29	0.99	21.84	96.37	31.48	40.77	55	58.18	62.19	278.25	21.28	1739.86	109031	2808.4	18605.8	128255	1566.74	2235.51	10273.5	39.07	316.03
B056 W16	Week 16	Anemic	Extensive	Mod-sev	229979	8051.57	1260.41	5266.19	25070.7	212354	57.76	163.49	27.99	6.29	27150.4	24.64	9.35	2.15	71.08	0.07	27.68	72.89	27.35	23.74	57.7	64.47	87.99	271.28	31.19	3242.72	91680.6	12454.4	8176.78	61769.5	1153.17	4339.65	18586.9	56.42	310.86
B060 W16	Week 16	Anemic	Limited	Mod-sev	89366	9737.01	1275.11	2104.87	26873.3	155079	53.93	150.5	30.42	10.51	32671.5	28.21	13.45	0.12	99.66	0.99	31.72	90.63	48.18	53.66	38.58	64.47	142.92	299.02	44.13	1951.15	176865	18598.9	20488.9	139247	1517.72	3724.6	14163.7	48.66	739.52
B076 W16	Week 16	Anemic	Limited	Mod-sev	71828.5	7747.39	1043.25	2180.15	22419.7	90880.1	34.5	108.2	29.87	4.33	23181	24.9	8.08	1.17	49.85	0.7	13.31	60.11	20.4	17.83	32.54	25.76	16.29	198.93	5.05	723	125191	2493.36	18139.3	112645	447.05	2868.48	8883.94	27.13	567.23
B078 W16	Week 16	Non-anemic	Extensive	Mod-sev	64213.3	6736.13	1687.58	3707.84	11625.8	135368	34.5	139.06	26.34	2.26	9738.5	42.21	10.72	5.59	26.36	0.01	14.18	60.11	25.47	36.06	28.49	6.33	0.52	183.62	16.63	1099.87	152846	2737.87	44683.6	315165	689.34	4789.94	12491.7	26.12	514.2
B083 W16	Week 16	Non-anemic	Extensive	Mod-sev	77350.1	9423.65	1283.92	3609.41	32529.3	110207	48.72	110.13	29.87	3.31	18651.7	24.9	11.28	0.21	53.14	0.08	8.4	60.11	22.94	28.18	37.88	25.76	70.26	136.96	24.83	2187.78	112747	4222.98	15148.3	129737	1569.8	724.72	13306.8	41.86	493.08
B092 W16	Week 16	Non-anemic	Extensive	Mod-sev	93896.4	10476.2	1032.03	2663.71	40780.4	147565	41.84	112.07	34.6	6.49	12648.8	8.56	3.2	0.32	42.74	0.01	7.83	98.2	15.84	13.87	30.54	22.39	34.52	181.85	30.93	1221.9	112705	10735.4	10267.6	89822.3	496.18	2718.08	12840	66.27	1596.02
B125 W16	Week 16	Anemic	Limited	Mod-sev	123468	9168.94	2066.64	2355.09	57487.4	130940	52.62	124.02	41.06	3.84	25955.3	41.12	8.52	2.27	96.4	0.64	11.79	75.99	20.52	24.1	42.5	32.92	101.17	208.17	22.38	2350.94	111393	14856.6	28203.6	390264	1167.89	5471.23	31365.1	68.17	856.85
T116 W16	Week 16	Anemic	NR	Mod-sev	99851.1	9984.31	744.52	2450.01	10218.5	134746	30.64	111.22	27.97	3.51	25138.7	8.56	7.61	0.32	45.39	0.26	13.02	53.44	2.98	16.16	30.54	22.39	76.05	195.04	11.04	1221.9	103308	7827.08	18159.7	124234	1002.97	3056.72	6419.91	38.79	1152.49
B139 W16	Week 16	Non-anemic	Extensive	Mod-sev	46632.8	7393.79	877.18	292.35	31166.9	111902	35.29	130.52	18.76	8.48	13471.8	80.99	12.78	2.76	51.84	2.66	43.04	137.61	35.45	14.19	34.09	23.99	67.56	206.18	39.23	2464.62	75906.6	4012.97	13749.2	115671	1169.77	3648.46	9150.41	43.94	843.82
B145 W16	Week 16	Non-anemic	Extensive	Mod-sev	69561.2	8202.94	438.79	1435.63	20472.3	81147.2	35.29	76.65	24.85	2.46	13293.8	46.78	5.55	1.06	32.45	0.53	18.06	58.71	21.38	16.34	36.85	39.3	17.23	138.3	23.65	842.31	110761	3364.15	5933.78	67230.5	635.82	1647.52	3583.39	30.39	673.01
K025 W16	Week 16	Anemic	Limited	Mod-sev	70923.9	12749.7	701.01	1052.16	24277.3	85563	31.63	110.31	15.64	3.1	19915.1	35.11	15.33	0.68	42.17	0.11	16.38	53.34	6.59	33.51	31.3	23.99	118.76	119.63	39.23	1339.42	106883	17371.4	14991.2	141678	1004.75	3142.35	8924.6	52.46	662.99
K044 W16	Week 16	Anemic	Extensive	Mod-sev	107246	8197.29	877.96	2655.75	19205.2	119853	39.71	105.57	27.55	0.97	15286.4	93.56	6.47	0.14	57.7	0.01	12.77	65.32	10.47	36.7	33.79	21.59	31.3	151.59	0.57	4009.13	93825	3618.09	20493.1	179223	1186.94	2993.59	7627.34	19.04	745.23
T051 W16	Week 16	Anemic	Limited	Mod-sev	113912	6884.04	1863.41	4253.2	42226.6	111764	48.03	123.32	32.61	2.84	22047.8	30.88	9.05	1.15	35.69	0.01	11.01	88.85	20.51	33.9	40.64	24.46	27.97	190.24	22.88	1248.34	106256	9755.96	14338.2	126320	624.77	4184.91	18958.1	47.43	963.99
T099 W16	Week 16	Non-anemic	Limited	Mod-sev	163031	6946.2	1263.04	2821.39	35628.7	141913	39.71	72.57	30.93	2.21	11567	5.31	5.13	0.12	57.7	0.49	9.15	59.36	14.95	33.9	39.28	15.71	0.52	228.47	29.44	2160.32	77623.1	16511	15338.3	158344	1592.64	1785.32	8852.26	47.43	882.95
T109 W16	Week 16	Anemic	Extensive	Mod-sev	91867.9	10523.1	1124.9	1657.52	19935.9	119592	38.22	97.37	30.55	3.63	12107.5	46.68	7.51	1.42	54.77	0.96	19.86	71.66	31.82	23.85	27.57	18.74	10.54	192.14	133.88	1920.93	104622	6024.79	17167.4	90856.8	1270.05	2649.86	9238.62	38.42	513.22
T042 W16	Week 16	Anemic	Extensive	Mild	85682.4	10944.2	1082.47	2482.58	18279.6	121750	38.22	126.47	30.55	1.67	13575.7	29.64	8.89	1.83	68.42	0.35	15.95	59.94	18.13	31.8	36.89	13.77	40.45	225.12	0.57	1732.26	95121.4	7609.42	12109.7	115211	1754.2	3791.18	10102	57.03	513.22
COT1	Control	Healthy	Healthy	Healthy	121675	7954.32	844.29	2420.96	13085.7	123639	42.04	120.11	30.42	7.16	19693.5	16.12	4.17	2.15	60.64	0.01	15.17	72.89	38.09	46.2	31.56	6.33	0.52	214.37	31.19	1739.86	81117.6	9742.32	8304.74	155578	864.62	3182.56	7476.33	24.78	383.92
COT2	Control	Healthy	Healthy	Healthy	113505	6795.31	544.51	2468.88	14525.2	93262.1	37.91	153.48	23.08	6.29	21683.1	24.64	11.3	0.81	55.41	0.38	24.11	78.9	35.48	31.85	38.58	6.33	103.21	228.8	68.32	2235.18	90847.4	7326.42	11979.2	89338.9	1367.74	2836.69	7131.21	44.32	450.38
COT3	Control	Healthy	Healthy	Healthy	82329	8521.79	572.14	5672.23	100703	138180	54.64	142.94	36.76	6.31	32423.8	17.19	13.49	4.21	98.15	0.01	5.97	78.22	27.98	26.17	43.17	35.84	76.89	318.25	59.47	3243.55	112229	7887.38	8192.1	102037	778.84	3975.49	9055.92	54.19	514.2
COT4	Control	Healthy	Healthy	Healthy	71828.5	13555.7	1853.74	4792.51	46427.1	163119	42.7	168.23	41.8	7.28	13128.2	47.04	11.56	2.19	79.06	0.51	18.91	84.16	32.95	17.83	43.17	45.32	51.92	288.86	65.71	2726.11	112747	10666.9	9262.12	94939.8	1340.77	3047.23	10465.4	46.64	594.43
COT5	Control	Healthy	Healthy	Healthy	47966.4	9595.88	695	2389.09	12642	101777	49.06	97.01	24.59	0.97	17041.7	8.56	7.15	0.12	50.65	0.26	10.52	50.59	18.2	9.26	31.75	22.39	40.99	121.71	1.22	1833.68	107596	11761.1	12285.2	99770.1	1330.41	2955.03	7355.51	54.74	1107.75
COT6	Control	Healthy	Healthy	Healthy	91717.9	11172.4	870.46	1877.19	9501.84	90721.7	38.16	107.01	31.31	4.85	14091.4	14.2	7.38	0.12	34.71	0.26	14.22	59.12	20.52	16.16	30.54	20.26	26.37	114.93	38.79	1700.93	87447.9	17067.5	3711.23	118029	2034.7	3452.92	8798.68	57.65	1165.26
COT7	Control	Healthy	Healthy	Healthy	79640	11119.7	615.89	2110.89	21701.9	114238	49.67	141.27	35.12	3.73	17962.9	56.99	12.57	4.01	71.1	1.14	22.73	93.19	26.12	27.08	42.29	46.64	160.7	255.1	43.99	2054.28	81158.6	16666.4	13708	104804	1050.19	2677.7	8384.88	52.46	939.62
COT8	Control	Healthy	Healthy	Healthy	64108.5	9094.4	802.73	2566.29	20503.7	105063	47.89	112.21	42.25	8.16	15891.2	61.72	6.98	3.39	80.69	1.55	19.67	98.45	14.13	34.59	63.4	34.31	54.87	156.9	36.08	1702.6	93246.7	9441.66	8841.68	66912	590.92	2496.53	11014.7	65.54	683.03
COT9	Control	Healthy	Healthy	Healthy	179974	8178.69	840.79	2276.36	22318	96462.8	43.9	133.49	30.93	3.78	17380.4	66.59	7.52	1.46	63.75	0.49	23.44	100.46	24.93	42.24	54.06	32.85	62.68	203.02	26.65	1969.37	115865	19618.7	8713.44	121316	299.17	2980.25	11169.6	60.67	792.64
COT10	Control	Healthy	Healthy	Healthy	80435.6	11423.1	487.58	1597.36	7840.48	101831	33.29	73.6	27.55	2.84	11991.7	30.88	4.29	0.12	75.63	0.23	19.13	53.35	11.6	19.65	33.79	27.29	52.81	99.17	6.55	1163.89	76973.7	8661.38	9420.25	64498.3	898.33	2616.53	5785.13	34.2	523.72
COT11	Control	Healthy	Healthy	Healthy	68417.8	8254	1459.62	3320.43	25211.3	90985	51.11	100.45	48.77	35.8	16684.9	59.73	10.49	4.96	289.06	2.66	46	80.43	28.51	49.4	49.07	68.7	70.4	351.06	111.72	1920.93	56454.3	8708.48	15247.8	93429.2	1520.6	3061.63	8343.72	68.25	651.52
COT12	Control	Healthy	Healthy	Healthy	64763	7448.17	1334.32	2068.87	11729.7	111607	33.81	122.27	38	1.67	21874.6	34.2	9.16	2.24	61.63	0.67	19.86	71.66	25.14	39.47	36.89	28.71	51.49	192.14	38.14	2013.42	98469.1	16476	8538.75	86279.5	1551.78	3366.96	14085.9	63.79	451.91

## Sheet: Magipix QFT 27-plex
ID	Time point	Blood Hb status	Lung involvement	Clinical TB score	IL-1b	IL-1ra	IL-2	IL-4	IL-5	IL-6	IL-7	IL-8	IL-9	IL-10	IL-12(p70)	IL-13	IL-15	IL-17A	Eotaxin	FGF	G-CSF	IFN-g	IP-10	MCP-1	MIP-1a	PDGF-bb	MIP-1b	RANTES	TNF-a	VEGF
B038 W0	Week 0	Non-anemic	Limited	Mild	3.35	126.83	1.53	2.51	0.2	8.1	45.55	282.82	591.5	2.6	47.17	0.93	1.73	30.04	108.1	72.5	47.04	66.97	857.91	2.1	3.68	3175.56	207.93	4835.91	26.4	336.63
B084 W0	Week 0	Anemic	Limited	Mod-sev	616.01	920.4	15.54	10.65	3.51	2314.29	8.45	13425.4	909.78	29.54	35.88	2.3	4.54	325.54	81.3	37.12	280.77	288.74	12703	295.83	203.53	2357.19	7375.17	3344.48	496.18	174.53
B085 W0	Week 0	Anemic	Limited	Mod-sev	2031.13	4335.41	51.12	18.87	3.51	5054.02	14.25	35477.4	233.82	51.62	57.02	3.75	245.55	457.47	188.3	56.5	854.5	505.93	13294.1	2184.14	1188.92	4487.75	13612.1	2461.75	1043.94	359.33
B086 W0	Week 0	Anemic	Extensive	Mild	360.9	528.4	1.05	6.7	0.78	854.99	2.8	4964.32	152.78	29.85	29.51	0.17	0.93	309.56	106.48	47.5	154.23	220.67	9549.64	164.23	307.48	2681.8	15354.6	8520.98	226.95	129.01
B087 W0	Week 0	Non-anemic	Extensive	Mod-sev	762.39	4214.91	193.35	14.23	2.59	1588.39	9.56	10344.4	211.34	16.37	21.62	3.45	135.27	507.25	147.48	86.85	196.65	602.76	115724	1310.88	319.19	4473.89	8018.5	3415.12	564.38	41.75
B095 W0	Week 0	Anemic	Extensive	Mod-sev	439.34	1766.19	28.15	9.49	1.73	2256.48	14.13	31410.9	203.21	36.61	74.21	2.7	114.73	365.58	118	108.63	261.09	253.39	13278.4	978.36	767.89	1862.8	79274.9	6329.15	444	315.42
B098 W0	Week 0	Non-anemic	Extensive	Mild	869.41	4977.48	91.61	15.65	0.65	3706.37	26.21	33539.6	205.15	54.29	67.05	4.8	53.76	508.67	159.66	74.59	306.69	539.41	68097.4	726.29	131.07	3593.57	6696.29	16874.3	511.65	399.55
B106 W0	Week 0	Anemic	Extensive	Mod-sev	812.95	2162.01	29.31	15.66	1.73	17443.6	7.36	68901.4	196.24	96.99	47.53	3.3	141.46	430.84	238.57	127.77	707.11	546.94	11403.5	665.27	2347.12	2555.22	79274.9	3374.1	1030.47	197.63
B107 W0	Week 0	Anemic	Limited	Mod-sev	464.62	1153.3	1.05	6.98	0.83	1329.8	4.67	16780	148.26	16.61	12.76	2.9	94.32	275.29	71.51	50.66	223.66	226.85	14276.1	819.64	138.83	1662.91	2909.36	3497.83	334.44	81.85
B108 W0	Week 0	Anemic	Extensive	Mod-sev	269.31	2194.86	8.99	10.51	5.84	1013.73	26.21	13895.3	143.21	35.63	17.7	2.75	78.62	412.1	125.41	97.49	240.54	297.51	6747.2	865.01	263.16	4407.76	2282.58	4255.85	556.85	60.48
B109 W0	Week 0	Anemic	NR	Mod-sev	1483.17	2913.77	13.39	14.86	3.48	6086.42	13.83	25839.2	206.03	76.07	42.11	2.28	105.77	549.82	201.42	91.62	355.44	468.11	2818.19	801.13	1702.2	4067.85	12743.5	2492.64	681.24	164.02
B111 W0	Week 0	Anemic	Extensive	Mod-sev	679.82	1398.26	22.32	12.04	7.83	3480.32	14.95	39722.4	199.52	31.2	24.26	3.3	196.66	380.06	109.15	64.07	276.97	364.56	6704.55	1500.35	751.31	1403.81	79274.9	3847.43	267.46	62.8
B112 W0	Week 0	Anemic	Limited	Mod-sev	23.57	1006.35	1.05	4.47	0.83	55.13	2.8	218.65	84.67	12.73	21.61	0.73	0.93	106.7	36.54	22.01	127.89	111.88	1820.76	7.52	6.77	828.17	515.67	3891.52	117.16	136.05
B122 W0	Week 0	Non-anemic	Limited	Mild	316.62	3287.42	281.25	11.97	1.73	8381.73	9.95	58171	166.32	39.34	53.9	8.44	211.55	281.3	100.2	117.78	332.78	711.76	10577.9	2306.72	702.63	3842.01	5547.94	2586.46	366.09	327.67
B128 W0	Week 0	Non-anemic	Extensive	Mod-sev	617.54	2351.47	10.39	16.05	1.62	9833.34	12.77	30682.5	190.56	70.8	38.78	1.8	167.17	551.24	209.39	108.95	613.18	612.46	10853.2	1198.2	1697.43	3979.33	4015.93	1741.13	2216.52	139.27
B142 W0	Week 0	Anemic	Extensive	Mild	1753.81	3545.7	27.07	19.51	3.82	12284.5	25.79	46930.7	241.96	60.71	60.8	3.5	284.43	716.94	345.78	167.19	1219.24	592.35	4740.55	3955.57	1678.83	4455.94	5965.17	6416.23	1503.12	305.24
B143 W0	Week 0	Anemic	Limited	Mod-sev	1200.45	1086.77	93.25	9.22	3.31	4966.76	4.67	14979.5	191.74	31.2	16.9	1.21	188.26	298.13	122.38	76.45	336.24	352.85	22945.8	1437.8	350.92	1017.58	11644.8	2847.13	649.57	31.33
B157 W0	Week 0	Anemic	Limited	Mild	190.2	3411.27	546.98	15.99	2.84	1495.82	15.36	26458.4	297.66	56.04	94.4	3.5	215.63	592.52	180.81	151.43	201.97	855.43	33691.6	1526.23	426.51	4435.83	2967.86	1991.66	607.4	413.93
B167 W0	Week 0	Non-anemic	Extensive	Mild	118.43	706.74	54.26	9.17	5.52	511.17	5.35	15165.8	148.85	20.36	22.64	16.46	163.83	233.78	95.44	45.71	194.89	226.31	9118.92	1191.65	214.3	419.48	1824.28	1915.37	245.39	175.42
B172 W0	Week 0	Anemic	Extensive	Mod-sev	1927.16	4476.45	48.29	18.93	1.62	11364.1	9.56	30571.9	233.89	101.78	34.8	3.68	133.17	546.98	224.31	82.01	788	583.32	15518.1	1193.09	2003.65	4304.94	8349.47	1839.98	2781.96	145.84
B193 W0	Week 0	Non-anemic	NR	Mod-sev	750.24	3849.58	84.64	13.17	1.18	3069	75.72	19034.7	193.02	56.04	25.29	9.73	132.63	471.77	176.94	216.72	345.15	612.34	13728.1	1283.84	451.73	3454.87	3125.43	4096.39	843.12	66.82
B196 W0	Week 0	Non-anemic	Limited	Mild	128.94	3940.62	131.94	14.67	5.6	2262.08	41.29	28309	231.5	141.71	81.89	14.63	282.84	577.02	314.95	6.83	248.66	582.34	23411.9	1740.4	190.7	4828.91	3810.59	1609.47	376.23	196.21
B201 W0	Week 0	Anemic	NR	Mod-sev	714.92	1015.35	8.04	11.46	3.51	5897.07	8.45	16096.2	183.12	60.22	32.91	3.27	49.45	355.65	207.03	69.2	727.12	310.51	12711.5	565.61	915.17	2715.39	11564.1	3316.21	1116.23	185.14
K038 W0	Week 0	Non-anemic	Extensive	Mild	1557.26	4955.22	132.15	24.56	5.6	23402.8	241.22	126676	260.98	288.26	123.47	80.43	170.82	694.67	294.1	237.79	775.25	896.51	20237.7	2434.62	1635.65	2786.73	8323.17	2393.99	879.78	235.24
T008 W0	Week 0	Anemic	Limited	Mod-sev	66.93	1106.29	0.5	11.48	1.18	163.09	19.9	8330.25	160.26	49.07	49.3	9.5	140.13	334.17	128.78	82.31	179.2	299.41	33975.6	1848.52	48.32	3210.49	1743.81	3442.81	424.44	201.75
T048 W0	Week 0	Non-anemic	NR	Mild	333.17	3202.11	41.6	13.17	1.18	702.05	7.38	18782.4	209.64	30.66	22.5	2.76	54.29	577.76	124.59	18.76	224.5	393.9	36552.3	767.76	748.12	3295.18	4712.43	1729.55	524.82	201.75
T053 W0	Week 0	Anemic	Extensive	Mild	538.57	1099.98	41.19	22.48	1.75	7963.43	12.24	24856.7	230.07	73.21	39.34	3.5	191.11	589.57	214.91	221.87	724.67	597.35	32128.6	1510.78	1704.89	4626.45	5118.68	1885.29	670.26	208.23
T054 W0	Week 0	Non-anemic	Extensive	Mild	228.69	1296.16	19.85	11.33	2.59	1192.82	11.71	12598.8	167.12	25.23	21.62	4.13	86.83	318.15	99.43	86.85	206.85	340.7	47706	977.34	264.86	4934.61	2205.55	3341.81	274.63	58.91
T064 W0	Week 0	Non-anemic	Extensive	Mild	567.29	2930.97	93.06	12.83	1.18	5038.02	7.38	30618	198.25	20.83	24.59	8.08	195.29	508.51	132.93	121.55	285.42	460.87	15122.2	1680.6	697.32	2088.48	4236.6	1299.55	598.72	42.64
T066 W0	Week 0	Anemic	Limited	Mod-sev	1386.73	6113	630.92	16.86	4.71	9079.08	11.64	27816.3	195.83	51.72	42.41	21.06	197.49	457.51	230.68	141.69	507.58	1041.99	107497	1159.14	5088.22	5435.24	14043	1178.85	1880.09	77.07
T075 W0	Week 0	Non-anemic	Extensive	Mild	471.06	2960.42	201.41	12.7	3.48	2677.44	15.93	19939.3	218.41	32.65	36.12	2.28	128.93	450.46	127.36	12.51	247.22	485.39	18100.9	1462.76	245.25	3591.01	6735.81	2233.62	955.1	162.37
T115 W0	Week 0	Anemic	Limited	Mod-sev	47.31	946.6	5.21	19.78	1.62	214.82	11.71	4454.73	493.82	105.57	215.85	0.22	77.64	238.76	263	50.95	287	1007.15	11309.4	927.7	66.61	2823.89	1062.2	2482.99	768.03	261.29
B001 W0	Week 0	Non-anemic	Extensive	Mild	252.85	6790	144.6	17.64	7.23	3254.43	22.87	34706.8	345.89	74.78	109.24	38.5	223.03	598.43	336.41	123.38	305.44	716.35	33484.5	2381.14	535.55	2340.69	4328.9	3736	888.4	87.84
B088 W0	Week 0	Non-anemic	Extensive	Mild	282.59	3152.16	141	10.17	7.83	1905.39	19.8	16789.2	220.41	45.5	44.97	7.02	186.57	372.82	135.38	114.38	261.09	418.64	52960.4	1519.73	578.04	4107.28	79274.9	2817.29	437.38	80.48
B092 W0	Week 0	Non-anemic	Extensive	Mod-sev	74.42	1377.71	20.54	8.84	86.02	266.16	1017.55	15025.2	179.89	474.44	189.51	282.62	89.08	291.13	159.54	3.23	209.11	577.49	18928.6	608.6	81.1	1456.17	2189.19	2351.66	297.03	219.94
B093 W0	Week 0	Anemic	Extensive	Mild	200.56	1072.68	20.75	9.83	1.03	3370.77	12.36	20169.5	432.34	31.22	28.48	21.48	115.88	165.68	107.11	16.76	424.25	288.74	14063.8	1609.78	45.67	131.33	1011.43	4510.57	485.21	131.75
B102 W0	Week 0	Anemic	Limited	Mild	1840.92	3949.68	85.98	17.38	5.09	9004.34	18.02	44758.7	215.76	61.03	30.17	3.22	175.89	474.6	201.42	112.89	459.11	605.19	20129.3	1346.82	1388.94	1487.25	5991.03	6175.16	1698.4	84.23
B104 W0	Week 0	Non-anemic	Limited	Mild	3698.76	6924.98	149.85	28.32	6.57	33559.1	24.18	35877.5	293.69	216.24	38.12	14.05	221.21	639.24	242.49	109.52	858.46	1262.29	13804.5	1434.35	5166.54	3596.13	9310.09	3140.52	2251.21	199.97
B110 W0	Week 0	Anemic	Extensive	Mild	741.58	6010.64	43.7	13.11	5.09	1162.06	15.93	21638.4	242.74	26.72	40.11	4.57	136.53	517.89	144.64	43.14	233.84	406.02	15235.5	1821.68	1275.05	3800.58	29008	7281.3	421.31	175.67
B125 W0	Week 0	Anemic	Limited	Mod-sev	940.33	1994.85	290.81	16.6	6.01	19527	7.36	105114	242.54	33.9	43.69	37.29	209.91	437.51	190.54	121.15	509.25	1109.31	55090.6	1905.19	13750.2	187.96	79274.9	2378.15	608.59	105.97
B129 W0	Week 0	Non-anemic	Extensive	Mild	713.21	3444.74	83.38	16.91	11.83	6131.17	23.16	30226.5	207.8	55.03	88.3	37.46	206.85	583.88	186.2	107.82	406.77	524.72	18071.2	1880.42	689.46	4489.78	9441.79	2867.85	1197.6	439.35
B135 W0	Week 0	Anemic	Limited	Mod-sev	1210.05	2957.83	16.96	19.4	3.48	8604.98	11.71	48692.8	244.07	68.54	62.97	2.75	134.43	561.17	178.04	124.48	444.89	672.86	36152.1	1065.25	1254.89	3299.39	7339.21	2683.39	972.13	312.54
B139 W0	Week 0	Non-anemic	Extensive	Mod-sev	1087.76	7031.69	61.45	13.09	4.71	9134.79	4.67	25828.1	215.09	76.98	69.14	23.4	192.47	404.22	229.09	113.81	525.92	515.21	34237.7	1495.29	324.36	5823.25	6082.05	2085.24	1293.97	385.08
B145 W0	Week 0	Non-anemic	Extensive	Mod-sev	1891.57	6009.31	177.73	16.04	1.73	16555.7	9.95	39777.9	305.76	57.97	35.99	4.64	156.29	386.7	142.23	45.07	1004.17	585.84	23343.1	1275.75	1492.91	4058.4	11966.3	2354.24	1128.57	90.77
B192 W0	Week 0	Anemic	NR	Mild	381.2	1045.43	1.05	6.12	3.31	794.06	18.2	11520.8	158.11	12.73	39.85	3.69	0.93	276.49	66.72	15.05	194.73	166.25	4916.77	315.51	1044.32	2739.81	6236.31	10871.5	253.98	165.89
B204 W0	Week 0	Anemic	Limited	Mild	509.19	3477.14	131.9	9.42	34.83	2502.76	60.42	25763.2	169.71	75.81	43.36	8.86	168.6	323.39	214.43	29.5	380.88	403.8	12870.7	1091.7	493.44	3419.33	3835.65	2236.02	687.8	38.6
B205 W0	Week 0	Non-anemic	Limited	Mild	412.99	1331.93	1.05	9.97	0.83	4775.57	1.81	19941	166.73	17.26	27.55	0.73	74.66	304.15	170.81	73.09	303.25	325.37	13282.5	748.48	2600.56	2230.88	79274.9	2145.01	631.54	101.81
B206 W0	Week 0	Non-anemic	Limited	Mild	452.4	3495.66	100.03	16.41	1.18	7404.24	7.38	40433.5	236.25	63.82	28.08	13.94	274.85	591.04	196.12	119.71	733.12	582.34	14941.6	2981.45	1623	1797.59	6720.24	4819.76	849.59	72.05
K025 W0	Week 0	Anemic	Limited	Mod-sev	821.38	4660.37	210.92	16.86	4.03	18381.8	6.48	54288.5	500.3	37.97	31.46	20.39	201.24	426.6	184	152.06	460.64	822.81	94728.3	1879.62	2280.98	2878.95	79274.9	2228.37	565.91	66.86
K032 W0	Week 0	Non-anemic	Extensive	Mild	837.79	6537.84	411.47	21.44	3.82	11980.7	22.87	48761.9	280.98	124.01	68.03	47.47	226.31	733.29	231.53	117.86	456.78	1120.85	35825.1	1801.2	1267.86	4593.82	6792.94	3328.61	1816.75	148.64
K034 W0	Week 0	Anemic	Limited	Mild	615.61	2563.79	9.55	8.55	7.23	814.6	19.9	6676	250.99	50.61	102.55	5.45	38.31	310.83	174.99	267.13	200.08	251.2	6721.73	337.35	85.79	2029.39	1661.45	2559.17	448.49	673.7
K036 W0	Week 0	Non-anemic	Limited	Mild	552.74	6296.58	184.9	21.52	8.76	5041.98	25.79	31326.2	617.99	53.71	71.66	11.84	250.73	638.35	283.57	188.67	403.96	799.57	35942.6	2658.59	1908.68	3661	6004.26	4056.41	983.16	170.49
K039 W0	Week 0	Anemic	Extensive	Mild	216.28	1529.17	6.74	12.14	0.65	3970.4	5.15	22123.1	146.75	26.72	38.78	5.02	141.96	375.13	127.36	53.71	230.48	373.46	29951.4	1160.7	280.33	4776.14	2539.46	1813	293.43	216.01
K044 W0	Week 0	Anemic	Extensive	Mod-sev	2976.41	4636.17	218.82	17.17	4.03	88926.2	14.95	20226.6	185.59	85.52	39.85	7.37	239.03	348.7	237.79	85.56	1141.52	686.43	14527.4	2252.03	3172.5	1306.1	39420.9	8283.29	1341.55	159.46
T050 W0	Week 0	Anemic	Limited	Mild	512.17	995.65	41.6	13.5	1.18	941.06	10.65	7445.48	202.52	28.38	40.76	2.01	26.34	556.37	116.12	127.01	211.38	320.61	25297	628.33	263.46	5394.67	4051.27	1802.26	446.3	295.69
T051 W0	Week 0	Anemic	Limited	Mod-sev	327.89	622.1	1.05	7.55	1.73	1567.79	0.77	14684.6	110.37	21.86	42.41	2.5	42.36	195.96	123.25	28.19	202	183.18	18838.5	730.1	33.73	5263.26	1736.04	7726.79	233.72	258.78
T061 W0	Week 0	Non-anemic	Limited	Mild	677.33	1798.48	14.37	14.42	1.75	5004.19	7.38	40043.2	237.2	34.47	57.91	1.5	184.8	579.23	194.22	144.61	321.74	471.09	8891.7	2319.96	1188.86	3097.72	5228.06	2740.08	657.26	105.54
T076 W0	Week 0	Non-anemic	Extensive	Mild	443.5	4104.09	52.42	16.16	1.75	3788.52	19.9	48933.5	339.19	29.9	33.7	9.26	203.21	633.91	152.29	108.44	343.35	483.84	14341	1643.95	262.9	4195.91	3831.08	1884.1	985.31	205.45
T099 W0	Week 0	Non-anemic	Limited	Mod-sev	3721.54	8325.24	63.79	30.25	5.09	63946.4	23.16	65084.3	270.63	175.21	201.83	7.83	236.12	640.66	309.89	167.32	1898.89	1044.52	12779.4	2185.56	3546.94	12596.8	24443.1	2835.3	1161.56	1660.77
T100 W0	Week 0	Non-anemic	Extensive	Mod-sev	352.56	1589.75	91.22	14.82	1.03	5988.28	8.45	28928.2	222.78	65.4	37.37	7.94	185.8	391.5	153.68	100.66	372.13	517.96	22888.3	1406.6	1288.44	2886.34	13612.1	1397.74	694.29	128.3
T106 W0	Week 0	Anemic	Limited	Mod-sev	186.91	870.3	69.61	10.81	0.88	1154.24	9.45	16583.6	155.81	66.27	89.59	4.22	154.16	300.45	149.74	71.65	269.39	310.51	14413.7	1191.65	116.31	5683.68	1689.23	1482.53	478.62	430.86
T109 W0	Week 0	Anemic	Extensive	Mod-sev	2566.45	2908.59	203.16	24.58	3.48	11760.1	1065.28	41912.7	839.3	518.8	252.44	170.7	699.5	889.77	208.51	128.82	1258.17	1798.16	11972.5	4284.08	553.3	7444.41	6070.86	14499.2	1926.23	2199.58
T116 W0	Week 0	Anemic	NR	Mod-sev	1659.39	3256.74	16.42	18.62	5.09	12632.2	18.02	64395.5	14169.8	71.55	59.58	5.46	171.15	596.65	208.51	120.1	748.79	532.07	19344.3	1515.4	1404.91	6257.53	38646.2	2475.66	1431.37	371.78
B038 W4	Week 4	Non-anemic	Limited	Mild	320.83	938.12	63.26	4.21	5.57	1242.14	47.57	8673.6	865.41	7.54	37.62	4.87	1.73	214.66	90.5	91.25	105.34	120.64	8701.72	2291.33	214.35	3889.83	2246.98	3955.51	301.27	174.51
B084 W4	Week 4	Anemic	Limited	Mod-sev	379.82	1599.59	147.65	9.83	0.88	1873.87	12.36	27951.2	1580.47	29.54	27.01	5.17	188.88	302.6	98.65	62.94	267.1	395.47	17875	1849.7	114.47	1996.93	2694.88	1745.85	423.61	152.59
B085 W4	Week 4	Anemic	Limited	Mod-sev	351.84	6665.91	79.59	8.51	1.03	463.71	7.44	36119.4	176.65	12.14	19.75	6.56	132.58	321.96	81.3	3.23	187.74	208	17396.1	1280.9	348.12	1859.37	13612.1	2287.36	234.11	23.12
B086 W4	Week 4	Anemic	Extensive	Mild	312.02	784.85	13.96	11.11	1.73	3076.52	8.23	17829.4	197.88	37.97	37.28	2.5	141	370.41	119.75	58.26	259.32	345.03	12955.7	1592.82	1305.61	3337.66	79274.9	3008.77	384.37	133.23
B087 W4	Week 4	Non-anemic	Extensive	Mod-sev	622.4	9175.68	622.34	16.13	5.09	6452.04	15.93	36260	209.13	26.72	17.7	32.04	210.65	551.24	164.29	129.36	305.05	1317.44	118066	1830.56	1638.07	3936.47	7192.2	2334.24	807.68	72.31
B095 W4	Week 4	Anemic	Extensive	Mod-sev	379.45	2400.66	53.03	7.69	3.31	2044.21	176.62	33511.4	250.74	96.27	119.49	4.07	115.21	446.59	113.59	136.93	269.92	220.67	8523.83	1132.17	322.47	956.41	79274.9	27857.9	381.04	228.37
B098 W4	Week 4	Non-anemic	Extensive	Mild	342.98	8462.5	291.44	15.65	2.59	4418.55	9.56	38572	206.92	17.84	22.93	23.24	215.18	504.41	187.1	49.55	240.54	1169.98	77654.6	2329.3	137	3009.78	6560.54	2325.21	413.78	97.04
B106 W4	Week 4	Anemic	Extensive	Mod-sev	263.76	1194.56	34.88	10.64	4.03	3276.94	11.64	49877.9	174.52	23.84	47.53	3.3	112.79	319.79	167.49	99.17	308.48	305.58	17171.4	698.71	256.21	1801.2	8103.49	2681.77	280.9	105.28
B107 W4	Week 4	Anemic	Limited	Mod-sev	530.72	1757.05	17.79	15.15	3.31	26289.8	4.67	101622	186.82	29.85	20.27	3.1	237.83	389.72	162.49	88.09	489.18	490.81	5919.37	2070.43	764.14	2808.52	79274.9	27857.9	519.86	78.43
B108 W4	Week 4	Anemic	Extensive	Mod-sev	436.71	2438.88	1.73	22.46	5.09	1480.01	9.56	42501.4	157.38	35.63	17.7	10.56	120.77	485.25	233	102.12	323.01	866.06	33922.8	1834.11	461.38	5613.71	4549.26	2205.98	451.41	55.77
B109 W4	Week 4	Anemic	NR	Mod-sev	888.53	3392.45	0.17	15.1	5.09	5096.9	16.98	30461.9	224.6	59.53	75.24	3.45	152.65	495.89	178.04	105.55	326.27	403.52	1042.1	1327.99	909.18	5410.14	4893.71	2647.41	813.34	390.57
B111 W4	Week 4	Anemic	Extensive	Mod-sev	385.17	1405.12	1.05	10.44	1.73	6322.97	9.95	57419.2	171.65	41.39	43.69	2.9	134.58	321	105.59	42.59	462.32	426.3	2080.48	915.12	592.43	2148.59	4035.32	1258.67	357.77	212.95
B112 W4	Week 4	Anemic	Limited	Mod-sev	164.66	2725.49	66.45	9.22	4.71	1592.04	13.31	22198	172.88	3.37	4.68	18.71	138.26	335.45	76.24	32.95	165.37	329.31	3180.53	1234.44	149.35	1969.15	5547.94	1828.57	467.12	46.65
B122 W4	Week 4	Non-anemic	Limited	Mild	295.41	2357.01	339.45	14.89	4.71	11137.8	8.23	133640	220.41	51.72	47.53	35.11	205.79	376.44	122.38	109.79	505.91	753.16	38410	2369.53	1447.79	2296.45	79274.9	2113.86	506.69	134.64
B128 W4	Week 4	Non-anemic	Extensive	Mod-sev	1916.91	6976.48	26.44	18.62	5.84	10285.9	30.24	43919.9	206.92	77.58	34.8	4.57	205.33	569.69	199.64	114.56	495.26	588.19	15963.2	1970.13	2801.43	3129.01	9275.22	3179.03	1283.04	107.51
B142 W4	Week 4	Anemic	Extensive	Mild	2160.31	3358.17	27.48	17.15	1.75	8022.84	13.81	32546.6	241.01	31.42	25.29	2.01	131.3	515.13	302.82	135.92	707.76	440.36	8793.84	1421.79	1071.56	3747.45	5349.93	6893.59	1316.31	97.55
B143 W4	Week 4	Anemic	Limited	Mod-sev	1231.82	2727.8	426.95	11.31	5.37	7812.64	9.09	20617.1	174.52	57.28	23.6	9.49	230.22	341.47	140.52	79.09	391.18	539.49	36552.1	2287.95	571.05	2125.37	79274.9	27857.9	559.33	56.05
B157 W4	Week 4	Anemic	Limited	Mild	353.79	5771.95	662.48	17.15	1.75	1583.71	19.9	18308.3	231.97	62.26	63.69	3.5	190.69	585.88	204.62	218.19	259.74	857.85	71224.1	1259.44	235.36	4938.22	3538.17	1813.69	603.06	291.88
B167 W4	Week 4	Non-anemic	Extensive	Mild	616.26	4123.68	319.77	14.34	15.1	5420.84	10.43	33238.3	209.89	31.22	27.01	204.8	247.93	338.45	174.99	82.43	517.78	693.88	70941.2	1975.7	2033.35	786.37	8483.89	2109.19	694.29	74.19
B172 W4	Week 4	Anemic	Extensive	Mod-sev	176.01	791.39	7.78	12.79	1.62	2953.13	9.56	37545.9	179.5	50.54	57.56	10.35	196.14	481.7	121.49	64.38	298.5	315.35	12070.1	2898.77	462.07	4860.63	4451.51	5239.73	579.45	274.24
B193 W4	Week 4	Non-anemic	NR	Mod-sev	652.47	7647.07	96.44	16.32	1.18	3741.82	129.21	30052.9	205.37	76.36	36.52	15.33	94.91	588.09	171.09	272.59	402.19	843.32	12314.1	741.55	411.15	3836.42	4512.5	9023.53	702.73	58.14
B196 W4	Week 4	Non-anemic	Limited	Mild	144.34	4828.02	221.61	15.5	15.59	1477.33	31.52	39140.5	307.67	83.44	48.59	198.27	292.39	601.38	269.42	27.33	290.89	1285.31	43748.8	2534.16	788.93	3851.65	6935.25	2214.12	529.17	93.13
B201 W4	Week 4	Anemic	NR	Mod-sev	352.08	995.39	0.52	9.83	1.03	3643.14	12.36	12785	179.42	49.91	34.39	3.75	50.2	326.98	190.19	75.3	532.46	293.11	10105.2	707.66	627.13	3245.56	4152.91	2419.4	616.22	178.95
K038 W4	Week 4	Non-anemic	Extensive	Mild	816.84	2965.23	289.53	18.86	7.23	8791.38	281.66	43120.1	271.45	254.86	124.22	112.88	163.99	743.7	233.36	243.48	421.63	867.53	25658.7	3245.87	1339.08	3214.71	9179.69	4112.87	1084.27	205.45
T008 W4	Week 4	Anemic	Limited	Mod-sev	28.8	1630.05	12.07	7.94	1.75	133.39	39.91	3684.51	92.74	63.82	23.2	4.48	30.43	222.07	182.74	24.05	146.43	386.11	34702.8	597.76	15.45	1543.75	908.65	4295.88	341.06	20.61
T048 W4	Week 4	Non-anemic	NR	Mild	1102.81	2993.26	79.18	12.83	1.18	557.36	7.38	14759.1	186.85	22.34	42.89	5.69	50.13	582.92	130.86	14.91	207.62	465.98	43787.9	528.84	488.88	3215.77	3099.38	1183.39	498.68	229.63
T053 W4	Week 4	Anemic	Extensive	Mild	270.32	1210.27	16.67	15	1.18	2772.77	7.38	22200.3	165.96	50.61	30.88	2.01	156.67	425.56	206.5	229.16	276.27	360.04	11216.1	1288.71	661.03	3232.69	3148.25	1541.06	869	240.86
T054 W4	Week 4	Non-anemic	Extensive	Mild	1745.01	3817.65	94.03	23.14	15.39	16777.5	13.83	77864.4	250.26	55.78	29.51	36.3	268.35	605.17	239.05	138.97	925.48	899.12	65955.9	2601.87	2945.96	5535.13	16488	7150.15	1051.63	119.67
T064 W4	Week 4	Non-anemic	Extensive	Mild	362.49	1976	61.8	10.63	2.84	1559.09	28.67	15918.9	217.24	28.38	32.29	8.79	215.63	506.3	99.81	102.64	237.54	341.69	10699.3	3454.3	318.03	2486.3	4048.12	3180.53	498.68	87.84
T066 W4	Week 4	Anemic	Limited	Mod-sev	1062.84	5863.23	503.32	15.02	1.73	4420.13	4.67	45618.9	168.78	33.9	13.46	31.43	189.53	357.74	203.51	134.26	433.64	783.6	49108.3	1358.75	1689.41	1862.8	2896.7	987.47	523.16	52.02
T075 W4	Week 4	Non-anemic	Extensive	Mild	914.43	4476.45	453.54	20.09	5.09	11870.2	15.93	40609.4	259.12	70.05	63.65	10.97	169.16	494.47	192.49	49.55	537.41	832.91	44858.6	1742.13	745.9	3414.88	15733.6	3644.57	1068.68	286.37
T115 W4	Week 4	Anemic	Limited	Mod-sev	162.16	2107.67	111.13	44.18	3.48	709.35	11.71	13991.2	947.82	263.87	541.63	1.8	240.56	406.42	624.63	77.09	748.79	2313.8	20714.5	1638.71	200	1838.79	2380.2	7773.42	1815.08	317.8
B001 W4	Week 4	Non-anemic	Extensive	Mild	814.75	2467.4	12.49	11.48	1.18	2046.74	13.81	21797.7	408.22	70.86	55.04	0.45	133.52	462.23	301.08	102.64	267.1	409.44	2323.89	943.29	829.27	2483.23	3829.24	1516.13	907.79	105.54
B088 W4	Week 4	Non-anemic	Extensive	Mild	252.04	2063.52	75.71	8.04	12.25	856.18	24.53	15802.8	201.16	28.51	37.92	11.06	113.27	349.3	160.82	91.84	194.73	267.55	24906	999.63	587.61	3083.48	79274.9	2135.76	301.02	73.66
B092 W4	Week 4	Non-anemic	Extensive	Mod-sev	101.43	1786.29	86.65	7.84	63.19	329.95	872.04	4782.04	180.35	445.22	169.01	267.81	26.69	278.94	167.3	3.23	225.53	624.44	19152.2	539.53	92.11	987.01	2842.75	2274.38	341.65	274.31
B093 W4	Week 4	Anemic	Extensive	Mild	577.03	1348.05	37.72	13.55	3.51	5326.81	21.5	28786.8	1988.53	53.34	47.89	7.26	173.86	228.04	176.9	42.91	500.95	495.87	14479.1	1680.13	80.73	320.99	1596.71	1990	592.29	196.69
B102 W4	Week 4	Anemic	Limited	Mild	1869.69	3077.2	1.73	10.84	0.65	4407.78	7.37	424.89	23.58	11.22	0.62	2.75	53.76	63.2	95.3	63.07	188.11	289.85	301.12	70.6	8.76	1386.01	40.15	3113.85	278.39	49.52
B104 W4	Week 4	Non-anemic	Limited	Mild	885.48	3374.16	157.05	25.78	5.09	18077.2	11.71	77864.4	256.46	55.03	43.45	18.68	292.1	629.31	197.86	61.76	496.83	1230.04	44656.4	2312.36	2872.97	4774.81	17736.9	3855.29	688.78	169.01
B110 W4	Week 4	Anemic	Extensive	Mild	710.67	4241.53	265.01	12.46	5.09	1070.77	32.24	16691.2	229.91	30.42	29.51	13.44	169.16	514.34	144.64	55.07	217.01	401.02	13070.1	1882.21	792.09	2888.61	7706.33	7886.98	579.45	177.34
B125 W4	Week 4	Anemic	Limited	Mod-sev	918.16	1862.2	279.4	17.92	2.55	35417.4	4.67	98353.8	186	33.9	35.99	58.78	192.47	412.69	213.16	88.09	559.16	837.01	30091.7	1585.28	5924.86	127.6	79274.9	1381.6	703.61	112.23
B129 W4	Week 4	Non-anemic	Extensive	Mild	360.71	2828.35	101.33	13.59	16.52	1520.2	26.21	38104.4	213.55	34.14	37.45	52.82	224.58	538.47	172.57	88.05	220.38	401.02	26478.5	2297.33	290.09	2105.66	12995.8	2966.48	534.25	130.26
B135 W4	Week 4	Anemic	Limited	Mod-sev	1319.14	3402.9	14.81	16.44	5.09	4695.29	14.88	41114.9	246.72	45.31	54.86	3.22	159.95	556.21	147.48	99.81	270.49	524.72	17264.6	1464.48	892.71	4022.25	6226.14	1998.57	839.79	361.98
B139 W4	Week 4	Non-anemic	Extensive	Mod-sev	265.5	2587.06	16.39	8.46	1.73	2327.24	2.8	19604.8	164.68	28.51	34.7	16.01	129.93	311.37	148.18	61.91	211.05	241.18	10286.2	1235.3	126.86	4702.63	8493.63	3646.92	641.38	147.37
B145 W4	Week 4	Non-anemic	Extensive	Mod-sev	497.74	3301.43	224.56	11.77	6.01	7821.01	21.39	30372.8	331.71	33.9	41.77	10.36	163.78	361.96	106.48	16.28	525.92	449.18	16905.6	1518.89	1166.84	1637.35	29044.2	8278.43	769.04	56.05
B192 W4	Week 4	Anemic	NR	Mild	476.17	1010.95	1.05	8.11	3.31	2194.44	21.39	12910.7	184.77	21.86	40.49	3.3	120.02	328.22	99.29	35.68	211.05	212.41	5496.11	1398.76	1031.47	3512.79	79274.9	2392.89	516.57	194.73
B204 W4	Week 4	Anemic	Limited	Mild	339.63	2443.7	267.39	11.62	26.14	2212.15	58.88	17618.8	200.21	213	151.92	8.4	462.88	376.45	586.9	31.06	400.47	888.94	6275.31	2473.59	451.06	4073.86	5709.51	2373.28	928.71	168.37
B205 W4	Week 4	Non-anemic	Limited	Mild	428.27	812.63	1.05	8.67	0.83	2314.82	1.81	16010.2	198.29	12.09	34.7	0.17	93.29	381.87	135.38	48.3	220.07	269.57	8678.29	1088.51	1462.76	1808.29	79274.9	1620.64	425.8	119.2
B206 W4	Week 4	Non-anemic	Limited	Mild	350.18	1994.67	111.9	19.91	7.23	13183.3	3.93	80334.7	225.32	72.43	37.22	45.23	245.87	552.68	201.8	125.2	748.3	632.26	7177.26	3478.22	1760.13	2020.39	7484.35	4511.52	1043.41	164.09
K025 W4	Week 4	Anemic	Limited	Mod-sev	1432.22	4798.6	431.88	15.59	4.71	19291.2	8.23	65596.9	489.36	48.95	65.33	25.41	270.47	369.2	180.72	202.35	746.2	1179.61	74498.6	2934.09	5927.15	1792.94	79274.9	5329.02	598.74	138.87
K032 W4	Week 4	Non-anemic	Extensive	Mild	1612.95	2999.49	1783.46	26.77	16.84	16015.5	15.36	101092	290.51	59.15	60.8	123.11	345.13	667.97	313.23	110.35	428.68	7226.58	57909.6	2245.26	2528.25	4986.21	7251.87	1639.4	972.4	174.15
K034 W4	Week 4	Anemic	Limited	Mild	656.09	2181.33	47.01	12.66	12.98	1660.05	19.9	18995.6	295.27	61.48	127.23	6.41	177.2	474.71	214.91	187.89	257.89	302.07	10601.9	1189.92	139	3871.24	2902.99	2318.81	711.38	434.66
K036 W4	Week 4	Non-anemic	Limited	Mild	707.67	3114.79	201.1	12.5	8.76	1869.82	19.9	13559.4	344.93	57.59	56.47	11.61	186.49	497.48	236.1	141.16	316.31	602.35	35974.3	2876.25	410.79	2833.4	4528.42	4769	888.4	186.07
K039 W4	Week 4	Anemic	Extensive	Mild	685.61	1675	12.85	11.65	1.62	3734.34	11.71	31947.8	193.65	47.55	50.82	3.45	128.5	413.52	151.25	3.5	230.48	340.7	12404.8	1172.63	219.56	3810.91	2552.31	1757.08	458.94	303.79
K044 W4	Week 4	Anemic	Extensive	Mod-sev	608.34	1551.4	31.62	9.49	1.73	6118.84	11.64	16734.1	154.42	29.85	53.9	2.9	184.88	273.48	98.39	64.07	273.45	327.34	11949.8	1822.59	75.73	3256.4	4362.61	4954.87	440.69	276.01
T050 W4	Week 4	Anemic	Limited	Mild	1277.7	3002.61	63.68	20.56	3.82	13475.2	18.4	32104.2	302.9	41.36	62.24	5.69	142.76	555.63	188.5	179.24	631.27	589.85	19615	1856.25	2380.62	4639.97	10414.9	2821.12	1423.67	256.83
T051 W4	Week 4	Anemic	Limited	Mod-sev	679.69	1569.68	1.05	9.29	1.73	3986.45	2.8	17285.8	174.52	40.7	67.87	2.29	97.89	329.42	138.81	22.01	220.07	257.45	6948.97	1077.99	116.24	3637.37	12875.5	2757.84	389.35	350.8
T061 W4	Week 4	Non-anemic	Limited	Mild	360.07	1814.06	13.32	14.17	5.6	2650.82	13.81	13706.3	241.96	32.18	55.04	3.5	205.7	645.75	167.17	141.16	237.54	419.77	8236.39	3088.72	1526.06	4576.96	6497.63	5704.15	739.49	118.02
T076 W4	Week 4	Non-anemic	Extensive	Mild	599.6	2921.63	81.91	15.5	1.75	4050.16	19.9	42355.3	247.66	31.42	30.88	35.8	236.12	647.23	182.74	171.24	328.96	526.97	26094.7	2367.3	398.85	3985.87	5978.61	2114.9	875.47	103.76
T099 W4	Week 4	Non-anemic	Limited	Mod-sev	1557.77	3533.77	41.23	20.78	1.62	15503.6	9.56	40705.1	214.87	73.06	100.09	2.28	175.89	606.59	236.46	153.06	807.54	631.83	5762.21	1701.7	2926.96	10276.4	16286.6	2206.88	1315.34	633.35
T100 W4	Week 4	Non-anemic	Extensive	Mod-sev	899.83	3341.09	40.84	21.93	10.64	18506.5	12.36	42636.4	267.81	245.76	70.87	55.48	256.91	517.71	264.17	148.67	1645.45	942.11	14335	2361.45	1188.92	5934.25	13612.1	3465.19	2138.13	322.14
T106 W4	Week 4	Anemic	Limited	Mod-sev	220.88	1027.82	154.62	8.51	0.88	1290.31	5.35	10719.9	130.24	27.86	40.36	7.94	120.55	226.61	113.37	62.94	273.95	279.96	28735	1305.42	95.5	4519.72	1424.43	1683.77	439.04	251.54
T109 W4	Week 4	Anemic	Extensive	Mod-sev	653.7	2699.14	509.62	21.7	3.48	20544.7	1669.59	34036.5	1689.93	1191.83	364.87	390.94	987.96	912.63	197.86	91.03	1609.94	2196.8	3588.16	5918.86	1264.93	6311.26	12407.2	12947.8	2832.58	1831.14
T116 W4	Week 4	Anemic	NR	Mod-sev	1299.48	3654.47	26.44	27.13	3.48	38343.3	15.93	62755.6	1924.41	243.52	41.45	6.76	143.62	632.14	307.41	151	2704.4	778.24	4764.08	1087.42	1909	4907.69	7059.98	1559.77	1360.97	180.68
B038 W8	Week 8	Non-anemic	Limited	Mild	320.83	938.12	63.26	4.21	5.57	1242.14	47.57	8673.6	865.41	7.54	37.62	4.87	1.73	214.66	90.5	91.25	105.34	120.64	8701.72	2291.33	214.35	3889.83	2246.98	3955.51	301.27	174.51
B084 W8	Week 8	Anemic	Limited	Mod-sev	183.76	812.56	40.84	9.17	3.51	1316.83	12.36	14491.7	1446.75	22.02	25.55	2.06	62.5	305.47	74.61	71.65	255.64	310.51	13580.4	1142.8	118.97	2295.77	2938.44	2502.38	504.94	52.14
B085 W8	Week 8	Anemic	Limited	Mod-sev	70.58	7274.5	31.08	8.84	1.03	319.17	6.41	24974.6	183.12	6.51	11.25	3.75	150.9	314.07	79.08	3.23	175.73	175.34	21141.8	1329.88	195.8	2077.13	5932.5	1342.25	175.07	22.36
B086 W8	Week 8	Anemic	Extensive	Mild	604.63	2058.94	15.79	11.64	1.73	2928.77	11.64	46660.3	181.9	32.55	19.6	4.07	144.64	346.29	127.6	53.75	315.44	325.37	7525.43	1378.35	1272.42	1681.54	79274.9	4097.69	618.43	86.65
B087 W8	Week 8	Non-anemic	Extensive	Mod-sev	784.26	9867	640.26	20.63	13.04	10111.3	32.24	31531	258.23	52.04	42.78	32.42	223.46	596.65	205.86	137.38	361.89	1135.23	121371	2282.34	2243.44	4460.65	15539.5	5688.02	1341.96	112.37
B095 W8	Week 8	Anemic	Extensive	Mod-sev	1739.44	2989.42	97.18	10.78	3.31	5221.04	101.79	37558.8	235.16	78.4	103.48	7.73	146.45	383.68	164.16	134.26	445.47	403.27	9980.75	1035.82	711.35	1665.24	8223.19	8630.44	770.67	445.32
B098 W8	Week 8	Non-anemic	Extensive	Mild	458.8	8699.55	532.66	15.34	5.84	5054.22	18.02	51435.3	210.45	40.09	59.58	39	235.38	518.6	192.49	65.68	300.14	1943.58	104349	3686.23	300.36	2542.02	9997.49	9239.5	1032.7	68.36
B106 W8	Week 8	Anemic	Extensive	Mod-sev	455.34	1153.3	38.13	9.9	0.83	4031.33	6.48	45151.7	171.65	28.51	20.27	1.66	87.57	322.2	205.93	91.84	299.76	337.18	20370	575.01	530.62	857.65	8786.04	9688.49	331.11	65.51
B107 W8	Week 8	Anemic	Limited	Mod-sev	467.07	1747.91	20.76	15.59	1.73	31738.3	9.09	94317.2	181.08	56.58	34.7	3.69	201.65	418.74	156.62	109.79	671.15	532.03	2346.71	2037.62	809.81	2017.33	437604	27857.9	549.47	145.24
B108 W8	Week 8	Anemic	Extensive	Mod-sev	114.69	3105.78	48.67	11.98	3.48	1053.46	9.56	24078.4	171.54	36.37	24.24	4.13	198.06	406.42	153.12	122.29	247.22	335.64	39647.2	2024.38	101.74	5378.63	2020.97	2345.45	342.31	103.48
B109 W8	Week 8	Anemic	NR	Mod-sev	968.83	4310.8	11.97	19.24	5.09	9579.52	18.02	77864.4	238.76	57.28	38.78	3.9	203.04	593.82	231.26	132.05	473.29	453.27	2949.86	1421.45	1734.32	4157.98	19475.2	1959.05	539.9	148.31
B111 W8	Week 8	Anemic	Extensive	Mod-sev	397.84	1891.92	1.05	11.38	3.31	6164.25	6.48	50145.6	178.62	19.22	32.11	1.66	149.15	355.33	91.11	45.89	380.94	345.03	2030.73	1044.62	479.61	2409.99	6658.8	2603.95	317.75	113.62
B112 W8	Week 8	Anemic	Limited	Mod-sev	310.12	3676.83	364.21	10.44	11.73	5089.36	8.23	61171.1	196.65	12.73	18.93	92.58	152.73	346.89	105.59	61.91	234.41	1021.18	19900.7	1420.84	778.07	2855.42	79274.9	2723.66	611.87	43.98
B122 W8	Week 8	Non-anemic	Limited	Mild	435.24	1551.4	229.89	14.64	6.01	18979.9	8.23	74827.3	206.48	83.38	34.7	21.06	210.73	418.13	139.67	126.67	500.89	626.29	9044.7	2520.34	1916.73	1672.22	79274.9	5675.27	661.04	114.32
B128 W8	Week 8	Non-anemic	Extensive	Mod-sev	768.88	9973.21	22.95	16.6	6.57	6084.4	28.23	42653.4	229.91	52.04	36.12	5.68	207.23	520.02	192.49	78.94	365.11	607.61	20656.9	2243.11	1779.94	4005.33	8873	2926.34	637.87	108.32
B142 W8	Week 8	Anemic	Extensive	Mild	3700.21	10896.7	31.22	24.87	1.75	23987.3	18.4	59050.9	284.79	87.39	50.74	3.99	146.26	719.91	384.5	194.86	1166.77	758.06	5413.62	716.23	3076.75	6369.94	10893.9	11887.3	1896.3	144.11
B143 W8	Week 8	Anemic	Limited	Mod-sev	421.33	2465.04	299.49	9.76	4.71	5928.67	4.67	25029.8	174.93	33.9	32.11	7.73	185.73	352.92	126.74	85.56	284	494.57	66255.3	2120.4	774.01	1903.29	79274.9	9997.88	552.76	42.64
B157 W8	Week 8	Anemic	Limited	Mild	384.85	3545.7	103.42	15	3.82	2723.76	16.89	29518.5	217.24	48.29	49.3	11.84	203.21	672.42	180.81	223.33	348.73	549.68	16289.1	2091.85	793.36	8093.63	4771.11	2487.62	715.71	211.94
B167 W8	Week 8	Non-anemic	Extensive	Mild	286.09	3321.65	273.56	11.87	3.51	2596.46	6.41	39360.1	207.12	16.23	16.89	155.62	209.06	329.84	132.8	60.39	314.58	387.11	64840.8	1722.91	886.27	1156.94	13612.1	2773.89	434.63	40.97
B172 W8	Week 8	Anemic	Extensive	Mod-sev	977.99	3241.1	30.89	18.7	3.48	13326.3	11.71	47095.1	230.8	91.17	46.79	2.75	228.31	583.88	236.46	117.34	987.66	532.07	15782.7	2458.55	2490.9	3319.66	12578.6	3569.87	2066.39	131.08
B193 W8	Week 8	Non-anemic	NR	Mod-sev	1170.63	3943.76	149.33	18.13	3.82	6574.05	13.81	24200.8	241.01	63.04	74.58	11.14	152.35	499.69	213.98	33.51	398.64	567.29	13565.6	1784.79	891.39	3888.67	4800.09	3082.03	875.47	180.56
B196 W8	Week 8	Non-anemic	Limited	Mild	141.65	4135.57	184.46	14.34	5.6	2189.27	39.91	29638	231.5	125.62	69.48	53.95	346.7	594	340.67	39.28	244.96	612.34	23271.4	3432.6	384.47	2631.87	5652.93	3699.8	450.68	86.08
B201 W8	Week 8	Anemic	NR	Mod-sev	1080.56	1881.9	14.03	14.03	3.51	7203.52	14.25	22435.7	192.36	61.95	70.87	3.51	131.45	385.77	216.27	107.8	889.88	414.18	26957.7	1038.26	1049.76	5539.38	13612.1	1576.94	1401.6	442.25
K038 W8	Week 8	Non-anemic	Extensive	Mild	1154.71	3011.95	237.6	23.68	8.76	18425.6	220.74	52558.1	298.61	424.2	171.44	100.43	205.7	665.01	287.09	246.3	755.04	1049.73	11973.9	4232.35	1922	3442.06	7277.15	5895.88	1481.64	265.32
T008 W8	Week 8	Anemic	Limited	Mod-sev	744.76	3972.03	451.03	19.91	27.79	5770.94	37.14	31726.1	273.83	59.15	63.69	231.69	196.96	668.71	264.07	250.52	435.72	1908.9	67184	1911.36	1661.89	2843.79	4486.29	2218.12	879.78	191.6
T048 W8	Week 8	Non-anemic	NR	Mild	276.9	3614.54	146.75	11.65	10.22	620.35	13.81	9887.37	226.27	37.52	40.05	99.1	146.26	592.52	109.67	30.48	215.14	562.26	26714.4	1381.08	637.26	2818.87	3915.93	1767.56	659.43	188.83
T053 W8	Week 8	Anemic	Extensive	Mild	954.4	2224.87	77.5	19.02	0.37	7111.3	10.65	43582.6	236.25	75.57	45.02	12.54	204.04	727.34	203.68	229.16	411.03	612.34	15315.9	2274.71	1745.16	3324.9	6662.93	1875.78	1262.62	207.31
T054 W8	Week 8	Non-anemic	Extensive	Mild	1873.2	3072	115.85	18.78	7.97	11832.6	28.23	41640.6	238.32	71.55	54.86	13.03	197.67	588.85	227.79	124.48	459.11	737.65	39420.6	1749.18	1797.1	3498.97	13941.4	5523.6	1478.98	89.02
T064 W8	Week 8	Non-anemic	Extensive	Mild	312.34	2417.65	241.16	12.33	1.75	4439.65	30.1	26165.4	216.77	23.84	33.7	35.58	230.81	564.48	138.08	99.69	267.1	483.84	9939.15	2733.41	394.49	1853.07	4078.57	2477.6	700.56	97.55
T066 W8	Week 8	Anemic	Limited	Mod-sev	1420.53	7323.44	373.65	11.91	3.31	4245.62	8.23	89089.1	189.69	27.84	21.61	9.84	214.83	363.17	174.12	100.97	346.6	473.83	46615	1714.73	1233.46	5238.4	79274.9	4681.15	670.87	52.02
T075 W8	Week 8	Non-anemic	Extensive	Mild	338.05	3288.02	452.8	14.23	1.62	4097.3	11.71	29305.9	309.67	29.68	37.45	9.52	112.45	433.42	153.12	21.87	348.98	684.89	32317	1605.59	520.54	4646.57	9185.78	2734.99	647.3	141.73
T115 W8	Week 8	Anemic	Limited	Mod-sev	221.15	1444.71	74.82	18	2.59	1113.94	11.71	19205.3	374.69	64.78	104.97	2.28	118.16	468.21	277.36	65.68	374.76	1072.49	25528.7	1748.3	355.21	2104.45	3947.62	4968.65	858.68	312.54
B001 W8	Week 8	Non-anemic	Extensive	Mild	358.2	3170.92	160.12	13.92	5.6	1400.53	19.9	21052.2	421.69	76.36	80.42	13.47	238.56	549.74	318.4	104.59	265.26	587.35	31285	2580.18	276.5	2042.39	3935.61	3936.56	585.69	89.6
B088 W8	Week 8	Non-anemic	Extensive	Mild	641.51	4246.56	65.68	11.77	13.8	5218.85	83.02	35564.5	389.59	149.57	72.94	30.76	262.68	410.27	155.78	115.52	394.59	490.81	7753.73	2331.19	2814.01	2661.25	79274.9	6871.31	1004.33	136.05
B092 W8	Week 8	Non-anemic	Extensive	Mod-sev	51.09	794.95	83.69	10.65	37.59	683.67	356.51	12465	140.95	110.87	65.46	94.72	138.76	292.56	180.72	3.23	227.87	724.39	29020.9	2446	134.13	1313.59	3297.62	3591.62	317.14	163.1
B093 W8	Week 8	Anemic	Extensive	Mild	702.91	1629.11	45.97	14.74	10.64	6325.55	55.8	21749.9	452.4	128.58	169.83	9.08	203.06	308.33	506.75	65.46	747.2	597.13	18201.8	1611.61	250.46	219.12	3637.42	3782.83	2365.5	116.29
B102 W8	Week 8	Anemic	Limited	Mild	551.46	3397.67	136.81	11.08	5.09	3112.97	9.56	42577.3	163.58	10.49	22.28	5.9	189.96	305.31	134.13	86.85	184.68	396.02	25957.3	1694.68	196.61	607.64	1769.99	5296.5	583.22	29.43
B104 W8	Week 8	Non-anemic	Limited	Mild	484.66	2963.01	172.41	18.23	3.48	9369.45	9.56	42387.9	243.18	46.06	16.4	11.8	188.02	529.95	171.65	57.1	430.63	813.92	39512.3	1703.45	1956.05	3149.14	12496.2	3969.81	507.88	66.78
B110 W8	Week 8	Anemic	Extensive	Mild	428.34	2805.07	204.04	10.92	3.48	1076.03	7.37	21661.2	200.73	17.84	30.83	11.18	112.01	449.04	146.53	31.81	213.63	345.76	20673.1	1254.5	1118.94	2521.13	14557	2103.34	458.94	93.83
B125 W8	Week 8	Anemic	Limited	Mod-sev	962.75	1887.35	221.03	15.15	4.71	42593.7	2.8	59668.5	196.24	26.5	52.62	91.16	175.49	377.65	205.12	103.94	628.5	633.61	14468	1832.52	6556.42	154.88	79274.9	1377.69	2144.22	99.74
B129 W8	Week 8	Non-anemic	Extensive	Mild	667.6	2805.07	117.71	14.31	11.83	5035.34	13.83	48902.9	236.1	36.37	46.79	59.32	225.33	566.85	178.04	98.65	463.84	465.64	14498.6	2660.82	734.32	3814.78	11615.1	2677.63	679.35	210.94
B135 W8	Week 8	Anemic	Limited	Mod-sev	688.26	4108.62	12.68	13.83	5.09	3190.56	13.83	20328.5	230.35	25.23	29.51	2.75	73.17	476.02	155.93	73.34	233.84	391.02	53592.1	1006.39	722.43	3760.59	12646.7	20195.8	355.47	87.42
B139 W8	Week 8	Non-anemic	Extensive	Mod-sev	117.24	5687.85	66.45	10.64	0.83	2706.32	2.8	47096.8	219.59	43.44	31.46	19.38	158.94	371.61	155.78	84.92	212.86	360.66	29312.2	1524.78	146.08	4921.72	12123.1	2670.75	693.79	101.12
B145 W8	Week 8	Non-anemic	Extensive	Mod-sev	341.06	2892.03	291.04	11.51	6.01	4874.88	10.8	31911.5	300.42	30.53	27.55	8.09	134.11	363.17	93.85	0.85	336.24	341.11	27059.4	1634.67	589.7	1549.63	79274.9	24416.2	437.38	45.31
B192 W8	Week 8	Anemic	NR	Mild	416.32	1473.7	7.65	8.18	4.03	3408.74	13.31	32181.4	173.29	24.51	41.13	2.9	149.15	359.55	112.7	17.49	273.45	239.14	2026.6	1743	914.56	3972.58	79274.9	3288.51	430.77	255.05
B204 W8	Week 8	Anemic	Limited	Mild	230.69	1913.74	287.82	10.65	26.75	2025.98	43.23	18718.7	178.04	58.5	53.96	19.09	251.72	361.39	227.27	29.5	280.77	422.46	17338.7	2040.25	375.92	3948.16	13612.1	2945.81	557.42	85
B205 W8	Week 8	Non-anemic	Limited	Mild	400.44	754.73	1.05	8.67	0.83	1715.01	0.77	13853.6	164.27	11.45	22.27	1.21	38.32	307.76	135.38	52.22	225.46	199.95	8946.1	577.85	1280.43	1056.46	79274.9	2351.92	417.53	70.94
B206 W8	Week 8	Non-anemic	Limited	Mild	369.87	1754.84	243.39	23.6	16.84	8008.93	3.93	96160.4	267.17	72.43	50.74	140.49	265.64	716.94	228.78	149.74	907.4	896.51	12281.5	3292.75	2400.3	2249.55	7089.11	3913.3	1153.05	105.54
K025 W8	Week 8	Anemic	Limited	Mod-sev	6693.65	3056.78	840.97	34.04	43.98	580848	16.58	284787	763.08	159.96	83.1	390.89	314.4	601.48	332.97	276.05	2391.89	2194.61	7204.18	2151.5	21766.5	2275.37	79274.9	6717.53	6937.02	279.02
K032 W8	Week 8	Non-anemic	Extensive	Mild	3151.45	7954.98	4041.84	34.25	37.61	29090.8	13.81	729860	343.5	82.65	92.92	401.91	351.38	714.71	330.43	153.12	978.82	14017.6	60958.9	2681.8	3548.01	5895.77	9670.23	1939.55	1612.64	214.73
K034 W8	Week 8	Anemic	Limited	Mild	393.8	1200.83	18.33	12.16	9.5	918.39	10.65	15516.1	292.41	34.47	68.03	3.99	170.4	392.62	186.58	130.6	181.11	294.09	5661.8	1504.98	106.14	5271.61	1779.08	2073.24	533.52	421.82
K036 W8	Week 8	Non-anemic	Limited	Mild	550.13	6839.26	181.4	16.24	7.23	3612.47	16.89	24904.4	326.29	65.39	65.13	11.14	244.25	650.19	232.45	183.98	292.71	750.72	26185.8	2592.21	778.28	5235.74	3722.9	2090.53	871.16	204.53
K039 W8	Week 8	Anemic	Extensive	Mild	520.62	1567.55	1.73	12.79	0.65	6554.38	9.56	29177.1	193.65	40.09	33.47	4.13	170.75	446.2	142.74	25.3	257.22	335.64	3776.4	1881.32	325.38	3511.73	5352.36	4283.45	504.12	198.28
K044 W8	Week 8	Anemic	Extensive	Mod-sev	494.75	1738.77	71.07	8.39	3.31	3847.26	9.95	29799.8	162.22	29.85	47.53	6.66	177.63	218.8	97.48	58.26	216.47	309.55	17504	2026.95	30.53	4513.31	1868.56	3781.93	354.44	334.59
T050 W8	Week 8	Anemic	Limited	Mild	2572.46	5804.19	87.16	29.91	3.82	30248.3	13.81	64762	263.84	104.84	60.8	20.39	232.04	736.26	272.97	284.71	1064.77	930.21	14414.5	1831.13	4208.87	4728.02	6925.17	2626.14	3424.59	236.18
T051 W8	Week 8	Anemic	Limited	Mod-sev	397.84	1363.96	1.05	10.37	0.83	3053.79	8.23	11107.8	188.46	50.33	62.16	2.9	156.73	357.14	132.8	0.85	262.86	241.18	3238.32	1626.31	78.08	5266.37	15291	2545.85	477.02	360.11
T061 W8	Week 8	Non-anemic	Limited	Mild	310.24	1137.83	31.01	17.8	1.18	4154.66	3.93	32517.5	253.85	31.42	53.6	4.97	300.32	727.34	176.94	179.24	296.35	514.32	25993	3478.22	662.29	5601.59	6449.17	2903.21	463.78	250.25
T076 W8	Week 8	Non-anemic	Extensive	Mild	616.51	2937.2	53.88	17.72	3.82	6843.16	16.89	68996.4	218.19	37.52	26.68	32.2	231.22	611.73	178.88	171.24	437.48	450.62	11566.4	2936.98	561.26	3499.8	5774.53	2915.5	789.18	112.67
T099 W8	Week 8	Non-anemic	Limited	Mod-sev	260.83	1173.04	40.28	11.33	1.62	2372	13.83	17926	179.94	17.84	41.45	7.19	111.57	451.17	108.57	59.11	232.16	305.17	4439.59	2580.38	350.55	4487.13	11635.1	4813.11	334.79	183.18
T100 W8	Week 8	Non-anemic	Extensive	Mod-sev	292.78	2001.86	97.85	12.35	5.52	3251.8	10.43	21297.5	188.21	49.91	35.88	22.13	217.47	412.3	146.78	97.32	419.94	418.32	20215.6	2111.82	1067.49	4530.38	13612.1	1663.56	718.07	130.03
T106 W8	Week 8	Anemic	Limited	Mod-sev	222.28	1481.37	330.77	10.16	1.03	740.19	10.43	12219.9	173.41	44.78	35.88	26.02	144.31	261.74	113.37	56.5	251.04	314.84	41816.3	1777.36	97.57	4827.68	1869.07	2298.57	430.22	242.48
T109 W8	Week 8	Anemic	Extensive	Mod-sev	783.68	2508.37	793.19	23.67	1.62	23806.6	2154.08	44704.8	2318.85	1723.84	387.79	507.75	1133.24	929.78	239.91	122.29	1625.6	3007.62	7895.58	4904.9	2188.77	5329.4	26062.1	7666.68	3934.83	1607.97
T116 W8	Week 8	Anemic	NR	Mod-sev	1398.9	3251.52	8.47	16.68	3.48	8193.96	19.05	39644.2	687.83	76.07	69.77	4.13	196.52	531.37	236.46	89.84	607.02	430.93	5093.22	2527.91	583.54	4876.76	8908.62	4236.48	805.79	415.78
B038 W16	Week 16	Non-anemic	Limited	Mild	182.78	1050.75	30.18	6.4	3.75	1952.19	31.24	10508.5	911.05	9.22	26.71	4.87	1.73	295.04	100.65	124.81	80.25	139.53	6280.75	2403.49	363.1	2964.35	5743.88	2822.76	123.81	91.38
B084 W16	Week 16	Anemic	Limited	Mod-sev	116.19	980.41	94.64	8.84	1.03	1929.61	21.5	17919.5	1079.22	21.19	18.32	11.12	139.32	302.6	83.5	62.94	239.49	340.61	14955	2016.06	115.41	1806.19	2340.86	3293.25	467.64	65.14
B085 W16	Week 16	Anemic	Limited	Mod-sev	331.93	1449.31	82.55	10.08	5.52	2138.46	6.41	23224.4	186.82	25.35	12.65	5.63	207.07	311.92	118.54	5.08	305.61	271.13	16680.7	2345.42	290.93	1578.57	11795.3	2783.59	386.04	79.16
B086 W16	Week 16	Anemic	Extensive	Mild	480.36	1416.55	92.47	10.37	3.31	3205.46	6.48	91995.1	204.03	22.52	30.16	9.84	159.82	375.84	118.88	53.75	284	405.2	40700.1	1921.68	559.88	2030.62	79274.9	2923.39	311.06	72.3
B087 W16	Week 16	Non-anemic	Extensive	Mod-sev	752.46	3277.59	652.98	19.78	7.97	9124.06	13.83	77864.4	256.46	35.63	33.47	42.47	246.83	642.79	202.31	156.15	385.99	1142.19	116904	4038.82	1736.75	6054.83	26921.9	11909.6	549.31	93.03
B095 W16	Week 16	Anemic	Extensive	Mod-sev	620.58	2249.13	192.26	10.98	8.41	3629.03	18.2	33933.7	272.48	53.8	83.1	29.76	215.64	387.31	145.64	137.46	304.99	410.96	14845.4	1584.44	715.98	2052.4	11064.7	8922.4	516.57	283.54
B098 W16	Week 16	Non-anemic	Extensive	Mild	543.51	6279.13	399.41	13.91	6.57	5267.71	9.56	60415	223.72	29.68	44.12	36.3	233.15	485.96	165.21	28.6	334.39	832.91	30663.7	3518.39	137.27	3208.38	5526.19	7295.42	539.9	184.86
B106 W16	Week 16	Anemic	Extensive	Mod-sev	475.55	1510.27	126.33	10.84	0.78	5821.07	4.67	19291.8	195.83	46.19	42.41	7.37	188.26	346.29	230.68	89.35	356.93	430.12	12854.9	1733.03	389.71	4522.2	29514.8	3814.74	440.69	161.6
B107 W16	Week 16	Anemic	Limited	Mod-sev	404.93	1679.36	25.44	11.04	7.24	7926.43	9.95	46677.7	191.74	40.7	26.89	11.23	215.23	334.24	116.24	73.77	423.49	360.66	3623.11	2801.22	589.91	1903.29	25515	27857.9	463.82	83.22
B108 W16	Week 16	Anemic	Extensive	Mod-sev	498.23	1982.12	22.95	9.85	1.62	2050.05	9.56	17478.3	156.49	21.54	20.31	2.28	124.65	386.51	155	78.32	290.29	235.74	18638.5	1663.16	284.4	4329.95	2959.34	9008.65	368.64	54.21
B109 W16	Week 16	Anemic	NR	Mod-sev	896.77	4766.61	13.39	15.81	6.57	10521	13.83	39528.4	221.51	73.06	49.47	3.22	169.56	525.7	240.77	111.21	628.54	617.31	2557.13	1395.69	1460.71	4113.53	5618.31	1588.79	764.25	240.69
B111 W16	Week 16	Anemic	Extensive	Mod-sev	467.93	1798.19	1.05	15.21	3.31	41161.9	8.23	35816.4	229.43	70.61	30.81	4.07	194.99	388.51	169.98	65.48	940.03	520.83	1893.73	1787.81	1201.26	4494.07	79274.9	5001.37	467.12	218.08
B112 W16	Week 16	Anemic	Limited	Mod-sev	530.85	2994.06	563.38	12.82	16.77	8885.48	8.23	50145.6	216.32	23.18	16.9	103.31	153.62	407.85	131.93	59.73	318.92	1229.07	16974.2	1698.91	2682.42	3375.76	79274.9	2498.24	844.22	47.99
B122 W16	Week 16	Non-anemic	Limited	Mild	571.07	1786.76	342.12	14.89	3.31	19061.2	2.8	60993	226.15	57.28	35.99	25.41	152.73	439.32	142.23	106.3	499.22	548.79	9464.94	2264.28	2094.09	1772.91	79274.9	5322.72	639.74	105.28
B128 W16	Week 16	Non-anemic	Extensive	Mod-sev	1182.4	7478.25	10.39	17.92	7.97	6154.31	15.93	45964	206.92	49.05	34.13	4.13	185.3	549.82	203.2	49.55	429.05	510	15803.9	2394.59	2329.57	4550.79	10782	13574.7	635.99	105.9
B142 W16	Week 16	Anemic	Extensive	Mild	1232.58	5476.06	25.4	17.96	3.82	15829.9	22.87	33426.3	245.76	52.94	39.34	3.99	222.21	531.32	345.78	144.61	897.41	524.45	18105.4	2650.52	1705.06	3877.78	10502.6	7094.1	1305.57	118.92
B143 W16	Week 16	Anemic	Limited	Mod-sev	15.54	261.56	1.05	5.23	0.83	21.86	4.67	1301.54	62.93	26.5	28.85	2.5	0.93	79.33	96.58	32.95	97.05	105.18	1114.37	7.52	5.53	2064.53	347.73	2541.35	127.61	117.8
B157 W16	Week 16	Anemic	Limited	Mild	276.9	7264.79	1170.93	16.98	3.82	3865.94	19.9	34182.6	268.6	48.29	42.18	8.32	277.25	564.48	255.12	176.85	299.99	1350.57	83494	2482.31	953.87	3288.82	6752.41	3559.51	733.01	118.02
B167 W16	Week 16	Non-anemic	Extensive	Mild	148.23	2380.34	109.32	10	3.51	1608.44	8.45	37335.2	174.8	19.53	22.64	36.25	176.48	294.71	123.67	60.39	310.1	275.55	37103.9	1975.7	707.25	1029.3	6481.95	2397.84	292.56	33.9
B172 W16	Week 16	Anemic	Extensive	Mod-sev	705.05	1761.99	26.44	11.49	0.65	5057.77	8.47	65782.7	228.14	50.54	34.8	1.8	221.21	512.92	177.13	73.34	495.26	485.39	12579.4	2534.69	943.35	4249.74	4867.61	4387.34	700.1	219.4
B193 W16	Week 16	Non-anemic	NR	Mod-sev	291.69	1882.59	148.47	13.34	1.18	1341.76	112.13	20263.9	209.64	73.21	42.18	16.02	129.08	599.17	127.73	231.32	332.56	777.62	11388.9	2250.16	310.61	3357.85	4365.6	8622.81	739.49	107.32
B196 W16	Week 16	Non-anemic	Limited	Mild	174.28	4406.74	136.44	12.41	5.6	1141.21	28.67	26658.5	220.09	84.23	49.3	17.86	250.73	516.6	198.02	6.83	222.63	532.03	26136.6	2304.2	213.75	2413.88	4235.77	4997.99	393.78	72.05
B201 W16	Week 16	Anemic	NR	Mod-sev	17.53	398.3	0.52	5.79	0.88	18.67	1.94	732.51	52.15	22.85	9.17	0.8	4.54	79.67	157.59	38.59	141.52	161.06	2096.57	36.59	6.88	2595.6	266.93	2390.79	193.31	89.18
K038 W16	Week 16	Non-anemic	Extensive	Mild	1456.91	4078.92	291.12	21.36	7.23	18404	155.58	55375.2	267.65	348.14	145.4	74.88	220.16	706.54	271.2	239.21	768.52	867.53	13832.2	3959.02	2119.37	4885.78	10271.4	6915.83	1107.91	251.19
T008 W16	Week 16	Anemic	Limited	Mod-sev	342.72	3383.15	1039.49	16.49	4.73	3112.36	13.81	14744.6	239.58	28.38	53.6	61.75	189.43	576.28	194.22	163.1	303.63	2287.06	67677	2206.06	873.92	3207.32	5806	2983.88	3258.34	150.45
T048 W16	Week 16	Non-anemic	NR	Mild	203.83	4063.2	260.18	14.17	26.15	736.4	13.81	32401.5	280.5	29.9	42.18	223.54	228.77	648.71	151.28	57.44	244.96	780.06	52087	2592.21	844.12	2988.68	4355.63	1764.62	481.24	115.34
T053 W16	Week 16	Anemic	Extensive	Mild	442.12	2249.74	44.51	18.13	1.18	7234.08	13.81	34994.5	252.42	113.61	57.19	7.37	229.59	560.06	209.31	187.89	430.44	526.97	4340.14	1949.12	1112.71	4351.12	3495.22	1453.84	993.92	162.27
T054 W16	Week 16	Non-anemic	Extensive	Mild	811.5	2665.59	104.58	17.69	7.28	9993.64	11.71	50125.7	235.66	56.53	37.45	14.25	221.21	463.24	188	112.33	569.99	716.1	24000.5	1828.78	734.14	4273.38	6023.97	2871.99	1097.1	126.18
T064 W16	Week 16	Non-anemic	Extensive	Mild	444.34	1589.45	174.65	14.5	1.18	9361.42	13.81	26063.8	207.74	34.47	25.29	24.04	213.98	526.17	169.14	142.89	442.75	559.75	6979.48	1827.27	1097.37	3147.18	4431.82	1644.88	776.22	128.78
T066 W16	Week 16	Anemic	Limited	Mod-sev	1656.68	5049.83	306.11	14.89	1.73	14528.5	9.95	25409.6	231.07	75.56	60.25	9.14	252.1	400.6	200.28	53.75	674.43	528.3	25481.5	2784.86	4081.36	4850.36	79274.9	19843.9	1141.66	190.38
T075 W16	Week 16	Non-anemic	Extensive	Mild	435.97	2526.39	506.1	11.81	1.62	1795.66	9.56	17130.5	331	23.75	40.78	5.02	104.42	396.47	123.45	3.5	217.01	519.82	41155.1	1909.03	209.72	3145.37	18280.1	9505.59	410.02	140.09
T115 W16	Week 16	Anemic	Limited	Mod-sev	82.3	879.45	35	11	6.57	482.37	6.27	9392.14	283.04	22.28	72.5	1.3	102.16	381.53	175.31	48.85	181.25	497.7	13958.2	2231.01	162.38	1886.66	3800.6	5635.69	534.25	159.05
B001 W16	Week 16	Non-anemic	Extensive	Mild	640.72	6472.53	289.53	18.37	15.59	6245.18	10.65	28068.6	371.27	71.65	67.31	83.1	205.7	645.75	364.38	150.59	439.23	935.02	50272.1	1997.59	1054.48	1946.53	4826.82	2723.73	1039.1	84.32
B088 W16	Week 16	Non-anemic	Extensive	Mild	345.86	2006.3	68.76	10.71	14.31	4310.25	64.61	25379	323.05	123.1	52.62	32.77	199.16	360.15	116.24	118.91	370.66	391.7	9784.32	1100.75	920.91	4313.24	79274.9	1419.76	394.32	163.03
B092 W16	Week 16	Non-anemic	Extensive	Mod-sev	33.56	1550.37	386.27	10.81	27.94	253.03	258.66	5241.05	150.7	98.54	49.4	73.98	104.55	322.67	195.83	3.23	239.49	879.73	29934	1415.91	34.92	1880.22	3718.43	3546.18	425.81	171.89
B093 W16	Week 16	Anemic	Extensive	Mild	87.67	1234.17	14.24	10.98	5.52	1599.56	93.71	13852.7	574.6	41.38	187.86	4.46	167.01	299.73	366.63	39.32	372.13	475.66	25255	1995.44	108	184.42	2677.67	5893.95	500.56	212.77
B102 W16	Week 16	Anemic	Limited	Mild	1501.1	2541.85	177.14	15.02	1.62	8478.69	11.71	43657.7	175.96	22.28	49.47	4.57	197.67	372.29	187.1	98.65	316.49	502.62	37978.7	3228.95	491	1194.03	3211.87	5781.81	1195.71	97.04
B104 W16	Week 16	Non-anemic	Limited	Mild	513.68	1723.61	86.18	18.78	3.48	13411.6	13.83	38226.2	244.95	95.71	32.15	10.14	229.43	532.08	179.86	64.38	750.31	624.58	5328.69	2758.19	1845.76	3978.03	15196.2	6453.29	832.23	101.87
B110 W16	Week 16	Anemic	Extensive	Mild	143.46	2217.95	147.53	10.92	1.62	344.26	9.56	16276.4	189.23	13.43	29.51	3.68	113.78	433.42	119.52	38.72	134.26	253.87	20180.6	1548.29	408.4	2625.76	6153.05	9559.04	255.84	165.68
B125 W16	Week 16	Anemic	Limited	Mod-sev	1688.51	3217.41	640.02	22.89	10.65	269523	8.23	46366.8	233.52	79.82	60.25	199.55	236.63	429.63	297.43	113.24	1010.58	1687.35	23113.5	2359.74	8039.84	217.15	79274.9	1622.15	2078.8	142.41
B129 W16	Week 16	Non-anemic	Extensive	Mild	358.81	2693.98	69.29	17.22	5.09	4189.24	13.83	40276.6	689.22	69.29	148.11	15.87	220.08	527.11	204.97	93.98	409.96	473.05	7994.36	2251.5	572.48	2566.62	6690.39	2917.91	579.45	180.68
B135 W16	Week 16	Anemic	Limited	Mod-sev	1839.4	4915.19	17.32	16.6	3.48	7150.54	11.71	39679	243.18	38.6	53.51	2.75	175.89	542.73	183.49	89.84	455.95	588.19	22039.1	1696.44	1155.48	2979.74	5678.81	7651.46	681.24	233.86
B139 W16	Week 16	Non-anemic	Extensive	Mod-sev	273.59	3792.47	20.76	10.04	1.73	4369.33	4.67	23208.3	200.34	45.5	39.85	11.92	175.06	365.58	193.79	77.77	287.51	305.58	10702.5	1461.5	406.7	3891.53	14117.5	2091.22	883.43	106.66
B145 W16	Week 16	Non-anemic	Extensive	Mod-sev	249.66	4100.94	262.36	10.17	4.71	4201.33	9.95	38248.5	273.71	27.84	25.58	13.97	161.58	358.34	84.66	0.85	261.09	356.76	11840.6	2077.81	303.03	1397.04	79274.9	27857.9	467.12	30.67
B192 W16	Week 16	Anemic	NR	Mild	93.79	1341.08	1.05	5.15	4.71	286.57	9.95	7904.78	113.67	12.73	12.06	1.66	5.15	271.08	78.13	0.85	120.26	122.96	2019.89	527.28	137.2	733.16	3899.61	3612.62	223.57	83.22
B204 W16	Week 16	Anemic	Limited	Mild	221.34	3205.03	294.01	11.79	24.31	3833.1	30.11	20825.9	220.02	52.48	27.01	37.09	266.74	368.56	216.27	29.5	479.8	378.72	14181.4	2425.53	546.51	3352.3	13612.1	4732.22	661.81	48.13
B205 W16	Week 16	Non-anemic	Limited	Mild	204.27	1045.43	14.57	7.12	1.73	2459.26	4.67	13630.8	147.44	11.45	20.27	4.07	88.62	293.92	125	32.02	248.67	220.67	16476.8	1444.57	1021.6	1676.88	79274.9	4618.47	361.1	39.31
B206 W16	Week 16	Non-anemic	Limited	Mild	10.62	205.7	0.5	7.5	1.18	15.91	0.98	9662.42	58.31	14.86	9.42	0.71	19.03	96.04	86.3	8.23	130.77	221.33	1318.47	73.35	6.9	1394.57	193.94	2653.44	226.01	79.05
K025 W16	Week 16	Anemic	Limited	Mod-sev	418.47	1638.23	447.26	14.76	9.55	12916.8	2.8	117430	376.33	25.17	27.55	81.29	232.23	401.81	147.34	144.83	415.01	668.27	28485.9	2108.94	2595.37	3735.09	79274.9	1783.77	374.4	83.22
K032 W16	Week 16	Non-anemic	Extensive	Mild	2085.97	5130.5	3788.44	28.34	27.24	27250.9	19.9	51356.8	328.68	97.68	75.31	250.76	310.2	716.94	315.82	158.14	1117.48	8401.42	34599.2	2757.78	3159.79	6180.36	8134.38	3628.89	3459.64	210.09
K034 W16	Week 16	Anemic	Limited	Mild	471.13	833.58	24.57	10.54	3.82	1930.37	13.81	10808.6	236.25	42.13	47.88	6.41	125.96	336.36	248.81	148.04	289.07	299.41	7601.15	1867.84	203.01	4411.27	1901	6005.13	572.66	294.74
K036 W16	Week 16	Non-anemic	Limited	Mild	349.91	2349.24	259.28	16.49	2.84	2744.77	7.38	18792	340.15	32.94	55.04	10.91	251.54	678.35	220.48	174.46	336.16	532.03	40094	4192.08	691.56	4525.33	7101.29	6328.49	631.26	225.9
K039 W16	Week 16	Anemic	Extensive	Mild	259.14	967.24	1.73	9.35	3.48	1582.86	5.15	12730.8	174.19	22.28	34.8	1.3	115.54	419.92	131.24	3.5	158.79	233.15	2899.77	1577.78	153.45	3706.51	2703.41	3653.94	265.23	162.37
K044 W16	Week 16	Anemic	Extensive	Mod-sev	231.62	1423.41	53.22	8.53	4.71	1930.68	4.67	17021.3	197.47	19.22	22.94	21.23	162.46	349.9	124.12	110.95	200.19	191.59	18962.8	1530.68	169.14	3224.04	79274.9	2122.99	289.29	108.75
T050 W16	Week 16	Anemic	Limited	Mild	566.13	2492.27	60.34	17.72	5.6	6745.56	13.81	35242.1	260.03	38.29	37.93	10.67	190.69	642.05	182.74	225.52	476.02	476.19	21310.6	3121.22	993.26	6186.38	8356.81	3810.91	823.71	135.08
T051 W16	Week 16	Anemic	Limited	Mod-sev	109.63	1379.97	36.41	10.71	1.73	2125.13	2.8	22816.1	119.45	19.22	28.2	28.59	151.84	272.88	122.38	19.8	262.86	237.1	14994.2	1192.1	22.46	6115.28	2134.51	2124.26	260.72	203.45
T061 W16	Week 16	Non-anemic	Limited	Mild	352.45	1401.77	27.48	17.96	3.82	13472.9	13.81	33669.1	286.7	42.13	45.02	2.01	234.49	650.19	208.38	193.32	595.35	647.17	3665.05	3567.94	1941.18	2499.58	5665.36	3979.52	1013.29	159.54
T076 W16	Week 16	Non-anemic	Extensive	Mild	185.59	859.08	34.96	12.75	1.18	2251.72	13.81	36802.7	197.3	23.09	20.42	8.79	228.77	610.25	124.59	135.04	250.51	304.72	6024.39	3727.68	301.69	3080.91	5776.45	3885.59	417.87	66.82
T099 W16	Week 16	Non-anemic	Limited	Mod-sev	409.39	587.98	1.73	11.33	1.62	1909.64	11.71	15224.1	196.3	26.72	45.45	1.8	98.51	467.5	117.55	82.62	345.74	317.89	501.27	1345.11	532.59	5689.75	8840.54	2155.63	383.68	260.43
T100 W16	Week 16	Non-anemic	Extensive	Mod-sev	199.16	1085.13	106.56	9.5	5.52	518.82	8.45	14900	208.04	46.49	38.86	12.46	150.9	331.99	110.25	76.5	260.24	301.83	13707.8	1880.37	392.92	3203.74	13612.1	7616.23	447.85	38.6
T106 W16	Week 16	Anemic	Limited	Mod-sev	129.83	1167.17	578.31	9.5	3.51	594.25	4.26	11601.2	160.91	37.98	41.86	44.66	114.7	326.98	116.48	38.59	225.53	344.88	38863.2	1748.34	104.1	4842.7	3092.42	2126.42	403.73	152.59
T109 W16	Week 16	Anemic	Extensive	Mod-sev	437.33	2701.72	448.36	20.17	0.65	14468.7	2113.2	58638	1585.34	1097.84	238.93	534.38	845.14	771.44	187.1	110.08	1226.26	2782.12	6956.11	3099.06	697.98	6147.55	14425.6	5267.38	3000.36	765.22
T116 W16	Week 16	Anemic	NR	Mod-sev	2161.14	2112.79	12.5	16.13	1.62	11755.5	13.83	27606.8	237.87	89.66	49.47	3.68	173.13	484.54	279.04	72.08	739.72	534.52	9646.14	2923.34	804.45	4542.83	7230.48	5132.93	907.82	265.6
COT 1	Control	Healthy	Healthy	Healthy	354.93	1201.93	0.52	8.34	3.51	1647.5	25.85	13795.7	212.65	1139.69	118.9	32.86	24.87	308.33	142.81	7.55	260.24	239.89	847.35	455.41	201.79	2221.86	2192.29	1551.73	419.19	122.28
COT 2	Control	Healthy	Healthy	Healthy	454.92	5724.4	246.08	11.7	9.03	1359.66	12.36	24533.5	206.2	45.63	37.37	7.03	259.26	392.94	192.08	97.88	437.15	467.53	15639.6	2402.39	519.86	2996.92	13612.1	4845.95	653.13	59.43
COT 3	Control	Healthy	Healthy	Healthy	194.96	4734.27	174.56	12.46	5.09	885.35	11.71	26183.4	192.77	56.53	50.82	5.02	126.79	464.66	179.86	3.5	157.05	403.52	7770.93	1308.32	221.66	3212.17	4089.8	2967.4	385.57	139.27
COT 4	Control	Healthy	Healthy	Healthy	210.99	980.13	6.06	13.75	5.09	2996.55	28.23	22946	221.95	22.28	82.1	3.68	158.34	554.08	241.63	125.02	313.23	335.64	4129.99	1498.12	489.93	4315.47	6813.82	2973.53	647.3	211.78
COT 5	Control	Healthy	Healthy	Healthy	299.24	2248.74	51.94	13.91	5.09	4093.71	13.83	25714.1	214.43	41.58	41.45	6.76	150.61	440.52	226.92	88.05	263.86	345.76	3791.48	1560.42	834.98	2559.24	4615.4	2879.98	511.65	224.5
COT 6	Control	Healthy	Healthy	Healthy	797.99	2665.59	24.23	23.67	7.97	16046	24.18	52524.1	311.44	144.47	45.45	4.13	233.9	596.65	239.05	142.66	1192.83	713.71	793.65	2178.16	3181.83	4171.07	5650.78	2831.81	1267.85	122.11
COT 7	Control	Healthy	Healthy	Healthy	242.23	1281.59	1.05	10.31	4.03	3710.7	4.67	34788.3	206.48	35.93	41.13	2.5	175.49	335.45	159.14	66.89	391.18	265.54	739.51	1299.77	735.66	2858.04	15458.8	1551.08	533.03	139.58
COT 8	Control	Healthy	Healthy	Healthy	703.52	9503.21	669.4	13.99	12.77	7258.33	18.2	42959.3	235.98	108.54	74.21	68.23	208.26	426	183.18	70.36	554.18	765.71	21510	1446.27	928.53	3640.15	79274.9	5159.53	742.87	237.23
COT 9	Control	Healthy	Healthy	Healthy	1235.59	1741.06	14.98	14.19	1.73	15085.9	9.09	32837.4	215.91	67.08	50.71	4.45	227.81	418.74	169.15	112.1	595.55	414.8	8748.91	1842.45	2168.12	3676.37	79274.9	27857.9	942.24	276.01
COT 11	Control	Healthy	Healthy	Healthy	959.29	2744.21	117.43	17.8	2.84	7813.66	19.9	51690.6	217.24	80.29	160.68	7.84	220.57	588.83	327	119.71	915.72	422.34	1673.5	2560.15	340.31	4717.84	4748.69	2475.73	948.72	394.29
COT 12	Control	Healthy	Healthy	Healthy	12.89	436.29	9.97	7.5	1.18	31.72	7.38	1121.5	59.27	23.84	42.18	0.45	17.76	114.84	292.35	44.74	134.7	180	563.74	57.7	7.57	3009.6	250.24	4095.69	257.12	93.13
COT 13	Control	Healthy	Healthy	Healthy	387.83	2442.52	1.01	11.48	1.18	2173.23	13.81	20605	210.59	17.84	25.29	2.01	126.41	493.07	182.74	62.23	361.27	320.61	1079.88	1353.9	559.55	1469.52	3194.76	7206.94	702.73	71.18
COT 14	Control	Healthy	Healthy	Healthy	585.16	2175.11	23.74	13.75	1.75	3958.92	22.87	30493.2	465.09	42.13	44.31	4.48	437.12	468.1	251.52	78.02	432.2	424.92	780.51	3404.46	982.18	1350.88	4354.33	5337.42	959.48	164.09
COT 15	Control	Healthy	Healthy	Healthy	624.26	1720.54	299.08	15.91	3.82	3120.98	28.67	38096.8	242.91	56.82	56.47	30.39	264.43	546.05	282.69	155.63	403.96	465.98	12338.6	4102.75	1099.31	5111.22	6316.45	6870.74	724.36	303.33
COT 16	Control	Healthy	Healthy	Healthy	894.49	1420.56	5.75	12.5	0.37	2698.8	13.81	14167.9	241.01	40.59	50.74	3.01	57.89	521.75	362.7	132.38	396.87	336.43	3330.61	935.2	714.46	3643.75	5333.91	4469.96	424.44	185.16
COT 17	Control	Healthy	Healthy	Healthy	116.29	4242.67	634.18	14	23.92	554.97	19.9	21325.2	243.86	30.66	35.81	95.54	195.71	530.59	199.91	88.59	207.62	667	36203.3	2196.28	451.1	998.44	5759.2	2569.26	518.29	110.88
COT 18	Control	Healthy	Healthy	Healthy	429.12	1357.88	5.33	14.59	1.18	5465.88	16.89	19405.8	198.72	63.82	63.69	5.45	200.71	555.63	314.95	189.45	292.71	419.77	1435.9	2692.91	476.94	4047.25	3782.28	3335.25	681.09	337.89
COT 19	Control	Healthy	Healthy	Healthy	349.09	3133.76	178.65	16.56	3.33	2715.31	13.74	10657	254.87	12.99	42.56	12.37	229.75	1654.57	301.59	85.59	410.29	875.78	11373.8	2679.35	689.4	3134.44	14757.8	4299.38	638.84	178.27
COT 20	Control	Healthy	Healthy	Healthy	203.35	3275.41	209.87	17.2	1.18	1659.79	17.34	58824.6	364.7	42.15	72.08	15.35	253.13	769.65	240.2	115.09	427.06	451.13	9783.19	4339.97	166.65	3028.5	20772.5	6060.94	517.53	186.94
